# Supplementary material for: Presence of Anaplasma phagocytophilum Ecotype I in UK Ruminants and Associated Zoonotic Risk
Source: MDPI journal article supplement (doi:10.3390/pathogens12020216), 2023-01-30
Supplement: s1 [file s1]

**Supplementary Table S1.** Nucleotide polymorphisms detected in the sequence of the *groEL* gene 571 bp fragment and predicted amino-acid changes in the samples analysed in this study. Nucleotide position refers to the position in the amplified fragment once primers were removed; reference base represent the base identified as the most common in the overall alignment and called base represent the nucleotide substitution observed in the same position; number of sequences indicates the number of the sequences with the reference base; SNP indicates number of sequences showing base change at that specific position; Underlined are the base changes in each codon.

| Nucleotide position | Ref base | Called base | Possible codons modified |             | Coded amino-acid | Type of mutation | Number of sequences showing SNPs |
|---------------------|----------|-------------|--------------------------|-------------|------------------|------------------|----------------------------------|
| 1 (588)             | C        | Y           | CG <u>C</u>              | CG <u>T</u> | Arg              | Synonymous       | 1/72                             |
| 10 (597)            | T        | A           | CT <u>T</u>              | CT <u>A</u> | Leu              | Synonymous       | 1/72                             |
| 73 (660)            | C        | T           | TTC                      | TT <u>T</u> | Phe              | Synonymous       | 1/72                             |
| 145 (732)           | A        | G           | AG <u>A</u>              | AG <u>G</u> | Arg              | Synonymous       | 36/72                            |
| 187 (774)           | G        | T           | CT <u>G</u>              | CT <u>T</u> | Leu              | Synonymous       | 30/72                            |
| 193 (780)           | G        | A           | AC <u>A</u>              | AC <u>G</u> | Thr              | Synonymous       | 6/72                             |
| 253 (840)           | T        | C           | TT <u>T</u>              | TT <u>C</u> | Phe              | Synonymous       | 20/72                            |
| 262 (849)           | G        | R           | AG <u>G</u>              | AG <u>A</u> | Arg              | Synonymous       | 1/72                             |
| 346 (933)           | T        | C           | GG <u>T</u>              | GG <u>C</u> | Gly              | Synonymous       | 33/72                            |
| 415 (1002)          | T        | C           | GG <u>T</u>              | GG <u>C</u> | Gly              | Synonymous       | 22/72                            |
| 526 (1113)          | G        | A           | GCC                      | GCA         | Ade              | Synonymous       | 23/72                            |
| 535 (1122)          | C        | T           | TCC                      | TC <u>T</u> | Ser              | Synonymous       | 10/72                            |
| 541 (1128)          | C        | T           | GGC                      | GG <u>T</u> | Gly              | Synonymous       | 22/72                            |
