# Supplementary material for: Presence of Anaplasma phagocytophilum Ecotype I in UK Ruminants and Associated Zoonotic Risk
Source: MDPI journal article supplement (doi:10.3390/pathogens12020216), 2023-01-30
Supplement: s1 [file s1]

Alignment: C:\BioEdit\Temp\~out.tmp

```

      ....|....| ....|....| ....|....| ....|....| ....|....|
      10      20      30      40      50
22_19 1pcr  CGGATATCTT TCGCCTTACT TTGTTACAAA TGCTGAAAAA ATGCTGGTGG
22_19 2pcr  CGGATATCTT TCGCCTTACT TTGTTACAAA TGCTGAAAAA ATGCTGGTGG
22_45 1pcr  CCGGATATCTT TCGCCTTACT TTGTTACAAA TGCTGAAAAA ATGCTGGTGG
22_45 2pcr  TGGGATATCTT TCGCCTTACT TTGTTACAAA TGCTGAAAAA ATGCTGGTGG
22_54 1pcr  -----
22_54 2pcr  CGGATATCTT TCGCCTTACT TTGTTACAAA TGCTGAAAAA ATGCTGGTGG
```

```

      ....|....| ....|....| ....|....| ....|....| ....|....|
      60      70      80      90     100
22_19 1pcr  AATTTGAAAA TCCATACATA TTCCTTACTG AAAAGAAGAT TAATCTTGTA
22_19 2pcr  AATTTGAAAA TCCATACATA TTCCTTACTG AAAAGAAGAT TAATCTTGTA
22_45 1pcr  AATTTGAAAA TCCATACATA TTCCTTACTG AAAAGAAGAT TAATCTTGTA
22_45 2pcr  AATTTGAAAA TCCATACATA TTCCTTACTG AAAAGAAGAT TAATCTTGTA
22_54 1pcr  AATTTGAAAA TCCATACATA TTCCTTACTG AAAAGAAGAT TAATCTTGTA
22_54 2pcr  AATTTGAAAA TCCATACATA TTCCTTACTG AAAAGAAGAT TAATCTTGTA
```

```

      ....|....| ....|....| ....|....| ....|....| ....|....|
      110     120     130     140     150
22_19 1pcr  CAAAGCATTC TACCAATCTT AGAAAACGTT GCACGGTCTG GAAGACCATT
22_19 2pcr  CAAAGCATTC TACCAATCTT AGAAAACGTT GCACGGTCTG GAAGACCATT
22_45 1pcr  CAAAGCATTC TACCAATCTT AGAAAACGTT GCACGGTCTG GAAGRCCATT
22_45 2pcr  CAAAGCATTC TACCAATCTT AGAAAACGTT GCACGGTCTG GAAGACCATT
22_54 1pcr  CAAAGCATTC TACCAATCTT AGAAAACGTT GCACGGTCTG GAAGACCATT
22_54 2pcr  CAAAGCATTC TACCAATCTT AGAAAACGTT GCACGGTCTG GAAGACCATT
```

```

      ....|....| ....|....| ....|....| ....|....| ....|....|
      160     170     180     190     200
22_19 1pcr  GCTCATCATA GCTGAAGACG TTGAAGGTGA AGCTCTKAGC ACGCTTGTAC
22_19 2pcr  GCTCATCATA GCTGAAGACG TTGAAGGTGA AGCTCTTAGC ACGCTTGTAC
22_45 1pcr  GCTCATCATA GCTGAAGACG TTGAAGGTGA AGCTCTGAGC ACGCTTGTAC
22_45 2pcr  GCTCATCATA GCTGAAGACG TTGAAGGTGA AGCTCTGAGC ACGCTTGTAC
22_54 1pcr  GCTCATCATA GCTGAAGACG TTGAAGGTGA AGCTCTTAGC ACGCTTGTAC
22_54 2pcr  GCTCATCATA GCTGAAGACG TTGAAGGTGA AGCTCTGAGC ACGCTTGTAC
```

```

      ....|....| ....|....| ....|....| ....|....| ....|....|
      210     220     230     240     250
22_19 1pcr  TCAATAAGCT CCGTGGTGGC CTTCAAGTTG CTGCTGTAAA GGCGCCTGGT
22_19 2pcr  TCAATAAGCT CCGTGGTGGC CTTCAAGTTG CTGCTGTAAA GGCGCCTGGT
22_45 1pcr  TCAATAAGCT CCGTGGTGGC CTTCAAGTTG CTGCTGTAAA GGCGCCTGGT
22_45 2pcr  TCAATAAGCT CCGTGGTGGC CTTCAAGTTG CTGCTGTAAA GGCGCCTGGT
22_54 1pcr  TCAATAAGCT CCGTGGTGGC CTTCAAGTTG CTGCTGTAAA GGCGCCTGGT
22_54 2pcr  TCAATAAGCT CCGTGGTGGC CTTCAAGTTG CTGCTGTAAA GGCGCCTGGT
```

|            |                     |                    |                    |                    |                    |
|------------|---------------------|--------------------|--------------------|--------------------|--------------------|
|            | ..... .....  .....  | ..... .....  ..... | ..... .....  ..... | ..... .....  ..... | ..... .....  ..... |
|            | 260                 | 270                | 280                | 290                | 300                |
| 22_19 1pcr | TT <b>Y</b> GGTGACA | GGAGAAAAGA         | CATGCTTGGC         | GATATTGCTG         | TAATAGTAGG         |
| 22_19 2pcr | TT <b>C</b> GGTGACA | GGAGAAAAGA         | CATGCTTGGC         | GATATTGCTG         | TAATAGTAGG         |
| 22_45 1pcr | TTTGGTGACA          | GGAGAAAAGA         | CATGCTTGGC         | GATATTGCTG         | TAATAGTAGG         |
| 22_45 2pcr | TTTGGTGACA          | GGAGAAAAGA         | CATGCTTGGC         | GATATTGCTG         | TAATAGTAGG         |
| 22_54 1pcr | TTTGGTGACA          | <b>A</b> AGAAAAGA  | CATGCTTGGC         | GATATTGCTG         | TAATAGTAGG         |
| 22_54 2pcr | TTTGGTGACA          | <b>G</b> AGAAAAGA  | CATGCTTGGC         | GATATTGCTG         | TAATAGTAGG         |

|            |                    |                    |                    |                    |                    |
|------------|--------------------|--------------------|--------------------|--------------------|--------------------|
|            | ..... .....  ..... | ..... .....  ..... | ..... .....  ..... | ..... .....  ..... | ..... .....  ..... |
|            | 310                | 320                | 330                | 340                | 350                |
| 22_19 1pcr | CGCTAAGTAT         | GTAGTAAATG         | ACGAGCTTGC         | TGTTAAGATG         | GAAGATATCG         |
| 22_19 2pcr | CGCTAAGTAT         | GTAGTAAATG         | ACGAGCTTGC         | TGTTAAGATG         | GAAGATATCG         |
| 22_45 1pcr | CGCTAAGTAT         | GTAGTAAATG         | ACGAGCTTGC         | TGTTAAGATG         | GAAGACATCG         |
| 22_45 2pcr | CGCTAAGTAT         | GTAGTAAATG         | ACGAGCTTGC         | TGTTAAGATG         | GAAGACATCG         |
| 22_54 1pcr | CGCTAAGTAT         | GTAGTAAATG         | ACGAGCTTGC         | TGTTAAGATG         | GAAGATATCG         |
| 22_54 2pcr | CGCTAAGTAT         | GTAGTAAATG         | ACGAGCTTGC         | TGTTAAGATG         | GAAGATATCG         |

|            |                    |                    |                    |                    |                    |
|------------|--------------------|--------------------|--------------------|--------------------|--------------------|
|            | ..... .....  ..... | ..... .....  ..... | ..... .....  ..... | ..... .....  ..... | ..... .....  ..... |
|            | 360                | 370                | 380                | 390                | 400                |
| 22_19 1pcr | CTCTAAGCGA         | TCTTGGTACT         | GCTAAGAGCG         | TACGCATCAC         | AAAAGACGCA         |
| 22_19 2pcr | CTCTAAGCGA         | TCTTGGTACT         | GCTAAGAGCG         | TACGCATCAC         | AAAAGACGCA         |
| 22_45 1pcr | CTCTAAGCGA         | TCTTGGTACT         | GCTAAGAGCG         | TACGCATCAC         | AAAAGACGCA         |
| 22_45 2pcr | CTCTAAGCGA         | TCTTGGTACT         | GCTAAGAGCG         | TACGCATCAC         | AAAAGACGCA         |
| 22_54 1pcr | CTCTAAGCGA         | TCTTGGTACT         | GCTAAGAGCG         | TACGCATCAC         | AAAAGACGCA         |
| 22_54 2pcr | CTCTAAGCGA         | TCTTGGTACT         | GCTAAGAGCG         | TACGCATCAC         | AAAAGACGCA         |

|            |                    |                     |                    |                    |                    |
|------------|--------------------|---------------------|--------------------|--------------------|--------------------|
|            | ..... .....  ..... | ..... .....  .....  | ..... .....  ..... | ..... .....  ..... | ..... .....  ..... |
|            | 410                | 420                 | 430                | 440                | 450                |
| 22_19 1pcr | ACTACTATCA         | TAGGTAGTGT          | TGATAGCAGT         | TCTGAAAGCA         | TAGCTAGCAG         |
| 22_19 2pcr | ACTACTATCA         | TAGGTAGTGT          | TGATAGCAGT         | TCTGAAAGCA         | TAGCTAGCAG         |
| 22_45 1pcr | ACTACTATCA         | TAGG <b>T</b> AGTGT | TGATAGCAGT         | TCTGAAAGCA         | TAGCTAGCAG         |
| 22_45 2pcr | ACTACTATCA         | TAGG <b>C</b> AGTGT | TGATAGCAGT         | TCTGAAAGCA         | TAGCTAGCAG         |
| 22_54 1pcr | ACTACTATCA         | TAGGTAGTGT          | TGATAGCAGT         | TCTGAAAGCA         | TAGCTAGCAG         |
| 22_54 2pcr | ACTACTATCA         | TAGGTAGTGT          | TGATAGCAGT         | TCTGAAAGCA         | TAGCTAGCAG         |

|            |                    |                    |                    |                    |                    |
|------------|--------------------|--------------------|--------------------|--------------------|--------------------|
|            | ..... .....  ..... | ..... .....  ..... | ..... .....  ..... | ..... .....  ..... | ..... .....  ..... |
|            | 460                | 470                | 480                | 490                | 500                |
| 22_19 1pcr | GACTAATCAA         | ATCAAAGCTC         | AGATAGAAAA         | TTCTAGTTCT         | GATTATGACA         |
| 22_19 2pcr | GACTAATCAA         | ATCAAAGCTC         | AGATAGAAAA         | TTCTAGTTCT         | GATTATGACA         |
| 22_45 1pcr | GACTAATCAA         | ATCAAAGCTC         | AGATAGAAAA         | TTCTAGTTCT         | GATTATGACA         |
| 22_45 2pcr | GACTAATCAA         | ATCAAAGCTC         | AGATAGAAAA         | TTCTAGTTCT         | GATTATGACA         |
| 22_54 1pcr | GACTAATCAA         | ATCAAAGCTC         | AGATAGAAAA         | TTCTAGTTCT         | GATTATGACA         |
| 22_54 2pcr | GACTAATCAA         | ATCAAAGCTC         | AGATAGAAAA         | TTCTAGTTCT         | GATTATGACA         |

|            |                    |                    |                    |                    |                    |
|------------|--------------------|--------------------|--------------------|--------------------|--------------------|
|            | ..... .....  ..... | ..... .....  ..... | ..... .....  ..... | ..... .....  ..... | ..... .....  ..... |
|            | 510                | 520                | 530                | 540                | 550                |
| 22_19 1pcr | AGGAAAAGCT         | TAGAGAACGT         | TTAGCAAAGC         | TTTCCGGTGG         | TGTTGCTGTA         |
| 22_19 2pcr | AGGAAAAGCT         | TAGAGAACGT         | TTAGCAAAGC         | TTTCCGGTGG         | TGTTGCTGTA         |
| 22_45 1pcr | AGGAAAAGCT         | TAGAGAACGT         | TTAGCGAAGC         | TTTCCGGTGG         | TGTTGCTGTA         |
| 22_45 2pcr | AGGAAAAGCT         | TAGAGAACGT         | TTAGCAAAGC         | TTTCCGGTGG         | TGTTGCTGTA         |
| 22_54 1pcr | AGGAAAAGCT         | TAGAGAACGT         | TTAGCGAAGC         | TTTCCGGTGG         | CGTTGCTGTA         |
| 22_54 2pcr | AGGAAAAGCT         | TAGAGAACGT         | TTAGCAAAGC         | TTTCCGGTGG         | CGTTGCTGTA         |

|            |                    |                    |   |
|------------|--------------------|--------------------|---|
|            | ..... .....  ..... | ..... .....  ..... |   |
|            | 560                | 570                |   |
| 22_19 1pcr | CTCAAGGTTG         | GTGGATCCAG         | C |
| 22_19 2pcr | CTCAAGGTTG         | GTGGATCCAG         | C |
| 22_45 1pcr | CTCAAGGTTG         | GTGGATCCAG         | C |
| 22_45 2pcr | CTCAAGGTTG         | GTGGATCCAG         | C |
| 22_54 1pcr | CTCAAGGTTG         | GTGGATCCAG         | C |
| 22_54 2pcr | CTCAAGGTTG         | GTGGATCCAG         | C |
