# Supplementary material for: Presence of Anaplasma phagocytophilum Ecotype I in UK Ruminants and Associated Zoonotic Risk
Source: Pathogens. 2023 Jan 30;12(2):216. doi: 10.3390/pathogens12020216 (PMC9966478; doi:10.3390/pathogens12020216)
Supplement: Supplementary file 1 [file pathogens-12-00216-s001.zip]

Archive with 4 entries (4 files):
- supplementary figure S1.pdf
- supplementary figure S2 large tree.jpg
- supplementary table S1.pdf
- supplementary table S2 - sequences used for the aligment -use this.xlsx
