# Supplementary material for: Presence of Anaplasma phagocytophilum Ecotype I in UK Ruminants and Associated Zoonotic Risk
Source: Pathogens. 2023 Jan 30;12(2):216. doi: 10.3390/pathogens12020216 (PMC9966478; doi:10.3390/pathogens12020216)
Supplement: Supplementary file 1 [file pathogens-12-00216-s001.zip › supplementary table S2 - sequences used for the aligment -use this.xlsx]

## Sheet: combined no duplicates
Key	host	Country	Ecotype
00000TEMP	horse	Netherlands	1	TGAAAATCCATACATATTTCTTACTGAAAAGAAGATTAATCTTGTACAAAGCATTCTACCAATCTTAGAAAACGTTGCACGGTCTGGAAGACCATTGCTCATCATAGCTGAAGACGTTGAAGGTGAAGCTCTGAGCACGCTTGTACTCAATAAGCTCCGTGGTGGCCTTCAAGTTGCTGCTGTAAAGGCGCCTGGTTTCGGTGACAGGAGAAAAGACATGCTTGGCGATATTGCTGTAATAGTAGGCGCTAAGTATGTAGTAAATGACGAGCTTGCTGTTAAGATGGAAGACATCGCTCTAAGCGATCTTGGTACTGCTAAGAGCGTACGCATCACAAAAGACGCAACTACTATCATAGGTAGTGTTGATAGCAGTTCTGAAAGCATAGCTAGCAGGAC…
107Sheep11763	Ovis aries	Netherlands	1	GGATATCTTTCGCCTTACTTTGTTACAAATGCTGAAAAAATGCTGGTGGAATTTGAAAATCCATACATATTCCTTACTGAAAAGAAGATTAATCTTGTACAAAGCATTCTACCAATCTTAGAAAACGTTGCACGGTCTGGAAGGCCATTGCTCATCATAGCTGAAGACGTTGAAGGTGAAGCTCTTAGCACGCTTGTACTCAATAAGCTCCGTGGTGGCCTTCAAGTTGCTGCTGTAAAGGCGCCTGGTTTTGGTGACAGGAGAAAAGACATGCTTGGCGATATTGCTGTAATAGTAGGCGCTAAGTATGTAGTAAATGACGAGCTTGCTGTTAAGATGGAAGATATCGCTCTAAGCGATCTTGGTACTGCTAAGAGCGTACGCATCACAAAAGACGCA…
111Sheep11909	Ovis aries	Netherlands	1	GGATATCTATCGCCTTACTTTGTTACAAATGCTGAAAAAATGCTGGTGGAATTTGAAAATCCATACATATTCCTTACTGAAAAGAAGATTAATCTTGTACAAAGCATTCTACCAATCTTAGAAAACGTTGCACGGTCTGGAAGACCATTGCTCATCATAGCTGAAGACGTTGAAGGTGAAGCTCTGAGCACACTTGTACTCAATAAGCTCCGTGGTGGCCTTCAAGTTGCTGCTGTAAAGGCGCCTGGTTTTGGTGACAGGAGAAAAGACATGCTTGGCGATATTGCTGTAATAGTAGGCGCTAAGTATGTAGTAAATGACGAGCTTGCTGTTAAGATGGAAGATATCGCTCTAAGCGATCTTGGTACTGCTAAGAGCGTACGCATCACAAAAGACGCA…
135Sheep30182	Ovis aries	Netherlands	1	GGATATCTTTCGCCTTACTTTGTTACAAATGCTGAAAAAATGCTGGTGGAATTTGAAAATCCATACATATTCCTTACTGAAAAGAAGATTAATCTTGTACAAAGCATTCTACCAATCTTAGAAAACGTTGCACGGTCTGGAAGACCATTGCTCATCATAGCTGAAGACGTTGAAGGTGAAGCTCTGAGCACGCTTGTACTCAATAAGCTCCGTGGTGGCCTTCAAGTTGCTGCTGTAAAGGCGCCTGGTTTCGGTGACAGGAGAAAAGACATGCTTGGCGATATTGCTGTAATAGTAGGCGCTAAGTATGTAGTAAATGACGAGCTTGCTGTTAAGATGGAAGACATCGCTCTAAGCGATCTTGGTACTGCTAAGAGCGTACGCATCACAAAAGACGCA…
142Sheep32211	Ovis aries	Netherlands	1	GGATATCTTTCGCCTTACTTTGTTACAAATGCTGAAAAAATGCTGGTGGAATTTGAAAATCCATACATATTCCTTACTGAAAAGAAGATTAATCTTGTACAAAGCATTCTACCAATCTTAGAAAACGTTGCACGGTCTGGAAGGCCATTGCTCATCATAGCTGAAGACGTTGAAGGTGAAGCTCTGAGCACGCTTGTACTCAATAAGCTCCGTGGTGGCCTTCAAGTTGCTGCTGTAAAGGCGCCTGGTTTCGGTGACAGGAGAAAAGACATGCTTGGCGATATTGCTGTAATAGTAGGCGCTAAGTATGTAGTAAATGACGAGCTTGCTGTTAAGATGGAAGATATCGCTCTAAGCGATCTTGGTACTGCTAAGAGCGTACGCATCACAAAAGACGCA…
16 TM4	Turdus merula	Czech Republic	4	ATATTCCTTACTGAAAAGAAGATTAATCTTGTACAGAGCATTTTACCAATATTAGAAAACGTTGCGAGAGCTGGTAGGCCATTGCTCATTATAGCTGAAGATGTTGAAGGTGAGGCTCTGAGCACACTTGTTCTAAATAAGCTACGTGGTGGGCTTCAAGTTGCTGCTGTGAAGGCGCCTGGTTTCGGTGATAGAAGGAAAGACATGCTAGGCGATATTGCTGTAATAGTAGGCGCTAAGTATGTAGTAAATGATGAGCTTGCTGTTAAGATGGAAGATATCGCTCTAAGCGATTTGGGTACTGCCAAGAGCGTGCGCATCACTAAAGACGCAACAACTATCATAGGTAGTGTTGATAGCAGTTCT
37Sheep11918	Ovis aries	Netherlands	1	GGATATCTTTCGCCTTACTTTGTTACAAATGCTGAAAAAATGCTGGTGGAATTTGAAAATCCATACATATTCCTTACTGAAAAGAAGATTAATCTTGTACAAAGCATTCTACCAATCTTAGAAAACGTTGCACGGTCTGGAAGACCATTGCTCATCATAGCTGAAGACGTTGAAGGTGAAGCTCTGAGCACGCTTGTACTCAATAAGCTCCGTGGTGGCCTTCAAGTTGCTGCTGTAAAGGCGCCTGGTTTTGGTGACAGGAGAAAAGACATGCTTGGCGATATTGCTGTAATAGTAGGCGCTAAGTATGTAGTAAATGACGAGCTTGCTGTTAAGATGGAAGATATCGCTCTAAGCGATCTTGGTACTGCTAAGAGCGTACGCATCACAAAAGACGCA…
39Sheep11920	Ovis aries	Netherlands	1	GGATATCTTTCGCCTTACTTTGTTACAAATGCTGAAAAAATGCTGGTGGAATTTGAAAATCCATACATATTCCTTACTGAAAAGAAGATTAATCTTGTACAAAGCATTCTACCAATCTTAGAAAACGTTGCACGGTCTGGAAGACCATTGCTCATCATAGCTGAAGACGTTGAAGGTGAAGCTCTGAGCACGCTTGTACTCAATAAGCTCCGTGGTGGCCTTCAAGTTGCTGCTGTAAAGGCGCCTGGTTTCGGTGACAGGAGAAAAGACATGCTTGGCGATATTGCTGTAATAGTAGGCGCTAAGTATGTAGTAAATGACGAGCTTGCTGTTAAGATGGAAGATATCGCTCTAAGCGATCTTGGTACTGCTAAGAGCGTACGCATCACAAAAGACGCA…
43Sheep11934	Ovis aries	Netherlands	1	GGATATCTTTCGCCTTACTTTGTTACAAATGCTGAAAAAATGCTGGTGGAATTTGAAAATCCATACATATTCCTTACTGAAAAGAAGATTAATCTTGTACAAAGCATTCTACCAATCTTAGAAAACGTTGCACGGTCTGGAAGACCATTGCTCATCATAGCTGAAGACGTTGAAGGTGAAGCTCTTAGCACGCTTGTACTCAATAAGCTCCGTGGTGGCCTTCAAGTTGCTGCTGTAAAGGCGCCTGGTTTCGGTGACAGGAGAAAAGACATGCTTGGCGATATTGCTGTAATAGTAGGCGCTAAGTATGTAGTAAATGACGAGCTTGCTGTTAAGATGGAAGACATCGCTCTAAGCGATCTTGGTACTGCTAAGAGCGTACGCATCACAAAAGACGCA…
47Sheep59727	Ovis aries	Netherlands	1	GGATATCTTTCGCCTTACTTTGTTACAAATGCTGAAAAAATGCTGGTGGAATTTGAAAATCCATACATATTCCTTACTGAAAAGAAGATTAATCTTGTACAAAGCATTCTACCAATCTTAGAAAACGTTGCACGGTCTGGAAGACCATTGCTCATCATAGCTGAAGACGTTGAAGGTGAAGCTCTGAGCACGCTTGTACTCAATAAGCTCCGTGGTGGCCTTCAAGTTGCTGCTGTAAAGGCGCCTGGTTTCGGTGACAGGAGAAAAGACATGCTTGGCGATATTGCTGTAATAGTAGGCGCTAAGTATGTAGTAAATGACGAGCTTGCTGTTAAGATGGAAGACATCGCTCTAAGCGATCTTGGTACTGCTAAGAGCGTACGCATCACAAAAGACGCA…
50 EE	Erinaceus europaeus	Czech Republic	1	GGATATCTTTCGCCTTACTTTGTTACAAATGCTGAAAAAATGCTGGTGGAATTTGAAAATCCATACATATTCCTTACTGAAAAGAAGATTAATCTTGTACAAAGCATTCTACCAATCTTAGAAAACGTTGCACGGTCTGGAAGACCATTGCTCATCATAGCTGAAGACGTTGAAGGTGAAGCTCTGAGCACGCTTGTACTCAATAAGCTCCGTGGTGGCCTTCAAGTTGCTGCTGTAAAGGCGCCTGGTTTCGGTGACAGGAGAAAAGACATGCTTGGCGATATTGCTGTAATAGTAGGCGCTAAGTGTGTAGTAAATGACGAGCTTGCTGTTAAGATGGAAGACATCGCTCTAAGCGATCTTGGTACTGCTAAGAGCGTACGCATCACAAAAGACGCA…
6 TM	Turdus merula	Czech Republic	4	GGATATCTTTCGCCTTACTTTGTTACGAATGCTGAAAAGATGCTGGTGGAATTTGAAAATCCATACATATTCCTTACTGAAAAGAAGATTAATCTTGTACAGAGCATTTTACCAATATTAGAAAACGTTGCGAGAGCTGGTAGGCCATTGCTCATTATAGCTGAAGATGTTGAAGGTGAGGCTCTGAGCACACTTGTTCTAAATAAGCTACGTGGTGGGCTTCAAGTTGCTGCTGTGAAGGCGCCTGGTTTCGGTGATAGAAGGAAAGACATGCTAGGCGATATTGCTGTAATAGTAGGCGCTAAGTATGTAGTAAATGATGAGCTTGCTGTTAAGATGGAAGATATCGCTCTAAGCGATTTGGGTACTGCCAAGAGCGTGCGCATCACTAAAGACGCA…
AB454079	Deer	Japan	2	AGGAAGCGTAGCCTGAAACTCTTGTTTTTTGTTCCGCTAGTTTGAAGTTAGGGTGTTCTGTTAGTTTGAAAAAGTTTAGGAGGTTTGGAAATGTCAAATACGGTAGTTTCGGGTGAGGTGTTAGATAAGTCTATCCGGGAAGTTATACGAATCCTGGAAGACGCAGTAGGTTGTACTGCAGGTCCTAAGGGACTCACTGTGGCCATTAGCAAGCCTTATGGATCTCCAGAAATCACAAAAGATGGCTACAAGGTGATGAAGAGTATAAAGCCTGAGGAACCATTGGCTGCTGCAATCGCAAGCATAATTACTCAGAGTGCGTCCCAGTGCAATGACAAGGTAGGTGATGGGACGACTACTTGCTCAATACTTACAGCAAAAGTTATTGAAGAAGTATCT…
AF033101	Homo sapiens	Slovenia	1	TTATGCTACGGTTGTTTGTTCTATTGGTCTAAAGTTTAGGAGGTTCAAAAATGTCAAATACGGTAGTCACGGGTGAGGTATTAGATAAGTCTATTAGGGAAGTAGTACGCATCCTAGAAGATGCAGTTGGTTGTACTGCTGGTCCTAAAGGCCTCACTGTAGCGATTAGTAAGCCTTATGGGTCGCCAGAGATCACAAAGGATGGCTACAAGGTAATGAAGAGTATAAAGCCTGAAGAACCACTGGCTGCCGCTATAGCGAGCATCATTACTCAGAGTGCTTCTCAGTGTAATGATAAGGTGGGAGATGGAACTACTACATGCTCCATACTAACAGCAAAAGTGATTGAAGAAGTCTCAAAAGCGAAAGCTGCTGGATCTGATATTGTTAGCATAAAGA…
AF033101variant	Homo sapiens	Austria	1	TTATGCTACGGTTGTTTGTTCTATTGGTCTAAAGTTTAGGAGGTTCAAAAATGTCAAATACGGTAGTCACGGGTGAGGTATTAGATAAGTCTATTAGGGAAGTAGTACGCATCCTAGAAGATGCAGTTGGTTGTACTGCTGGTCCTAAAGGCCTCACTGTAGCGATTAGTAAGCCTTATGGGTCGCCAGAGATCACAAAGGATGGCTACAAGGTAATGAAGAGTATAAAGCCTGAAGAACCACTGGCTGCCGCTATAGCGAGCATCATTACTCAGAGTGCTTCTCAGTGTAATGATAAGGTGGGAGATGGAACTACTACATGCTCCATACTAACAGCAAAAGTGATTGAAGAAGTCTCAAAAGCGAAAGCTGCTGGATCTGATATTGTTAGCATAAAGA…
AF172158	Equus caballus	USA	1	GAGTTCGACGGTAAGAAGTTCATAGTGATGAAGGAGAGTGACATAATAGCTAAGGAAGCATAGTCTTATGCTACGGTTGTTTGTTCTATTGGTCTAAAGTTTAGGAGGTTCAAAAATGTCAAATACGGTAGTCACGGGTGAGGTATTAGATAAGTCTATTAGGGAGGTAGTACGCATCCTAGAAGATGCAGTTGGTTGTACTGCTGGTCCTAAAGGCCTCACTGTAGCGATTAGTAAGCCTTATGGGTCGCCAGAGATCACAAAGGATGGCTACAAGGTAATGAAGAGTATAAAGCCTGAAGAACCACTGGCTGCCGCTATAGCGAGCATCATTACTCAGAGTGCTCCTCAGTGTAATGATAAGGTGGGAGATGGAACTACTACATGCTCCATACTAAC…
AF172159	Homo sapiens	USA	1	ATGTCAAATACGGTAGTCACGGGTGAGGTATTAGATAAGTCTATTAGGGAGGTAGTACGCATCCTAGAAGATGCAGTTGGTTGTACTGCTGGTCCTAAAGGCCTCACTGTAGCGATTAGTAAGCCTTATGGGTCGCCAGAGATCACAAAGGATGGCTACAAGGTAATGAAGAGTATAAAGCCTGAAGAACCACTGGCTGCCGCTATAGCGAGCATCATTACTCAGAGTGCTTCTCAGTGTAATGATAAGGTGGGAGATGGAACTACTACATGCTCCATACTAACAGCAAAAGTGATTGAAGAAGTCTCAAAAGCGAAAGCTGCTGGATCTGATATTGTTAGCATAAAGAATGGTATTCTCAAGGCTAAGGAAGCGGTTCTTACAGCGCTTATGTCTATG…
AF172161	Equus caballus	USA	1	GAGTTCGACGGTAAGAAGTTCATAGTGATGAAGGAGAGTGACATAATAGCTAAGGAAGCATAGTCTTATGCTACGGTTGTTTGTTCTATTGGTCTAAAGTTTAGGAGGTTCAAAAATGTCAAATACGGTAGTCACGGGTGAGGTATTAGATAAGTCTATTAGGGAGGTAGTACGCATCCTAGAAGATGCAGTTGGTTGTACTGCTGGTCCTAAAGGCCTCACTGTAGCGATTAGTAAGCCTTATGGGTCGCCAGAGATCACAAAGGATGGCTACAAGGTAATGAAGAGTATAAAGCCTGAAGAACCACTGGCTGCCGCTATAGCGAGCATCATTACTCAGAGTGCTTCTCAGTGTAATGATAAGGTGGGAGATGGAACTACTACATGCTCCATACTAAC…
AF172163	Homo sapiens	USA	1	ATGTCAAATACGGTAGTCACGGGTGAGGTATTAGATAAGTCTATTAGGGAGGTAGTACGCATCCTAGAAGATGCAGTTGGTTGTACTGCTGGTCCTAAAGGCCTCACTGTAGCGATTAGTAAGCCTTATGGGTCGCCAGAGATCACAAAGGATGGCTACAAGGTAATGAAGAGTATAAAGCCTGAAGAACCACTGGCTGCCGCTATAGCGAGCATCATTACTCAGAGTGCTTCTCAGTGTAATGATAAGGTGGGAGATGGAACTACTACATGCTCCATACTAACAGCAAAAGTGATTGAAGAAGTCTCAAAAGCGAAAGCTGCTGGATCTGATATTGTTAGCATAAAGAATGGTATTCTCAAGGCTAAGGAAGCGGTTCTTACAGCGCTTATGTCTATG…
AF173988	Neotoma sp.	USA	1	TTATGCTACGGTTGTTTGTTCTATTGGTCTAAAGTTTAGGAGGTTCAAAAATGTCAAATACGGTAGTCACGGGTGAGGTATTAGATAAGTCTATTAGGGAGGTAGTACGCATCCTAGAAGATGCAGTTGGTTGTACTGCTGGTCCTAAAGGCCTCACTGTAGCGATTAGTAAGCCTTATGGGTCGCCAGAGATCACAAAGGATGGCTACAAGGTAATGAAGAGTATAAAGCCTGAAGAACCACTGGCTGCCGCTATAGCGAGCATCATTACTCAGAGTGCTTCTCAGTGTAATGATAAGGTGGGAGATGGAACTACTACATGCTCCATACTAACAGCAAAAGTGATTGAAGAAGTCTCAAAAGCGAAAGCTGCTGGATCTGATATTGTTAGCATAAAGA…
AF192796	Myodes glareolus	Switzerland	3	TTATGCTCCAGTTGTTTGTTCTATTGGTCTAAAGTTTAGGAGGTTCAAAAATGTCAAATACGGTAGTCACGGGTGAGGTGTTAGATAAGTCTATTAGGGAAGTAGTACGCATCCTCGAAGATGCAGTTGGTTGTACTGCTGGTCCTAAAGGCCTCACTGTAGCGATTAGTAAGCCTTATGGGTCGCCAGAGATCACAAAGGATGGCTACAAGGTAATGAAGAGTATAAAGCCTGAAGAACCACTGGCTGCCGCTATAGCGAGCATCATTACTCAGAGTGCTTCTCAGTGTAATGATAAGGTGGGAGATGGAACTACTACATGCTCCATACTGACAGCTAAGGTAATTGAGGAAGTCTCAAAAGCAAAAGCTGCGGGATCTGATATTGTTAGCATAAAGA…
AF383226	Capreolus capreolus	Switzerland	2	TTATGCTACGGTTGTTTGTTCTATTGGTCTAAAGTTTAGGAGGTTCAAAAATGTCAAATACGGTAGTCACGGGTGAGGTATTAGATAAGTCTATTAGGGAGGTAGTACGCATCCTAGAAGATGCAGTTGGTTGTACTGCTGGTCCTAAAGGCCTCACTGTAGCGATTAGTAAGCCTTATGGGTCGCCAGAGATCACAAAGGATGGCTACAAGGTAATGAAGAGTATAAAGCCTGAAGAACCACTGGCTGCCGCTATAGCGAGCATCATTACTCAGAGTGCTTCTCAGTGTAATGATAAGGTGGGAGATGGAACTACTACATGCTCCATACTGACAGCAAAAGTGATTGAAGAAGTCTCAAAAGCGAAAGCTGCTGGATCTGATATTGTTAGCATAAAGA…
AF383227	Capreolus capreolus	Switzerland	1	TTATGCTACGGTTGTTTGTTCTATTGGTCTAAAGTTTAGGAGGTTCAAAAATGTCAAATACGGTAGTCACGGGTGAGGTATTAGATAAGTCTATTAGGGAGGTAGTACGCATCCTAGAAGATGCAGTTGGTTGTACTGCTGGTCCTAAAGGCCTCACTGTAGCGATTAGTAAGCCTTATGGGTCGCCAGAGATCACAAAGGATGGCTACAAGGTAATGAAGAGTATAAAGCCTGAAGAACCACTGGCTGCCGCTATAGCGAGCATCATTACTCAGAGTGCTTCTCAGTGTAATGATAAGGTGGGAGATGGAACTACTACATGCTCCATACTAACAGCAAAAGTGATTGAAGAAGTCTCAAAAGCGAAAGCTGCTGGATCTGATATTGTTAGCATAAAGA…
AF478552	Cervus elaphus	Slovenia	1	TTATGCTACGGTTGTTTGTTCTATTGGTCTAAAGTTTAGGAGGTTCAAAAATGTCAAATACGGTAGTCACGGGTGAGGTATTAGATAAGTCTATTAGGGAGGTAGTACGCATCCTAGAAGATGCAGTTGGTTGTACTGCTGGTCCTAAAGGCCTCACTGTAGCGATTAGTAAGCCTTATGGGTCGCCAGAGATCACAAAGGATGGCTACAAGGTAATGAAGAGTATAAAGCCTGAAGAACCACTGGCTGCCGCTATAGCGAGCATCATTACTCAGAGTGCTTCTCAGTGTAATGATAAGGTGGGAGATGGAACTACTACATGCTCCATACTAACAGCAAAAGTGATTGAAGAAGTCTCAAAAGCGAAAGCTGCTGGATCTGATATTGTTAGCATAAAGA…
AF478553	Cervus elaphus	Slovenia	1	TTATGCTACGGTTGTTTGTTCTATTGGTCTAAAGTTTAGGAGGTTCAAAAATGTCAAATACGGTAGTCACGGGTGAGGTATTAGATAAGTCTATTAGGGAGGTAGTACGCATCCTAGAAGATGCAGTTGGTTGTACTGCTGGTCCTAAAGGCCTCACTGTAGCGATTAGTAAGCCTTATGGGTCGCCAGAGATCACAAAGGATGGCTACAAGGTAATGAAGAGTATAAAGCCTGAAGAACCACTGGCTGCCGCTATAGCGAGCATCATTACTCAGAGTGCTTCTCAGTGTAATGATAAGGTGGGAGATGGAACTACTACATGCTCCATACTAACAGCAAAAGTGATTGAAGAAGTCTCAAAAGCGAAAGCTGCTGGATCTGATATTGTTAGCATAAAGA…
AF478554	Capreolus capreolus	Slovenia	2	TTATGCTACGGTTGTTTGTTCTATTGGTCTAAAGTTTAGGAGGTTCAAAAATGTCAAATACGGTAGTCACGGGTGAGGTATTAGATAAGTCTATTAGGGAGGTAGTACGCATCCTAGAAGATGCAGTTGGTTGTACTGCTGGTCCTAAAGGCCTCACTGTAGCGATTAGTAAGCCTTATGGGTCGCCAGAGATCACAAAGGATGGCTACAAGGTAATGAAGAGTATAAAGCCTGAAGAACCACTGGCTGCCGCTATAGCGAGCATCATTACTCAGAGTGCTTCTCAGTGTAATGATAAGGTGGGAGATGGAACTACTACATGCTCCATACTGACAGCAAAAGTGATTGAAGAAGTCTCAAAAGCGAAAGCTGCTGGATCTGATATTGTTAGCATAAAGA…
AF478555	Capreolus capreolus	Slovenia	2	TTATGCTACGGTTGTTTGTTCTATTGGTCTAAAGTTTAGGAGGTTCAAAAATGTCAAATACGGTAGTCACGGGTGAGGTATTAGATAAGTCTATTAGGGAGGTAGTACGCATCCTAGAAGATGCAGTTGGTTGTACTGCTGGTCCTAAAGGCCTCACTGTAGCGATTAGTAAGCCTTATGGGTCGCCAGAGATCACAAAGGATGGCTACAAGGTAATGAAGAGTATAAAGCCTGAAGAACCACTGGCTGCCGCTATAGCGAGCATCATTACTCAGAGTGCTTCTCAGTGTAATGATAAGGTGGGAGATGGAACTACTACATGCTCCATACTGACAGCAAAAGTGATTGAAGAAGTCTCAAAAGCGAAAGCTGCTGGATCTGATATTGTTAGCATAAAGA…
AF478556	Capreolus capreolus	Slovenia	2	TTATGCTACGGTTGTTTGTTCTATTGGTCTAAAGTTTAGGAGGTTCAAAAATGTCAAATACGGTAGTCACGGGTGAGGTATTAGATAAGTCTATTAGGGAGGTAGTACGCATCCTAGAAGATGCAGTTGGTTGTACTGCTGGTCCTAAAGGCCTCACTGTAGCGATTAGTAAGCCTTATGGGTCGCCAGAGATCACAAAGGATGGCTACAAGGTAATGAAGAGTATAAAGCCTGAAGAACCACTGGCTGCCGCTATAGCGAGCATCATTACTCAGAGTGCTTCTCAGTGTAATGATAAGGTGGGAGATGGAACTACTACATGCTCCATACTGACAGCAAAAGTGATTGAAGAAGTCTCAAAAGCGAAAGCTGCTGGATCTGATATTGTTAGCATAAAGA…
AF478557	Cervus elaphus	Slovenia	1	TTATGCTACGGTTGTTTGTTCTATTGGTCTAAAGTTTAGGAGGTTCAAAAATGTCAAATACGGTAGTCACGGGTGAGGTATTAGATAAGTCTATTAGGGAGGTAGTACGCATCCTAGAAGATGCAGTTGGTTGTACTGCTGGTCCTAAAGGCCTCACTGTAGCGATTAGTAAGCCTTATGGGTCGCCAGAGATCACAAAGGATGGCTACAAGGTAATGAAGAGTATAAAGCCTGAAGAACCACTGGCTGCCGCTATAGCGAGCATCATTACTCAGAGTGCTTCTCAGTGTAATGATAAGGTGGGAGATGGAACTACTACATGCTCCATACTAACAGCAAAAGTGATTGAAGAAGTCTCAAAAGCGAAAGCTGCTGGATCTGATATTGTTAGCATAAAGA…
AF478558	Capreolus capreolus	Slovenia	1	TTATGCTACGGTTGTTTGTTCTATTGGTCTAAAGTTTAGGAGGTTCAAAAATGTCAAATACGGTAGTCACGGGTGAGGTATTAGATAAGTCTATTAGGGAGGTAGTACGCATCCTAGAAGATGCAGTTGGTTGTACTGCTGGTCCTAAAGGCCTCACTGTAGCGATTAGTAAGCCTTATGGGTCGCCAGAGATCACAAAGGATGGCTACAAGGTAATGAAGAGTATAAAGCCTGAAGAACCACTGGCTGCCGCTATAGCGAGCATCATTACTCAGAGTGCTTCTCAGTGTAATGATAAGGTGGGAGATGGAACTACTACATGCTCCATACTAACAGCAAAAGTGATTGAAGAAGTCTCAAAAGCGAAAGCTGCTGGATCTGATATTGTTAGCATAAAGA…
AF478560	Capreolus capreolus	Slovenia	2	TTATGCTACGGTTGTTTGTTCTATTGGTCTAAAGTTTAGGAGGTTCAAAAATGTCAAATACGGTAGTCACGGGTGAGGTATTAGATAAGTCTATTAGGGAGGTAGTACGCATCCTAGAAGATGCAGTTGGTTGTACTGCTGGTCCTAAAGGCCTCACTGTAGCGATTAGTAAGCCTTATGGGTCGCCAGAGATCACAAAGGATGGCTACAAGGTAATGAAGAGTATAAAGCCTGAAGAACCACTGGCTGCCGCTATAGCGAGCATCATTACTCAGAGTGCTTCTCAGTGTAATGATAAGGTGGGAGATGGAACTACTACATGCTCCATACTGACAGCAAAAGTGATTGAAGAAGTCTCAAAAGCGAAAGCTGCTGGATCTGATATTGTTAGCATAAAGA…
AF478562	Cervus elaphus	Slovenia	1	TTATGCTACGGTTGTTTGTTCTATTGGTCTAAAGTTTAGGAGGTTCAAAAATGTCAAATACGGTAGTCACGGGTGAGGTATTAGATAAGTCTATTAGGGAGGTAGTACGCATCCTAGAAGATGCAGTTGGTTGTACTGCTGGTCCTAAAGGCCTCACTGTAGCGATTAGTAAGCCTTATGGGTCGCCAGAGATCACAAAGGATGGCTACAAGGTAATGAAGAGTATAAAGCCTGAAGAACCACTGGCTGCCGCTATAGCGAGCATCATTACTCAGAGTGCTTCTCAGTGTAATGATAAGGTGGGAGATGGAACTACTACATGCTCCATACTAACAGCAAAAGTGATTGAAGAAGTCTCAAAAGCGAAAGCTGCTGGATCTGATATTGTTAGCATAAAGA…
AF478563	Cervus elaphus	Slovenia	1	TTATGCTACGGTTGTTTGTTCTATTGGTCTAAAGTTTAGGAGGTTCAAAAATGTCAAATACGGTAGTCACGGGTGAGGTATTAGATAAGTCTATTAGGGAGGTAGTACGCATCCTAGAAGATGCAGTTGGTTGTACTGCTGGTCCTAAAGGCCTCACTGTAGCGATTAGTAAGCCTTATGGGTCGCCAGAGATCACAAAGGATGGCTACAAGGTAATGAAGAGTATAAAGCCTGAAGAACCACTGGCTGCCGCTATAGCGAGCATCATTACTCAGAGTGCTTCTCAGTGTAATGATAAGGTGGGAGATGGAACTACTACATGCTCCATACTAACAGCAAAAGTGATTGAAGAAGTCTCAAAAGCGAAAGCTGCTGGATCTGATATTGTTAGCATAAAGA…
AF478564	Capreolus capreolus	Slovenia	2	TTATGCTACGGTTGTTTGTTCTATTGGTCTAAAGTTTAGGAGGTTCAAAAATGTCAAATACGGTAGTCACGGGTGAGGTATTAGATAAGTCTATTAGGGAGGTAGTACGCATCCTAGAAGATGCAGTTGGTTGTACTGCTGGTCCTAAAGGCCTCACTGTAGCGATTAGTAAGCCTTATGGGTCGCCAGAGATCACAAAGGATGGCTACAAGGTAATGAAGAGTATAAAGCCTGAAGAACCACTGGCTGCCGCTATAGCGAGCATCATTACTCAGAGTGCTTCTCAGTGTAATGATAAGGTGGGAGATGGAACTACTACATGCTCCATACTGACAGCAAAAGTGATTGAAGAAGTCTCAAAAGCGAAAGCTGCTGGATCTGATATTGTTAGCATAAAGA…
AF482760	Equus caballus	Germany	1	GAAGGAGAGTGACATAATAGCTAAGGAAGCATAGTCTTATGCTACGGTTGTTTGTTCTATTGGTCTAAAGTTTAGGAGGTTCAAAAATGTCAAATACGGTAGTCACGGGTGAGGTATTAGATAAGTCTATTAGGGAAGTAGTACGCATCCTAGAAGATGCAGTTGGTTGTACTGCTGGTCCTAAAGGCCTCACTGTAGCGATTAGTAAGCCTTATGGGTCGCCAGAGATCACAAAGGATGGCTACAAGGTAATGAAGAGTATAAAGCCTGAAGAACCACTGGCTGCCGCTATAGCGAGCATCATTACTCAGAGTGCTTCTCAGTGTAATGATAAGGTGGGAGATGGAACTACTACATGCTCCATACTAACAGCAAAAGTGATTGAAGAAGTCTCAAAAG…
AF548385	Ovis aries	Norway	1	TTATGCTACGGTTGTTTGTTCTATTGGTCTAAAGTTTAGGAGGTTCAAAAATGTCAAATACGGTAGTCACGGGTGAGGTATTAGATAAGTCTATTAGGGAGGTAGTACGCATCCTAGAAGATGCAGTTGGTTGTACTGCTGGTCCTAAAGGCCTCACTGTAGCGATTAGTAAGCCTTATGGGTCGCCAGAGATCACAAAGGATGGCTACAAGGTAATGAAGAGTATAAAGCCTGAAGAACCACTGGCTGCCGCTATAGCGAGCATCATTACTCAGAGTGCTTCTCAGTGTAATGATAAGGTGGGAGATGGAACTACTACATGCTCCATACTAACAGCAAAAGTGATTGAAGAAGTCTCAAAAGCGAAAGCTGCTGGATCTGATATTGTTAGCATAAAGA…
AF548386	Ovis aries	Norway	1	TTATGCTACGGTTGTTTGTTCTATTGGTCTAAAGTTTAGGAGGTTCAAAAATGTCAAATACGGTAGTCACGGGTGAGGTATTAGATAAGTCTATTAGGGAGGTAGTACGCATCCTAGAAGATGCAGTTGGTTGTACTGCTGGTCCTAAAGGCCTCACTGTAGCGATTAGTAAGCCTTATGGGTCGCCAGAGATCACAAAGGATGGCTACAAGGTAATGAAGAGTATAAAGCCTGAAGAACCACTGGCTGCCGCTATAGCGAGCATCATTACTCAGAGTGCTTCTCAGTGTAATGATAAGGTGGGAGATGGAACTACTACATGCTCCATACTAACAGCAAAAGTGATTGAAGAAGTCTCAAAAGCGAAAGCTGCTGGATCTGATATTGTTAGCATAAAGA…
APFG	Tick cells (originally caprine)	UK	duplicate	CGGATATCTTTCGCCTTACTTTGTTACAAATGCTGAAAAAATGCTGGTGGAATTTGAAAATCCATACATATTCCTTACTGAAAAGAAGATTAATCTTGTACAAAGCATTCTACCAATCTTAGAAAACGTTGCACGGTCTGGAAGGCCATTGCTCATCATAGCTGAAGACGTTGAAGGTGAAGCTCTTAGCACGCTTGTACTCAATAAGCTCCGTGGTGGCCTTCAAGTTGCTGCTGTAAAGGCGCCTGGTTTTGGTGACAGGAGAAAAGACATGCTTGGCGATATTGCTGTAATAGTAGGCGCTAAGTATGTAGTAAATGACGAGCTTGCTGTTAAGATGGAAGACATCGCTCTAAGCGATCTTGGTACTGCTAAGAGCGTACGCATCACAAAAGACGC…
AWD62fd	Dama dama	Netherlands	1	GGATATCTTTCGCCTTACTTTGTTACAAATGCTGAAAAAATGCTGGTGGAATTTGAAAATCCATACATATTCCTTACTGAAAAGAAGATTAATCTTGTACAAAGCATTCTACCAATCTTAGAAAACGTTGCACGGTCTGGAAGACCATTGCTCATCATAGCTGAAGACGTTGAAGGTGAAGCTCTGAGCACGCTTGTACTCAATAAGCTCCGTGGTGGCCTTCAAGTTGCTGCTGTAAAGGCGCCTGGTTTTGGTGACAGGAGAAAAGACATGCTTGGCGATATTGCTGTAATAGTAGGCGCTAAGTATGTAGTAAATGACGAGCTTGCTGTTAAGATGGAAGATATCGCTCTAAGCGATCTTGGTACTGCTAAGAGCGTACGCATCACAAAAGACGCA…
AY219849	Canis familiaris	USA	1	TTATGCTACGGTTGTTTGTTCTATTGGTCTAAAGTTTAGGAGGTTCAAAAATGTCAAATACGGTAGTCACGGGTGAGGTATTAGATAAGTCTATTAGGGAGGTAGTACGCATCCTAGAAGATGCAGTTGGTTGTACTGCTGGTCCTAAAGGCCTCACTGTAGCGATTAGTAAGCCTTATGGGTCGCCAGAGATCACAAAGGATGGCTACAAGGTAATGAAGAGTATAAAGCCTGAAGAACCACTGGCTGCCGCTATAGCGAGCATCATTACTCAGAGTGCTTCTCAGTGTAATGATAAGGTGGGAGATGGAACTACTACATGCTCCATACTAACGGCAAAAGTGATTGAAGAAGTCTCAAAAGCGAAAGCTGCTGGATCTGATATTGTTAGCATAAAGA…
AY220467	Capreolus capreolus	Austria	2	TTATGCTACGGTTGTTTGTTCTATTGGTCTAAAGTTTAGGAGGTTCAAAAATGTCAAATACGGTAGTCACGGGTGAGGTATTAGATAAGTCTATTAGGGAGGTAGTACGCATCCTAGAAGATGCAGTTGGTTGTACTGCTGGTCCTAAAGGCCTCACTGTAGCGATTAGTAAGCCTTATGGGTCGCCAGAGATCACAAAGGATGGCTACAAGGTAATGAAGAGTATAAAGCCTGAAGAACCACTGGCTGCCGCTATAGCGAGCATCATTACTCAGAGTGCTTCTCAGTGTAATGATAAGGTGGGAGATGGAACTACTACATGCTCCATACTGACAGCAAAAGTGATTGAAGAAGTCTCAAAAGCGAAAGCTGCTGGATCTGATATTGTTAGCATAAAGA…
AY220468	Capreolus capreolus	Czech Republic	2	TTATGCTACGGTTGTTTGTTCTATTGGTCTAAAGTTTAGGAGGTTCAAAAATGTCAAATACGGTAGTCACGGGTGAGGTATTAGATAAGTCTATTAGGGAGGTAGTACGCATCCTAGAAGATGCAGTTGGTTGTACTGCTGGTCCTAAAGGCCTCACTGTAGCGATTAGTAAGCCTTATGGGTCGCCAGAGATCACAAAGGATGGCTACAAGGTAATGAAGAGTATAAAGCCTGAAGAACCACTGGCTGCCGCTATAGCGAGCATCATTACTCAGAGTGCTTCTCAGTGTAATGATAAGGTGGGAGATGGAACTACTACATGCTCCATACTGACAGCAAAAGTGATTGAAGAAGTCTCAAAAGCGAAAGCTGCTGGATCTGATATTGTTAGCATAAAGA…
AY220469	Capreolus capreolus	Austria	2	TTATGCTACGGTTGTTTGTTCTATTGGTCTAAAGTTTAGGAGGTTCAAAAATGTCAAATACGGTAGTCACGGGTGAGGTATTAGATAAGTCTATTAGGGAGGTAGTACGCATCCTAGAAGATGCAGTTGGTTGTACTGCTGGTCCTAAAGGCCTCACTGTAGCGATTAGTAAGCCTTATGGGTCGCCAGAGATCACAAAGGATGGCTACAAGGTAATGAAGAGTATAAAGCCTGAAGAACCACTGGCTGCCGCTATAGCGAGCATCATTACTCAGAGTGCTTCTCAGTGTAATGATAAGGTGGGAGATGGAACTACTACATGCTCCATACTGACAGCAAAAGTGATTGAAGAAGTCTCAAAAGCGAAAGCTGCTGGATCTGATATTGTTAGCATAAAGA…
AY279085	Capra aegagrus	Albania	1	TTATGCTCCGGTTGTTTGTTCTATTGGTCTAAAGTTTAGGAGGTTCAAAAATGTCAAATACGGTAGTCACGGGTGAGGTGTTAGATAAGTCTATTAGGGAGGTAGTACGCATCCTCGAAGATGCAGTTGGTTGTACTGCTGGTCCTAAAGGCCTCACTGTAGCGATTAGTAAGCCTTATGGGTCGCCAGAGATCACAAAGGATGGCTACAAGGTAATGAAGAGTATAAAGCCTGAAGAACCACTGGCTGCCGCTATAGCGAGCATCATTACTCAGAGTGCTTCTCAGTGTAATGATAAGGTGGGAGATGGAACTACTACATGCTCCATACTGACAGCTAAGGTAATTGAAGAAGTTTCAAAAGCAAAAGCTGCAGGGTCTGACATTGTTAGCATCAAGA…
AY529489	Equus caballus	Sweden	1	TTATGCTACGGTTGTTTGTTCTATTGGTCTAAAGTTTAGGAGGTTCAAAAATGTCAAATACGGTAGTCACGGGTGAGGTATTAGATAAGTCTATTAGGGAGGTAGTACGCATCCTAGAAGATGCAGTTGGTTGTACTGCTGGTCCTAAAGGCCTCACTGTAGCGATTAGTAAGCCTTATGGGTCGCCAGAGATCACAAAGGATGGCTACAAGGTAATGAAGAGTATAAAGCCTGAAGAACCACTGGCTGCCGCTATAGCGAGCATCATTACTCAGAGTGCTTCTCAGTGTAATGATAAGGTGGGAGATGGAACTACTACATGCTCCATACTAACAGCAAAAGTGATTGAAGAAGTCTCAAAAGCGAAAGCTGCTGGATCTGATATTGTTAGCATAAAGA…
AY529490	Equus caballus	Sweden	1	TTATGCTACGGTTGTTTGTTCTATTGGTCTAAAGTTTAGGAGGTTCAAAAATGTCAAATACGGTAGTCACGGGTGAGGTATTAGATAAGTCTATTAGGGAAGTAGTACGCATCCTAGAAGATGCAGTTGGTTGTACTGCTGGTCCTAAAGGCCTCACTGTAGCGATTAGTAAGCCTTATGGGTCGCCAGAGATCACAAAGGATGGCTACAAGGTAATGAAGAGTATAAAGCCTGAAGAACCACTGGCTGCCGCTATAGCGAGCATCATTACTCAGAGTGCTTCTCAGTGTAATGATAAGGTGGGAGATGGAACTACTACATGCTCCATACTAACAGCAAAAGTGATTGAAGAAGTCTCAAAAGCGAAAGCTGCTGGATCTGATATTGTTAGCATAAAGA…
AY626252	Sigmodon hispidus	USA	1	TTATGCTACAGTTGTTTGTTCTATTAGTCTAAAGTTTAGGAGGTTCAAAAATGTCAAATACGGTAGTCACGGGTGAGGTATTAGATAAGTCTATTAGGGAGGTAGTACGCATCCTAGAAGATGCAGTTGGTTGTACTGCTGGTCCTAAAGGCCTCACTGTAGCGATTAGTAAGCCTTATGGGTCGCCAGAGATCACAAAGGATGGCTACAAGGTAATGAAGAGTATAAAGCCTGAAGAACCACTGGCTGCCGCTATAGCGAGCATCATTACTCAGAGTGCTTCTCAGTGTAATGATAAGGTGGGAGATGGAACTACTACATGCTCCATACTAACAGCAAAAGTGATTGAAGAAGTCTCAAAAGCGAAAGCTGCTGGATCTGATATTGTTAGCATAAAGA…
AY848747	Equus caballus	Italy	1	GGATATCTTTCGCCTTACTTTGTTACGAATGCTGAAAAAATGCTGGTGGAATTTGAAAATCCATACATATTCCTTACTGAAAAGAAGATTAATCTTGTACAAAGCATTCTACCAATCTTAGAAAACGTTGCACGGTCTGGAAGACCATTGCTCATCATAGCTGAAGACGTTGAAGGTGAAGCTCTGAGCACGCTTGTACTCAATAAGCTCCGTGGTGGCCTTCAAGTTGCTGCTGTAAAGGCGCCTGGTTTCGGTGACAGAAGAAAAGACATGCTTGGCGATATTGCTGTAATAGTAGGCGCTAAGTATGTAGTAAATGACGAGCTTGCTGTTAAGATGGAAGACATCGCTCTAAGCGATCTTGGTACTGCTAAGAGCGTGCGAATCACAAAAGACGCA…
AY848748	Equus caballus	Italy	1	GGATATCTTTCGCCTTACTTTGTTACAAATGCTGAAAAAATGCTGGTGGAATTTGAAAATCCATACATATTCCTTACTGAAAAGATGATTAATCTTGTACAAAGCATTCTATCAATCTTGGAAAACGTTGCACGGTCTGGAAGACCATTGCTCATCATAGCTGAAGACGTTGAAGGTGAAGCTCTGAGCACGCTTGTACTCAATAAGCTCCGTGGTGGCCTTCAAGTTGCTGCTGTAAAGGCGCCTGGTTTCGGTGACAGAAGAAAAGACATGCTTGGCGATATTGCTGTAATAGTAGGCGCTAAGTATGTAGTAAATGACGAGCTTGCTGTTAAGATGGAAGACATCGCTCTAAGCGATCTTGGTACTGCTAAGAGCGTGCGAATCACAGAAGACGCA…
AY848749	Equus caballus	Italy	1	GGATTTCTTTCGCCTTACTTTGTTACAAATGCTGAAAAAATGCTGGTGGAATTTGAAAATCCATACATATTCCTTACTGAAAAGAAGATTAATCTTGTACAAAGCATTCTACCAATCTTAGAAAACGTTGCACGGTCTGGAAGACCATTGCTCATCATAGCTGAAGACGTTGAAGGTGAAGCTCTGAGCACGCTTGTACTCAATAAGCTCCGTGGTGGCCTTCAAGTTGCTGCTGTAAAGGCGCCTGGTTTCGGTGACAGAAGAAAAGACATGCTTGGCGATATTGCTGTAATAGTAGGCGCTAAGTATGTAGTAAATGACGAGCTTGCTGTTAAGATGGAAGACATCGCTCTAAGCGATCTTGGTACTGCTAAGAGCGTGCGAATCACAAAAGACGCA…
AY848750	Canis familiaris	Italy	1	GGATATCTTTCGCCTTACTTTGTTACAAATGCTGAAAAAATGCTGGTGGAATTTGAAAATCCATACATATTCCTTACTGAAAAGAAGATTAATCTTGTACAAAGCATTCTACCAATCTTAGAAAACGTTGCACGGTCTGGAAGACCATTGCTCATCATAGCTGAAGACGTTGAAGGTGAAGCTCTGAGCACGCTTGTACTCAATAAGCTCCGTGGTGGCCTTCAAGTTGCTGCTGTAAAGGCGCCTGGTTTCGGTGACAGAAGAAAAGACATGCTTGGCGATATTGCTGTAATAGTAGGCGCTAAGTATGTAGTAAATGACGAGCTTGCTGTTAAGATGGAAGACATCGCACTAAGCGATCTTGGTACTGCTAAGAGCGTGCGAATCACAAAAGACGCA…
AY848751	Canis familiaris	Italy	1	GGATATCTTTCGCCTTACTTTGTTACAAATGCTGAAAAAATGCTGGTGGAATTTGAAAATCCATACATATTCCCTACTGAAAAGAAGATTAATCTTGTACAAAGCATTCTACCAATCTTAGAAAACGTTGCACGGTCCGGAAGACCATTGCTCATCATAGCTGAAGACGTTGAAGGTGAAGCTCTGAGCACGCTTGTACTCAATAAGCTCCGTGGTGGCCTTCAAGTTGCTGCTGTAAAGGCGCCTGGTTTCGGTGACAGAAGAAAAGACATGCTTGGCGATATTGCTGTAATAGTAGGCGCTAAGTATGTAGTAAATGACGAGCTTGCTGTTAAGATGGAAGACATCGCTCTAAGCGATCTTGGTACTGCTAAGAGCGTGCGAATCACAAAAGACGCA…
AY848752	Canis familiaris	Italy	1	GGATATCTTTCGCCTTACTTTGTTACAAATGCTGAAAAAATGCTGGTGGAATTTGAAAATCCATACATATTCCTTACTGAAAAGAAGATTAATCTTGTACAAAGCATTCTACCAATCTTAGAAAACGTTGCACGGTCTGGAAGACCATTGCTCATCATAGCTGAAGACGTTGAAGGTGAAGCTCTGAGCACGCTTGTACTCAATAAGCTCCGTGGTGGCCTTCAAGTTGCTGCTGTAAAGGCGCCTGGTTTCGGTGACAGAAGAAAAGACATGCTTGGCGATATTGCTGTAATAGTAGGCGCTAAGTATGTAGTAAATGACGAGCTTGCTGTTAAGATGGAAGACATCGCTCTAAGCGATCTTGGTACTGCTAAGAGCGTGCGAATCACAAAAGACGCA…
BelgiumPatient2014	Homo sapiens	Belgium	1	GGATATCTTTCGCCTTACTTTGTTACAAATGCTGAAAAAATGCTGGTGGAATTTGAAAATCCATACATATTCCTTACTGAAAAGAAGATTAATCTTGTACAAAGCATTCTACCAATCTTAGAAAACGTTGCACGGTCTGGAAGACCATTGCTCATCATAGCTGAAGACGTTGAAGGTGAAGCTCTTAGCACGCTTGTACTCAATAAGCTCCGTGGTGGCCTTCAAGTTGCTGCTGTAAAGGCGCCTGGTTTTGGTGACAGGAGAAAAGACATGCTTGGCGATATTGCTGTAATAGTAGGCGCTAAGTATGTAGTAAATGACGAGCTTGCTGTTAAGATGGAAGATATCGCTCTAAGCGATCTTGGTACTGCTAAGAGCGTACGCATCACAAAAGACGCA…
BK18Sheep59733	Ovis aries	Netherlands	1	GGATATCTTTCGCCTTACTTTGTTACAAATGCTGAAAAAATGCTGGTGGAATTTGAAAATCCATACATATTCCTTACTGAAAAGAAGATTAATCTTGTACAAAGCATTCTACCAATCTTAGAAAACGTTGCACGGTCTGGAAGACCATTGCTCATCATAGCTGAAGACGTTGAAGGTGAAGCTCTTAGCACGCTTGTACTCAATAAGCTCCGTGGTGGCCTTCAAGTTGCTGCTGTAAAGGCGCCTGGTTTTGGTGACAGGAGAAAAGACATGCTTGGCGATATTGCTGTAATAGTAGGCGCTAAGTATGTAGTAAATGACGAGCTTGCTGTTAAGATGGAAGACATCGCTCTAAGCGATCTTGGTACTGCTAAGAGCGTACGCATCACAAAAGACGCA…
BK26Sheep11935	Ovis aries	Netherlands	1	GGATATCTTTCGCCTTACTTTGTTACAAATGCTGAAAAAATGCTGGTGGAATTTGAAAATCCATACATATTCCTTACTGAAAAGAAGATTAATCTTGTACAAAGCATTCTACCAATCTTAGAAAACGTTGCACGGTCTGGAAGGCCATTGCTCATCATAGCTGAAGACGTTGAAGGTGAAGCTCTTAGCACGCTTGTACTCAATAAGCTCCGTGGTGGCCTTCAAGTTGCTGCTGTAAAGGCGCCTGGTTTTGGTGACAGGAGAAAAGACATGCTTGGCGATATTGCTGTAATAGTAGGCGCTAAGTATGTAGTAAATGACGAGCTTGCTGTTAAGATGGAAGATATCGCTCTAAGCGATCTTGGTACTGCTAAGAGCGTACGCATCACAAAAGACGCA…
BK9SheepNLx7	Ovis aries	Netherlands	1	GGATATCTTTCGCCTTACTTTGTTACAAATGCTGAAAAAATGCTGGTGGAATTTGAAAATCCATACATATTTCTTACTGAAAAGAAGATTAATCTTGTACAAAGCATTCTACCAATCTTAGAAAACGTTGCACGGTCTGGAAGACCATTGCTCATCATAGCTGAAGACGTTGAAGGTGAAGCTCTGAGCACGCTTGTACTCAATAAGCTCCGTGGTGGCCTTCAAGTTGCTGCTGTAAAGGCGCCTGGTTTCGGTGACAGGAGAAAAGACATGCTTGGCGATATTGCTGTAATAGTAGGCGCTAAGTATGTAGTAAATGACGAGCTTGCTGTTAAGATGGAAGACATCGCTCTAAGCGATCTTGGTACTGCTAAGAGCGTACGCATCACAAAAGACGCA…
Deerspleen-2012-1	roe deer	Netherlands	2	AACGTTGCGAGAGCTGGTAGACCATTGCTTATCATAGCTGAAGATGTTGAAGGTGAAGCTCTGAGCACGCTTGTACTCAATAAGCTCCGTGGTGGGCTTCAAGTTGCTGCTGTAAAGGCGCCTGGTTTCGGTGACAGAAGAAAAGACATGCTAGGCGATATTGCCGTAATAGTAGGCGCTAAGTATGTAGTAAATGACGAGCTTGCTGTTAAGATGGAAGATATCGCTCTAAGCGATCTTGGTACTGCTAAGAGCGTGCGCATCACAAAAGACGCAACTACTATTATAGGTAGTGTTGATAGCAGTTCTGAAAGCATAGCTAGCAGGACTAATCAAATCAAAGCTCA
Deerspleen-2012-12	Capreolus capreolus	Netherlands	2	CTGGTGGAATTTGAAAATCCATACATATTCCTTACTGAAAAGAAGATTAATCTTGTACAAAGCATTTTACCAATATTAGAAAACGTTGCGAGAGCTGGTAGACCATTGCTTATCATAGCTGAAGATGTTGAAGGTGAAGCTCTGAGCACGCTTGTACTCAATAAGCTCCGTGGTGGGCTTCAAGTTGCTGCTGTAAAGGCGCCTGGTTTCGGTGACAGAAGAAAAGACATGCTAGGCGATATTGCCGTAATAGTAGGCGCTAAGTATGTAGTAAATGACGAGCTTGCTGTTAAGATGGAAGATATCGCTCTAAGCGATCTTGGTACTGCTAAGAGCGTGCGCATCACAAAAGACGCAACTACTATCATAGGTAGTGTTGATAGCAGTTCTGAAAGCATA…
Deerspleen-2012-14	Capreolus capreolus	Netherlands	2	GGTATGCAGTTTGATCGCGGATATCTTTCGCCTTACTTTGTTACAAATGCTGAAAAAATGCTGGTGGAATTTGAAAATCCATACATATTCCTTACTGAAAAGAAGATTAATCTTGTACAAAGCATTTTACCAATATTAGAAAACGTTGCGAGAGCTGGTAGACCATTGCTTATCATAGCTGAAGATGTTGAAGGTGAAGCTCTGAGCACGCTTGTACTCAATAAGCTCCGTGGTGGGCTTCAAGTTGCTGCTGTAAAGGCGCCTGGTTTCGGTGACAGAAGAAAAGACATGCTAGGCGATATTGCCGTAATAGTAGGCGCTAAGTATGTAGTAAATGACGAGCTTGCTGTTAAGATGGAAGATATCGCTCTAAGCGATCTTGGTACTGCTAAGAGCGTG…
Deerspleen-2012-18	Capreolus capreolus	Netherlands	2	GGTATGCAGTTTGATCGCGGATATCTTTCGCCTTACTTTGTTACAAATGCTGAAAAAATGCTGGTGGAATTTGAAAATCCATACATATTCCTTACTGAAAAGAAGATTAATCTTGTACAAAGCATTTTACCAATATTAGAAAACGTTGCGAGAGCTGGTAGACCATTGCTTATCATAGCTGAAGATGTTGAAGGTGAAGCTCTGAGCACGCTTGTACTCAATAAGCTCCGTGGTGGGCTTCAAGTTGCTGCTGTAAAGGCGCCTGGTTTCGGTGACAGAAGAAAAGACATGCTAGGCGATATTGCCGTAATAGTAGGCGCTAAGTATGTAGTAAATGACGAGCTTGCTGTTAAGATGGAAGATATCGCTCTAAGCGATCTTGGTACTGCTAAGAGCGTG…
Deerspleen-2012-2	Capreolus capreolus	Netherlands	2	GGTATGCAGTTTGATCGCGGATATCTTTCGCCTTACTTTGTTACAAATGCTGAAAAAATGCTGGTGGAATTTGAAAATCCATACATATTCCTTACTGAAAAGAAGATTAATCTTGTACAAAGCATTCTACCAATATTAGAAAACGTTGCGAGAGCTGGTAGACCATTGCTTATCATAGCTGAAGATGTTGAAGGTGAAGCTCTGAGCACGCTTGTACTCAATAAGCTCCGTGGTGGGCTTCAAGTTGCTGCTGTAAAGGCGCCTGGTTTCGGTGACAGAAGAAAAGACATGCTAGGCGATATTGCCGTAATAGTAGGCGCTAAGTATGTAGTAAATGACGAGCTTGCTGTTAAGATGGAAGATATCGCTCTAAGCGATCTTGGTACTGCTAAGAGCGTG…
Deerspleen-2012-20	Capreolus capreolus	Netherlands	1	TGATGGTATGCAGTTTGATCGCGGATATCTTTCGCCTTACTTTGTTACAAATGCTGAAAAAATGCTGGTGGAATTTGAAAATCCATACATATTCCTTACTGAAAAGAAGATTAATCTTGTACAAAGCATTTTACCAATCTTAGAAAACGTTGCACGGTCTGGAAGACCATTGCTCATCATAGCTGAAGACGTTGAAGGTGAAGCTCTGAGCACGCTTGTACTCAATAAGCTCCGTGGTGGCCTTCAAGTTGCTGCTGTAAAGGCGCCTGGTTTCGGTGACAGAAGAAAAGACATGCTTGGCGATATTGCTGTAATAGTAGGCGCTAAGTATGTAGTAAATGACGAGCTTGCTGTTAAGATGGAAGACATCGCTCTAAGCGATCTTGGTACTGCTAAGAG…
Deerspleen-2012-22	Capreolus capreolus	Netherlands	2	GGTATGCAGTTTGATCGCGGATATCTTTCGCCTTACTTTGTTACAAATGCTGAAAAAATGCTGGTGGAATTTGAAAATCCATACATATTCCTTACTGAAAAGAAGATTAATCTTGTACAAAGCATTTTACCAATATTAGAAAACGTTGCGAGAGCTGGTAGACCATTGCTTATCATAGCTGAAGATGTTGAAGGTGAAGCTCTGAGCACGCTTGTACTCAATAAGCTCCGTGGTGGGCTTCAAGTTGCTGCTGTAAAGGCGCCTGGTTTCGGTGACAGAAGAAAAGACATGCTAGGCGATATTGCCGTAATAGTAGGCGCTAAGTATGTAGTAAATGACGAGCTTGCTGTTAAGATGGAAGATATCGCTCTAAGCGATCTTGGTACTGCTAAGAGCGTG…
Deerspleen-2012-23	Capreolus capreolus	Netherlands	2	GGTATGCAGTTTGATCGCGGATATCTTTCGCCTTACTTTGTTACAAATGCTGAAAAAATGCTGGTGGAATTTGAAAATCCATACATATTCCTTACTGAAAAGAAGATTAATCTTGTACAAAGCATTCTACCAATATTAGAAAACGTTGCGAGAGCTGGTAGACCATTGCTTATCATAGCTGAAGATGTTGAAGGTGAAGCTCTGAGCACGCTTGTACTCAATAAGCTCCGTGGTGGGCTTCAAGTTGCTGCTGTAAAGGCGCCTGGTTTCGGTGACAGAAGAAAAGACATGCTAGGCGATATTGCCGTAATAGTAGGCGCTAAGTATGTAGTAAATGACGAGCTTGCTGTTAAGATGGAAGATATCGCTCTAAGCGATCTTGGTACTGCTAAGAGCGTG…
Deerspleen-2012-26	Capreolus capreolus	Netherlands	1	TGAAAATCCATACATATTCCTTACTGAAAAGAAGATTAATCTTGTACAAAGCATTCTACCAATCTTAGAAAACGTTGCACGGTCTGGAAGACCATTGCTCATCATAGCTGAAGACGTTGAAGGTGAAGCTCTGAGCACGCTTGTACTCAATAAGCTCCGTGGTGGCCTTCAAGTTGCTGCTGTAAAGGCGCCTGGTTTCGGTGACAGAAGAAAAGACATGCTTGGCGATATTGCTGTAATAGTAGGTGCTAAGTATGTAGTAAATGACGAGCTTGCTGTTAAGATGGAAGACATCGCTCTAAGCGATTTGGGTACTGCTAAGAGCGTACGCATCACAAAAGACGCAACTACTATCATAGGTAGTGTTGATAGCAGTTCTGAAAGCATAGCTAGCAGGAC…
Deerspleen-2012-28	Capreolus capreolus	Netherlands	2	CTTTGTTACAAATGCTGAAAAAATGCTGGTGGAATTTGAAAATCCATACATATTCCTTACTGAAAAGAAGATTAATCTTGTACAAAGCATTTTACCAATATTAGAAAACGTTGCGAGAGCTGGTAGACCATTGCTTATCATAGCTGAAGATGTTGAAGGTGAAGCTCTGAGCACGCTTGTACTCAATAAGCTCCGTGGTGGGCTTCAAGTTGCTGCTGTAAAGGCGCCTGGTTTCGGTGACAGAAGAAAAGACATGCTAGGCGATATTGCCGTAATAGTAGGCGCTAAGTATGTAGTAAATGACGAGCTTGCTGTTAAGATGGAAGATATCGCTCTAAGCGATCTTGGTACTGCTAAGAGCGTGCGCATCACAAAAGACGCAACTACTATCATAGGTAG…
Deerspleen-2012-3	Capreolus capreolus	Netherlands	2	GGTATGCAGTTTGATCGCGGATATCTTTCGCCTTACTTTGTTACAAATGCTGAAAAAATGCTGGTGGAATTTGAAAATCCATACATATTCCTTACTGAAAAGAAGATTAATCTTGTACAAAGCATTCTACCAATATTAGAAAACGTTGCGAGAGCTGGTAGACCATTGCTTATCATAGCTGAAGATGTTGAAGGTGAAGCTCTGAGCACGCTTGTACTCAATAAGCTCCGTGGTGGGCTTCAAGTTGCTGCTGTAAAGGCGCCTGGTTTCGGTGACAGAAGAAAAGACATGCTAGGCGATATTGCCGTAATAGTAGGCGCTAAGTATGTAGTAAATGACGAGCTTGCTGTTAAGATGGAAGATATCGCTCTAAGCGATCTTGGTACTGCTAAGAGCGTG…
Deerspleen-2012-6	Capreolus capreolus	Netherlands	2	ATGGTATGCAGTTTGATCGCGGATATCTTTCGCCTTACTTTGTTACAAATGCTGAAAAAATGCTGGTGGAATTTGAAAATCCATACATATTCCTTACTGAAAAGAAGATTAATCTTGTACAAAGCATTCTACCAATATTAGAAAACGTTGCGAGAGCTGGTAGACCATTGCTTATCATAGCTGAAGATGTTGAAGGTGAAGCTCTGAGCACGCTTGTACTCAATAAGCTCCGTGGTGGGCTTCAAGTTGCTGCTGTAAAGGCGCCTGGTTTCGGTGACAGAAGAAAAGACATGCTAGGCGATATTGCCGTAATAGTAGGCGCTAAGTATGTAGTAAATGACGAGCTTGCTGTTAAGATGGAAGATATCGCTCTAAGCGATCTTGGTACTGCTAAGAGCG…
Deerspleen-2012-8	Capreolus capreolus	Netherlands	2	GTATGCAGTTTGATCGCGGATATCTTTCGCCTTACTTTGTTACAAATGCTGAAAAAATGCTGGTGGAATTTGAAAATCCATACATATTCCTTACTGAAAAGAAGATTAATCTTGTACAAAGCATTCTACCAATATTAGAAAACGTTGCGAGAGCTGGTAGACCATTGCTTATCATAGCTGAAGATGTTGAAGGTGAAGCTCTGAGCACGCTTGTACTCAATAAGCTCCGTGGTGGGCTTCAAGTTGCTGCTGTAAAGGCGCCTGGTTTCGGTGACAGAAGAAAAGACATGCTAGGCGATATTGCCGTAATAGTAGGCGCTAAGTATGTAGTAAATGACGAGCTTGCTGTTAAGATGGAAGATATCGCTCTAAGCGATCTTGGTACTGCTAAGAGCGTGC…
Deerspleen-2012-9	Capreolus capreolus	Netherlands	2	GGTATGCAGTTTGATCGCGGATATCTTTCGCCTTACTTTGTTACAAATGCTGAAAAAATGCTGGTGGAATTTGAAAATCCATACATATTCCTTACTGAAAAGAAGATTAATCTTGTACAAAGCATTTTACCAATATTAGAAAACGTTGCGAGAGCTGGTAGACCATTGCTTATCATAGCTGAAGATGTTGAAGGTGAAGCTCTGAGCACGCTTGTACTCAATAAGCTCCGTGGTGGGCTTCAAGTTGCTGCTGTAAAGGCGCCTGGTTTCGGTGACAGAAGAAAAGACATGCTAGGCGATATTGCCGTAATAGTAGGCGCTAAGTATGTAGTAAATGACGAGCTTGCTGTTAAGATGGAAGATATCGCTCTAAGCGATCTTGGTACTGCTAAGAGCGTG…
DQ088133	Sylvilagus floridanus	USA	1	GTTCTATTGGTCTAAAGTTTAGGAGGTTCGAAAATGTCAAATACGGTAGTCACGGGTGAGGTATTAGATAAGTCTATTAGGGAGGTAGTACGCATCCTAGAAGATGCAGTTGGTTGTACTGCTGGTCCTAAAGGCCTCACTGTAGCGATTAGTAAGCCTTATGGGTCGCCAGAGATCACAAAGGATGGCTACAAGGTAATGAAGAGTATAAAGCCTGAAGAACCACTGGCTGCCGCTATAGCGAGCATCATTACTCAGAGTGCTTCTCAGTGTAATGATAAGGTGGGAGATGGAACTACTACATGCTCCATACTAACAGCAAAAGTGATTGAAGAAGTCTCAAAAGCGAAAGCTGCTGGATCTGATATTGTTAGCATAAAGAATGGTATTCTCAAGGCT…
DQ680012	Felis catus	USA	1	TTATGCTACGGTTGTTTGTTCTATTGGTCTAAAGTTTAGGAGGTTCAAAAATGTCAAATACGGTAGTCACGGGTGAGGTATTAGATAAGTCTATTAGGGAGGTAGTACGCATCCTAGAAGATGCAGTTGGTTGTACTGCTGGTCCTAAAGGCCTCACTGTAGCGATTAGTAAGCCTTATGGGTCGCCAGAGATCACAAAGGATGGCTACAAGGTAATGAAGAGTATAAAGCCTGAAGAACCACTGGCTGCCGCTATAGCGAGCATCATTACTCAGAGTGCTTCTCAGTGTAATGATAAGGTGGGAGATGGAACTACTACATGCTCCATACTAACGGCAAAAGTGATTGAAGAAGTCTCAAAAGCGAAAGCTGCTGGATCTGATATTGTTAGCATAAAGA…
DQ779568	Capreolus capreolus	Poland	2	TTTAGGAGGTTCAAAAATGTCAAATACGGTAGTCACGGGTGAGGTATTAGATAAGTCTATTAGGGAGGTAGTACGCATCCTAGAAGATGCAGTTGGTTGTACTGCTGGTCCTAAAGGCCTCACTGTAGCGATTAGTAAGCCTTATGGGTCGCCAGAGATCACAAAGGATGGCTACAAGGTAATGAAGAGTATAAAGCCTGAAGAACCACTGGCTGCCGCTATAGCGAGCATCATTACTCAGAGTGCTTCTCAGTGTAATGATAAGGTGGGAGATGGAACTACTACATGCTCCATACTGACAGCAAAAGTGATTGAAGAAGTCTCAAAAGCGAAAGCTGCTGGATCTGATATTGTTAGCATAAAGAATGGTATTCTCAAGGCTAAGGAAGCGGTTCTTAC…
EF647585	Equus caballus	USA	1	TTATGCTACGGTTGTTTGTTCTATTGGTCTAAAGTTTAGGAGGTTCAAAAATGTCAAATACGGTAGTCACGGGTGAGGTATTAGATAAGTCTATTAGGGAGGTAGTACGCATCCTAGAAGATGCAGTTGGTTGTACTGCTGGTCCTAAAGGCCTCACTGTAGCGATTAGTAAGCCTTATGGGTCGCCAGAGATCACAAAGGATGGCTACAAGGTAATGAAGAGTATAAAGCCTGAAGAACCACTGGCTGCCGCTATAGCGAGCATCATTACTCAGAGTGCTTCTCAGTGTAATGATAAGGTGGGAGATGGAACTACTACATGCTCCATACTAACAGCAAAAGTGATTGAAGAAGTCTCAAAAGCGAAAGCTGCTGGATCTGATATTGTTAGCATAAAGA…
EHV112	Cervus elaphus	Netherlands	1	GGTATGCAGTTTGATCGCGGATATCTTTCGCCTTACTTTGTTACAAATGCTGAAAAAATGCTGGTGGAATTTGAAAATCCATACATATTCCTTACTGAAAAGAAGATTAATCTTGTACAAAGCATTCTACCAATCTTAGAAAACGTTGCACGGTCTGGAAGACCATTGCTCATCATAGCTGAAGACGTTGAAGGTGAAGCTCTGAGCACGCTTGTACTCAATAAGCTCCGTGGTGGCCTTCAAGTTGCTGCTGTAAAGGCGCCTGGTTTCGGTGACAGGAGAAAAGACATGCTTGGCGATATTGCTGTAATAGTAGGCGCTAAGTATGTAGTAAATGACGAGCTTGCTGTTAAGATGGAAGATATCGCTCTAAGCGATCTTGGTACTGCTAAGAGCGTA…
EHV118	Cervus elaphus	Netherlands	1	ATGGTATGCAGTTTGATCGCGGATATCTTTCGCCTTACTTTGTTACAAATGCTGAAAAAATGCTGGTGGAATTTGAAAATCCATACATATTCCTTACTGAAAAGAAGATTAATCTTGTACAAAGCATTCTACCAATCTTAGAAAACGTTGCACGGTCTGGAAGACCATTGCTCATCATAGCTGAAGACGTTGAAGGTGAAGCTCTTAGCACGCTTGTACTCAATAAGCTCCGTGGTGGCCTTCAAGTTGCTGCTGTAAAGGCGCCTGGTTTTGGTGACAGGAGAAAAGACATGCTTGGCGATATTGCTGTAATAGTAGGCGCTAAGTATGTAGTAAATGACGAGCTTGCTGTTAAGATGGAAGATATCGCTCTAAGCGATCTTGGTACTGCTAAGAGCG…
EHV15	Cervus elaphus	Netherlands	1	GGTATGCAGTTTGATCGCGGATATCTTTCGCCTTACTTTGTTACAAATGCTGAAAAAATGCTGGTGGAATTTGAAAATCCATACATATTCCTTACTGAAAAGAAGATTAATCTTGTACAAAGCATTCTACCAATCTTAGAAAACGTTGCACGGTCTGGAAGACCATTGCTCATCATAGCTGAAGACGTTGAAGGTGAAGCTCTGAGCACGCTTGTACTCAATAAGCTCCGTGGTGGCCTTCAAGTTGCTGCTGTAAAGGCGCCTGGTTTCGGTGACAGGAGAAAAGACATGCTTGGCGATATTGCTGTAATAGTAGGCGCTAAGTATGTAGTAAATGACGAGCTTGCTGTTAAGATGGAAGATATCGCTCTAAGCGATCTTGGTACTGCTAAGAGCGTA…
EHV194	Cervus elaphus	Netherlands	1	GGTATGCAGTTTGATCGCGGATATCTTTCGCCTTACTTTGTTACAAATGCTGAAAAAATGCTGGTGGAATTTGAAAATCCATACATATTCCTTACTGAAAAGAAGATTAATCTTGTACAAAGCATTCTACCAATCTTAGAAAACGTTGCACGGTCTGGAAGACCATTGCTCATCATAGCTGAAGACGTTGAAGGTGAAGCTCTGAGCACGCTTGTACTCAATAAGCTCCGTGGTGGCCTTCAAGTTGCTGCTGTAAAGGCGCCTGGTTTTGGTGACAGGAGAAAAGACATGCTTGGCGATATTGCTGTAATAGTAGGCGCTAAGTATGTAGTAAATGACGAGCTTGCTGTTAAGATGGAAGATATCGCTCTAAGCGATCTTGGTACTGCTAAGAGCGTA…
EHV20	Cervus elaphus	Netherlands	1	GGTATGCAGTTTGATCGCGGATATCTTTCGCCTTACTTTGTTACAAATGCTGAAAAAATGCTGGTGGAATTTGAAAATCCATACATATTCCTTACTGAAAAGAAGATTAATCTTGTACAAAGCATTCTACCAATCTTAGAAAACGTTGCACGGTCTGGAAGACCATTGCTCATCATAGCTGAAGACGTTGAAGGTGAAGCTCTGAGCACGCTTGTACTCAATAAGCTCCGTGGTGGCCTTCAAGTTGCTGCTGTAAAGGCGCCTGGTTTTGGTGACAGGAGAAAAGACATGCTTGGCGATATTGCTGTAATAGTAGGCGCTAAGTATGTAGTAAATGACGAGCTTGCTGTTAAGATGGAAGATATCGCTCTAAGCGATCTTGGTACTGCTAAGAGCGTA…
EHV206	Cervus elaphus	Netherlands	1	GATCGCGGATATCTTTCGCCTTACTTTGTTACAAATGCTGAAAAAATGCTGGTGGAATTTGAAAATCCATACATATTCCTTACTGAAAAGAAGATTAATCTTGTACAAAGCATTCTACCAATCTTAGAAAACGTTGCACGGTCTGGAAGACCATTGCTCATCATAGCTGAAGACGTTGAAGGTGAAGCTCTTAGCACGCTTGTACTCAATAAGCTCCGTGGTGGCCTTCAAGTTGCTGCTGTAAAGGCGCCTGGTTTTGGTGACAGGAGAAAAGACATGCTTGGCGATATTGCTGTAATAGTAGGCGCTAAGTATGTAGTAAATGACGAGCTTGCTGTTAAGATGGAAGATATCGCTCTAAGCGATCTTGGTACTGCTAAGAGCGTACGCATCACAAAA…
EHV215	Cervus elaphus	Netherlands	1	TGATCGCGGATATCTTTCGCCTTACTTTGTTACAAATGCTGAAAAAATGCTGGTGGAATTTGAAAATCCATACATATTCCTTACTGAAAAGAAGATTAATCTTGTACAAAGCATTCTACCAATCTTAGAAAACGTTGCACGGTCTGGAAGACCATTGCTCATCATAGCTGAAGACGTTGAAGGTGAAGCTCTGAGCACGCTTGTACTCAATAAGCTCCGTGGTGGCCTTCAAGTTGCTGCTGTAAAGGCGCCTGGTTTCGGTGACAGGAGAAAAGACATGCTTGGCGATATTGCTGTAATAGTAGGCGCTAAGTATGTAGTAAATGACGAGCTTGCTGTTAAGATGGAAGACATCGCTCTAAGCGATCTTGGTACTGCTAAGAGCGTACGCATCACAAA…
EHV230	Cervus elaphus	Netherlands	1	GCAGTTTGATCGCGGATATCTTTCGCCTTACTTTGTTACAAATGCTGAAAAAATGCTGGTGGAATTTGAAAATCCATACATATTCCTTACTGAAAAGAAGATTAATCTTGTACAAAGCATTCTACCAATCTTAGAAAACGTTGCACGGTCTGGAAGACCATTGCTCATCATAGCTGAAGACGTTGAAGGTGAAGCTCTGAGCACGCTTGTACTCAATAAGCTCCGTGGTGGCCTTCAAGTTGCTGCTGTAAAGGCGCCTGGTTTTGGTGACAGGAGAAAAGACATGCTTGGCGATATTGCTGTAATAGTAGGCGCTAAGTATGTAGTAAATGACGAGCTTGCTGTTAAGATGGAAGATATCGCTCTAAGCGATCTTGGTACTGCTAAGAGCGTACGCAT…
EHV234	Cervus elaphus	Netherlands	1	GGTATGCAGTTTGATCGCGGATATCTTTCGCCTTACTTTGTTACAAATGCTGAAAAAATGCTGGTGGAATTTGAAAATCCATACATATTCCTTACTGAAAAGAAGATTAATCTTGTACAAAGCATTCTACCAATCTTAGAAAACGTTGCACGGTCTGGAAGACCATTGCTCATCATAGCTGAAGACGTTGAAGGTGAAGCTCTTAGCACGCTTGTACTCAATAAGCTCCGTGGTGGCCTTCAAGTTGCTGCTGTAAAGGCGCCTGGTTTTGGTGACAGGAGAAAAGACATGCTTGGCGATATTGCTGTAATAGTAGGCGCTAAGTATGTAGTAAATGACGAGCTTGCTGTTAAGATGGAAGATATCGCTCTAAGCGATCTTGGTACTGCTAAGAGCGTA…
EHV236	Cervus elaphus	Netherlands	1	GATCGCGGATATCTTTCGCCTTACTTTGTTACAAATGCTGAAAAAATGCTGGTGGAATTTGAAAATCCATACATATTCCTTACTGAAAAGAAGATTAATCTTGTACAAAGCATTCTACCAATCTTAGAAAACGTTGCACGGTCTGGAAGACCATTGCTCATCATAGCTGAAGACGTTGAAGGTGAAGCTCTTAGCACGCTTGTACTCAATAAGCTCCGTGGTGGCCTTCAAGTTGCTGCTGTAAAGGCGCCTGGTTTTGGTGACAGGAGAAAAGACATGCTTGGCGATATTGCTGTAATAGTAGGCGCTAAGTATGTAGTAAATGACGAGCTTGCTGTTAAGATGGAAGATATCGCTCTAAGCGATCTTGGTACTGCTAAGAGCGTACGCATCACAAAA…
EHV242	Cervus elaphus	Netherlands	1	ATGGTATGCAGTTTGATCGCGGATATCTTTCGCCTTACTTTGTTACAAATGCTGAAAAAATGCTGGTGGAATTTGAAAATCCATACATATTCCTTACTGAAAAGAAGATTAATCTTGTACAAAGCATTCTACCAATCTTAGAAAACGTTGCACGGTCTGGAAGACCATTGCTCATCATAGCTGAAGACGTTGAAGGTGAAGCTCTGAGCACGCTTGTACTCAATAAGCTCCGTGGTGGCCTTCAAGTTGCTGCTGTAAAGGCGCCTGGTTTCGGTGATAGAAGAAAAGACATGCTTGGCGATATTGCTGTAATAGTAGGCGCTAAGTATGTAGTAAATGACGAGCTTGCTGTTAAGATGGAAGATATCGCTCTAAGCGATCTTGGTACTGCTAAGAGCG…
EHV277	Cervus elaphus	Netherlands	1	GATCGCGGATATCTTTCGCCTTACTTTGTTACAAATGCTGAAAAAATGCTGGTGGAATTTGAAAATCCATACATATTCCTTACTGAAAAGAAGATTAATCTTGTACAAAGCATTCTACCAATCTTAGAAAACGTTGCACGGTCTGGAAGACCATTGCTCATCATAGCTGAAGACGTTGAAGGTGAAGCTCTTAGCACGCTTGTACTCAATAAGCTCCGTGGTGGCCTTCAAGTTGCTGCTGTAAAGGCGCCTGGTTTTGGTGACAGGAGAAAAGACATGCTTGGCGATATTGCTGTAATAGTAGGCGCTAAGTATGTAGTAAATGACGAGCTTGCTGTTAAGATGGAAGATATCGCTCTAAGCGATCTTGGTACTGCTAAGAGCGTACGCATCACAAAA…
EHV291	Cervus elaphus	Netherlands	1	TGATCGCGGATATCTTTCGCCTTACTTTGTTACAAATGCTGAAAAAATGCTGGTGGAATTTGAAAATCCATACATATTCCTTACTGAAAAGAAGATTAATCTTGTACAAAGCATTCTACCAATCTTAGAAAACGTTGCACGGTCTGGAAGACCATTGCTCATCATAGCTGAAGACGTTGAAGGTGAAGCTCTGAGCACGCTTGTACTCAATAAGCTCCGTGGTGGCCTTCAAGTTGCTGCTGTAAAGGCGCCTGGTTTCGGTGACAGGAGAAAAGACATGCTTGGCGATATTGCTGTAATAGTAGGCGCTAAGTATGTAGTAAATGACGAGCTTGCTGTTAAGATGGAAGATATCGCTCTAAGCGATCTTGGTACTGCTAAGAGCGTACGCATCACAAA…
EHV297	Cervus elaphus	Netherlands	1	TGATCGCGGATATCTTTCGCCTTACTTTGTTACAAATGCTGAAAAAATGCTGGTGGAATTTGAAAATCCATACATATTCCTTACTGAAAAGAAGATTAATCTTGTACAAAGCATTCTACCAATCTTAGAAAACGTTGCACGGTCTGGAAGACCATTGCTCATCATAGCTGAAGACGTTGAAGGTGAAGCTCTTAGCACGCTTGTACTCAATAAGCTCCGTGGTGGCCTTCAAGTTGCTGCTGTAAAGGCGCCTGGTTTTGGTGACAGGAGAAAAGACATGCTTGGCGATATTGCTGTAATAGTAGGCGCTAAGTATGTAGTAAATGACGAGCTTGCTGTTAAGATGGAAGATATCGCTCTAAGCGATCTTGGTACTGCTAAGAGCGTACGCATCACAAA…
EHV300	red deer	Netherlands	1	ATGCAGTTTGATCGCGGATATCTTTCGCCTTACTTTGTTACAAATGCTGAAAAAATGCTGGTGGAATTTGAAAATCCATACATATTCCTTACTGAAAAGAAGATTAATCTTGTACAAAGCATTCTACCAATCTTAGAAAACGTTGCACGGTCTGGAAGACCATTGCTCATCATAGCTGAAGACGTTGAAGGTGAAGCTCTKAGCACGCTTGTACTCAATAAGCTCCGTGGTGGCCTTCAAGTTGCTGCTGTAAAGGCGCCTGGTTTCGGTGACAGGAGAAAAGACATGCTTGGCGATATTGCTGTAATAGTAGGCGCTAAGTATGTAGTAAATGACGAGCTTGCTGTTAAGATGGAAGACATCGCTCTAAGCGATCTTGGTACTGCTAAGAGCGTACGC…
EHV303	Cervus elaphus	Netherlands	1	GGTATGCAGTTTGATCGCGGATATCTTTCGCCTTACTTTGTTACAAATGCTGAAAAAATGCTGGTGGAATTTGAAAATCCATACATATTCCTTACTGAAAAGAAGATTAATCTTGTACAAAGCATTCTACCAATCTTAGAAAACGTTGCACGGTCTGGAAGACCATTGCTCATCATAGCTGAAGACGTTGAAGGTGAAGCTCTTAGCACGCTTGTACTCAATAAGCTCCGTGGTGGCCTTCAAGTTGCTGCTGTAAAGGCGCCTGGTTTCGGTGACAGGAGAAAAGACATGCTTGGCGATATTGCTGTAATAGTAGGCGCTAAGTATGTAGTAAATGACGAGCTTGCTGTTAAGATGGAAGACATCGCTCTAAGCGATCTTGGTACTGCTAAGAGCGTA…
EHV7	Cervus elaphus	Netherlands	1	ATGGTATGCAGTTTGATCGCGGATATCTTTCGCCTTACTTTGTTACAAATGCTGAAAAAATGCTGGTGGAATTTGAAAATCCATACATATTCCTTACTGAAAAGAAGATTAATCTTGTACAAAGCATTCTACCAATCTTAGAAAACGTTGCACGGTCTGGAAGACCATTGCTCATCATAGCTGAAGACGTTGAAGGTGAAGCTCTTAGCACGCTTGTACTCAATAAGCTCCGTGGTGGCCTTCAAGTTGCTGCTGTAAAGGCGCCTGGTTTTGGTGACAGGAGAAAAGACATGCTTGGCGATATTGCTGTAATAGTAGGCGCTAAGTATGTAGTAAATGACGAGCTTGCTGTTAAGATGGAAGATATCGCTCTAAGCGATCTTGGTACTGCTAAGAGCG…
EHV70	Cervus elaphus	Netherlands	1	TGATCGCGGATATCTTTCGCCTTACTTTGTTACAAATGCTGAAAAAATGCTGGTGGAATTTGAAAATCCATACATATTCCTTACTGAAAAGAAGATTAATCTTGTACAAAGCATTCTACCAATCTTAGAAAACGTTGCACGGTCTGGAAGACCATTGCTCATCATAGCTGAAGACGTTGAAGGTGAAGCTCTGAGCACGCTTGTACTCAATAAGCTCCGTGGTGGCCTTCAAGTTGCTGCTGTAAAGGCGCCTGGTTTTGGTGACAGGAGAAAAGACATGCTTGGCGATATTGCTGTAATAGTAGGCGCTAAGTATGTAGTAAATGACGAGCTTGCTGTTAAGATGGAAGATATCGCTCTAAGCGATCTTGGTACTGCTAAGAGCGTACGCATCACAAA…
EHV8	Cervus elaphus	Netherlands	1	GGTATGCAGTTTGATCGCGGATATCTTTCGCCTTACTTTGTTACAAATGCTGAAAAAATGCTGGTGGAATTTGAAAATCCATACATATTCCTTACTGAAAAGAAGATTAATCTTGTACAAAGCATTCTACCAATCTTAGAAAACGTTGCACGGTCTGGAAGACCATTGCTCATCATAGCTGAAGACGTTGAAGGTGAAGCTCTGAGCACGCTTGTACTCAATAAGCTCCGTGGTGGCCTTCAAGTTGCTGCTGTAAAGGCGCCTGGTTTTGGTGACAGGAGAAAAGACATGCTTGGCGATATTGCTGTAATAGTAGGCGCTAAGTATGTAGTAAATGACGAGCTTGCTGTTAAGATGGAAGATATCGCTCTAAGCGATCTTGGTACTGCTAAGAGCGTA…
EHV84	Cervus elaphus	Netherlands	1	GGTATGCAGTTTGATCGCGGATATCTTTCGCCTTACTTTGTTACAAATGCTGAAAAAATGCTGGTGGAATTTGAAAATCCATACATATTCCTTACTGAAAAGAAGATTAATCTTGTACAAAGCATTCTACCAATCTTAGAAAACGTTGCACGGTCTGGAAGACCATTGCTCATCATAGCTGAAGACGTTGAAGGTGAAGCTCTGAGCACGCTTGTACTCAATAAGCTCCGTGGTGGCCTTCAAGTTGCTGCTGTAAAGGCGCCTGGTTTTGGTGACAGGAGAAAAGACATGCTTGGCGATATTGCTGTAATAGTAGGCGCTAAGTATGTAGTAAATGACGAGCTTGCTGTTAAGATGGAAGATATCGCTCTAAGCGATCTTGGTACTGCTAAGAGCGTA…
EHV95	Cervus elaphus	Netherlands	1	ATGGTATGCAGTTTGATCGCGGATATCTTTCGCCTTACTTTGTTACAAATGCTGAAAAAATGCTGGTGGAATTTGAAAATCCATACATATTCCTTACTGAAAAGAAGATTAATCTTGTACAAAGCATTCTACCAATCTTAGAAAACGTTGCACGGTCTGGAAGACCATTGCTCATCATAGCTGAAGACGTTGAAGGTGAAGCTCTGAGCACGCTTGTACTCAATAAGCTCCGTGGTGGCCTTCAAGTTGCTGCTGTAAAGGCGCCTGGTTTTGGTGACAGGAGAAAAGACATGCTTGGCGATATTGCTGTAATAGTAGGCGCTAAGTATGTAGTAAATGACGAGCTTGCTGTTAAGATGGAAGATATCGCTCTAAGCGATCTTGGTACTGCTAAGAGCG…
EU157920	Cervus elaphus	Poland	1	TTTAGGAGGTTCAAAAATGTCAAATACGGTAGTCACGGGTGAGGTATTAGATAAGTCTATTAGGGAGGTAGTACGCATCCTAGAAGATGCAGTTGGTTGTACTGCTGGTCCTAAAGGCCTCACTGTAGCGATTAGTAAGCTTTAGGAGGTTCAAAAATGTCAAATACGGTAGTCACGGGTGAGGTATTAGATAAGTCTATTAGGGAGGTAGTACGCATCCTAGAAGATGCAGTTGGTTGTACTGCTGGTCCTAAAGGCCTCACTGTAGCGATTAGTAAGCCTTATGGGTCGCCAGAGATCACAAAGGATGGCTACAAGGTAATGAAGAGTATAAAGCCTGAAGAACCACTGGCTGCCGCTATAGCGAGCATCATTACTCAGAGTGCTTCTCAGTGTAAT…
EU157921	Cervus elaphus	Poland	1	TTTAGGAGGTTCAAAAATGTCAAATACGGTAGTCACGGGTGAGGTATTAGATAAGTCTATTAGGGAGGTAGTACGCATCCTAGAAGATGCAGTTGGTTGTACTGCTGGTCCTAAAGGCCTCACTGTAGCGATTAGTAAGCCTTATGGGTCGCCAGAGATCACAAAGGATGGCTACAAGGTAATGAAGAGTATAAAGCCTGAAGAACCACTGGCTGCCGCTATAGCGAGCATCATTACTCAGAGTGCTTCTCAGTGTAATGATAAGGTGGGAGATGGAACTACTACATGCTCCATACTAACAGCAAAAGTGATTGAAGAAGTCTCAAAAGCGAAAGCTGCTGGATCTGATATTGTTAGCATAAAGAATGGTATTCTCAAGGCTAAGGAAGCGGTTCTCAC…
EU839853	Equus caballus	Czech Republic	1	TATCTTTCGCCTTACTTTGTTACAAATGCTGAAAAAATGCTGGTGGAATTTGAAAATCCATACATATTTCTTACTGAAAAGAAGATTAATCTTGTACAAAGCATTCTACCAATCTTAGAAAACGTTGCACGGTCTGGAAGACCATTGCTCATCATAGCTGAAGACGTTGAAGGTGAAGCTCTGAGCACGCTTGTACTCAATAAGCTCCGTGGTGGCCTTCAAGTTGCTGCTGTAAAGGCGCCTGGTTTCGGTGACAGGAGAAAAGACATGCTTGGCGATATTGCTGTAATAGTAGGCGCTAAGTATGTAGTAAATGACGAGCTTGCTGTTAAGATGGAAGACATCGCTCTAAGCGATCTTGGTACTGCTAAGAGCGTACGCATCACAAAAGACGCAACT…
EU839858	Equus caballus	Czech Republic	1	TATCTTTCGCCTTACTTTGTTACAAATGCTGAAAAAATGCTGGTGGAATTTGAAAATCCATACATATTCCTTACTGAAAAGAAGATTAATCTTGTACAAAGCATTCTACCAATCTTAGAAAACGTTGCACGGTCTGGAAGACCATTGCTCATCATAGCTGAAGACGTTGAAGGTGAAGCTCTGAGCACGCTTGTACTCAATAAGCTCCGTGGTGGCCTTCAAGTTGCTGCTGTAAAGGCGCCTGGTTTCGGTGACAGAAGAAAAGACATGCTTGGCGATATTGCTGTAATAGTAGGCGCTAAGTATGTAGTAAATGACGAGCTTGCTGTTAAGATGGAAGACATCGCTCTAAGCGATCTTGGTACTGCTAAGAGCGTGCGAATCACAAAAGACGCAACT…
EU860087	Bos taurus	France	1	TACGCATCCTAGAAGATGCAGTTGGTTGTACTGCTGGTCCTAAAGGCCTCACTGTAGCGATTAGTAAGCCTTATGGGTCGCCAGAGATCACAAAGGATGGCTACAAGGTAATGAAGAGTATAAAGCCTGAAGAACCACTGGCTGCCGCTATAGCGAGCATCATTACTCAGAGTGCTTCTCAGTGTAATGATAAGGTGGGAGATGGAACTACTACATGCTCCATACTAACAGCAAAAGTGATTGAAGAAGTCTCAAAAGCGAAAGCTGCTGGATCTGATATTGTTAGCATAAAGAATGGTATTCTCAAGGCTAAGGAAGCGGTTCTCACAGCGCTTATGTCTATGAGACGTGAAGTAGAAGAAGACGAAATTGCACAAGTTGCAACATTGTCTGCAAATG…
EU860088	Ovis aries	France	1	ATGAGACGTGAAGTAGAAGAAGACGAAATTGCACAAGTTGCAACATTGTCTGCAAATGGAGACAAGAACATAGGAAGTAAGATTGCACAGTGTGTTAAAGAAGTCGGTAAAGACGGTGTTATAACTGTTGAAGAAAGCAAAGGCTTCAAGGATCTAGAAGTTGAAAAGACTGATGGTATGCAGTTTGATCGCGGATATCTTTCGCCTTACTTTGTTACAAATGCTGAAAAAATGCTGGTGGAATTTGAAAATCCATACATATTCCTTACTGAAAAGAAGATTAATCTTGTACAAAGCATTCTACCAATCTTAGAAAACGTTGCACGGTCTGGAAGACCATTGCTCATCATAGCTGAAGACGTTGAAGGTGAAGCTCTTAGCACGCTTGTACTCAATAAG…
EU860089	Ovis aries	France	1	AGGAAGCATAGTCTTATGCTACGGTTGTTTGTTCTATTGGTCTAAAGTTTAGGAGGTTCAAAAATGTCAAATACGGTAGTCACGGGTGAGGTATTAGATAAGTCTATTAGGGAGGTAGTACGCATCCTAGAAGATGCAGTTGGTTGTACTGCTGGTCCTAAAGGCCTCACTGTAGCGATTAGTAAGCCTTATGGGTCGCCAGAGATCACAAAGGATGGCTACAAGGTAATGAAGAGTATAAAGCCTGAAGAACCACTGGCTGCCGCTATAGCGAGCATCATTACTCAGAGTGCTTCTCAGTGTAATGATAAGGTGGGAGATGGAACTACTACATGCTCCATACTAACAGCAAAAGTGATTGAAGAAGTCTCAAAAGCGAAAGCTGCTGGATCTGATATT…
EU860090	goat/sheep	France	1	ATGTCAAATACGGTAGTCACGGGTGAGGTATTAGATAAGTCTATTAGGGAGGTAGTACGCATCCTAGAAGATGCAGTTGGTTGTACTGCTGGTCCTAAAGGCCTCACTGTAGCGATTAGTAAGCCTTATGGGTCGCCAGAGATCACAAAGGATGGCTACAAGGTAATGAAGAGTATAAAGCCTGAAGAACCACTGGCTGCCGCTATAGCGAGCATCATTACTCAGAGTGCTTCTCAGTGTAATGATAAGGTGGGAGATGGAACTACTACATGCTCCATACTAACGGCAAAAGTGATTGAAGAAGTCTCAAAAGCGAAAGCTGCTGGATCTGATATTGTTAGCATAAAGAATGGTATTCTCAAGGCTAAGGAAGCGGTTCTTACAGCGCTTATGTCTATG…
EU860091	Bos taurus	France	1	AAGTCTCAAAAGCGAAAGCTGCTGGATCTGATATTGTTAGCATAAAGAATGGTATTCTCAAGGCTAAGGAAGCGGTTCTTACAGCGCTTATGTCTATGAGACGTGAAGTAGAAGAAGACGAAATTGCACAAGTTGCAACATTGTCTGCAAATGGAGACAAGAACATAGGAAGTAAGATTGCACAGTGTGTTAAAGAAGTCGGTAAAGACGGTGTTATAACTGTTGAAGAAAGCAAAGGCTTCAAGGATCTAGAAGTTGAAAAGACTGATGGTATGCAGTTTGATCGCGGATATCTTTCGCCTTACTTTGTTACAAATGCTGAAAAAATGCTGGTGGAATTTGAAAATCCATACATATTCCTTACTGAAAAGAAGATTAATCTTGTACAAAGCATTCTAC…
EU982549	Canis familiaris	Italy	1	AGGCTGATGGTATGCAGTTTGATCGCGGATATCTTTCGCCTTACTTTGTTACAAATGCTGAAAAAATGCTGGTGGAATTTGAAAATCCATACATATTTCTTACTGAAAAGAAGATTAATCTTGTACAAAGCATTCTACCAATCTTAGAAAACGTTGCACGGTCTGGAAGACCATTGCTCATCATAGCTGAAGACGTTGAAGGTGAAGCTCTGAGCACGCTTGTACTCAATAAGCTCCGTGGTGGCCTTCAAGTTGCTGCTGTAAAGGCGCCTGGTTTCGGTGACAGGAGAAAAGACATGCTTGGCGATATTGCTGTAATAGTAGGCGCTAAGTATGTAGTAAATGACGAGCTTGCTGTTAAGATGGAAGACATCGCTCTAAGCGATCTTGGTACTGCTA…
Foxspleen-2010-1095	Vulpes vulpes	Netherlands	1	TGATGGTATGCAGTTTGATCGCGGATATCTTTCGCCTTACTTTGTTACAAATGCTGAAAAAATGCTGGTGGAATTTGAAAATCCATACATATTTCTTACTGAAAAGAAGATTAATCTTGTACAAAGCATTCTACCAATCTTAGAAAACGTTGCACGGTCTGGAAGACCATTGCTCATCATAGCTGAAGACGTTGAAGGTGAAGCTCTGAGCACGCTTGTACTCAATAAGCTCCGTGGTGGCCTTCAAGTTGCTGCTGTAAAGGCGCCTGGTTTCGGTGACAGGAGAAAAGACATGCTTGGCGATATTGCTGTAATAGTAGGCGCTAAGTATGTAGTAAATGACGAGCTTGCTGTTAAGATGGAAGACATCGCTCTAAGCGATCTTGGTACTGCTAAGAG…
Foxspleen-2010-1096	Vulpes vulpes	Netherlands	1	TGATCGCGGATATCTTTCGCCTTACTTTGTTACAAATGCTGAAAAAATGCTGGTGGAATTTGAAAATCCATACATATTTCTTACTGAAAAGAAGATTAATCTTGTACAAAGCATTCTACCAATCTTAGAAAACGTTGCACGGTCTGGAAGACCATTGCTCATCATAGCTGAAGACGTTGAAGGTGAAGCTCTGAGCACGCTTGTACTCAATAAGCTCCGTGGTGGCCTTCAAGTTGCTGCTGTAAAGGCGCCTGGTTTCGGTGACAGGAGAAAAGACATGCTTGGCGATATTGCTGTAATAGTAGGCGCTAAGTATGTAGTAAATGACGAGCTTGCTGTTAAGATGGAAGACATCGCTCTAAGCGATCTTGGTACTGCTAAGAGCGTACGCATCACAAA…
Foxspleen-2010-1147	Vulpes vulpes	Netherlands	1	TGATCGCGGATATCTTTCGCCTTACTTTGTTACAAATGCTGAAAAAATGCTGGTGGAATTTGAAAATCCATACATATTCCTTACTGAAAAGAAGATTAATCTTGTACAAAGCATTCTACCAATCTTAGAAAACGTTGCACGGTCTGGAAGACCATTGCTCATCATAGCTGAAGACGTTGAAGGTGAAGCTCTGAGCACGCTTGTACTCAATAAGCTCCGTGGTGGCCTTCAAGTTGCTGCTGTAAAGGCGCCTGGTTTCGGTGACAGGAGAAAAGACATGCTTGGCGATATTGCTGTAATAGTAGGCGCTAAGTATGTAGTAAATGACGAGCTTGCTGTTAAGATGGAAGACATCGCTCTAAGCGATCTTGGTACTGCTAAGAGCGTACGCATCACAAA…
GQ452225	Capra aegagrus	Switzerland	2	GGATATCTTTCGCCTTACTTTGTTACAAATGCTGAAAAAATGCTGGTGGAATTTGAAAATCCATACATATTCCTTACTGAAAAGAAGATTAATCTTGTACAAAGCATTCTACCAATATTAGAAAACGTTGCGAGAGCTGGTAGACCATTGCTTATCATAGCTGAAGATGTTGAAGGTGAAGCTCTGAGCACGCTTGTACTCAATAAGCTCCGTGGTGGGCTTCAAGTTGCTGCTGTAAAGGCGCCTGGTTTCGGTGACAGAAGAAAAGACATGCTAGGCGATATTGCCGTAATAGTAGGCGCTAAGTATGTAGTAAATGACGAGCTTGCTGTTAAGATGGAAGATATCGCTCTAAGCGATCTTGGTACTGCTAAGAGCGTGCGCATCACAAAAGACGCA…
GQ452227	Capra aegagrus	Switzerland	1	GGATATCTTTCGCCTTACTTTGTTACAAATGCTGAAAAAATGCTGGTGGAATTTGAAAATCCATACATATTCCTTACTGAAAAGAAGATTAATCTTGTACAAAGCATTCTACCAATCTTAGAAAACGTTGCACGGTCTGGAAGACCATTGCTCATCATAGCTGAAGACGTTGAAGGTGAAGCTCTGAGCACGCTTGTACTCAATAAGCTCCGTGGTGGCCTTCAAGTTGCTGCTGTAAAGGCGCCTGGTTTCGGTGACAGGAGAAAAGACATGCTTGGCGATATTGCTGTAATAGTAGGCGCTAAGTATGTAGTAAATGACGAGCTTGCTGTTAAGATGGAAGACATCGCTCTAAGCGATCTTGGTACTGCTAAGAGCGTACGCATCACAAAAGACGCA…
GQ452229	Capra aegagrus	Switzerland	2	GGATATCTTTCGCCTTACTTTGTTACAAATGCTGAAAAAATGCTGGTGGAATTTGAAAATCCATACATATTCCTTACTGAAAAGAAGATTAATCTTGTACAAAGCATTTTACCAATATTAGAAAACGTTGCGAGAGCTGGTAGACCATTGCTTATCATAGCTGAAGATGTTGAAGGTGAAGCTCTGAGCACGCTTGTACTCAATAAGCTCCGTGGTGGGCTTCAAGTTGCTGCTGTAAAGGCGCCTGGTTTCGGTGACAGAAGAAAAGACATGCTAGGCGATATTGCCGTAATAGTAGGCGCTAAGTATGTAGTAAATGACGAGCTTGCTGTTAAGATGGAAGATATCGCTCTAAGCGATCTTGGTACTGCTAAGAGCGTGCGCATCACAAAAGACGCA…
GQ452231	Capra aegagrus	Germany	1	GGATATCTTTCGCCTTACTTTGTTACAAATGCTGAAAAAATGCTGGTGGAATTTGAAAATCCATACATATTCCTTACTGAAAAGAAGATTAATCTTGTACAAAGCATTCTACCAATCTTAGAAAACGTTGCACGGTCTGGAAGACCATTGCTCATCATAGCTGAAGACGTTGAAGGTGAAGCTCTGAGCACGCTTGTACTCAATAAGCTCCGTGGTGGCCTTCAAGTTGCTGCTGTAAAGGCGCCTGGTTTCGGTGACAGGAGAAAAGACATGCTTGGCGATATTGCTGTAATAGTAGGCGCTAAGTATGTAGTAAATGACGAGCTTGCTGTTAAGATGGAAGACATCGCTCTAAGCGATCTTGGTACTGCTAAGAGCGTACGCATCACAAAAGACGCA…
GQ988754	Capreolus capreolus	Austria	2	GGATATCTTTCGCCTTACTTTGTTACAAATGCTGAAAAAATGCTGGTGGAATTTGAAAATCCATACATATTCCTTACTGAAAAGAAGATTAATCTTGTACAAAGCATTTTACCAATATTAGAAAACGTTGCGAGAGCTGGTAGACCATTGCTTATCATAGCTGAAGATGTTGAAGGTGAAGCTCTGAGCACGCTTGTACTCAATAAGCTCCGTGGTGGGCTTCAAGTTGCTGCTGTAAAGGCGCCTGGTTTCGGTGACAGAAGAAAAGACATGCTAGGCGATATTGCCGTAATAGTAGGCGCTAAGTATGTAGTAAATGACGAGCTTGCTGTTAAGATGGAAGATATCGCTCTAAGCGATCTTGGTACTGCTAAGAGCGTGCGCATCACAAAAGACGCA…
GQ988755	Ovis musimon	Austria	1	GGATATCTTTCGCCTTACTTTGTTACAAATGCTGAAAAAATGCTGGTGGAATTTGAAAATCCATACATATTCCTTACTGAAAAGAAGATTAATCTTGTACAAAGCATTCTACCAATCTTAGAAAACGTTGCACGGTCTGGAAGACCATTGCTCATCATAGCTGAAGACGTTGAAGGTGAAGCTCTTAGCACGCTTGTACTCAATAAGCTCCGTGGTGGCCTTCAAGTTGCTGCTGTAAAGGCGCCTGGTTTTGGTGACAGGAGAAAAGACATGCTTGGCGATATTGCTGTAATAGTAGGCGCTAAGTATGTAGTAAATGACGAGCTTGCTGTTAAGATGGAAGATATCGCTCTAAGCGATCTTGGTACTGCTAAGAGCGTACGCATCACAAAAGACGCA…
GQ988756	Rupicapra rupicapra	Austria	1	GGATATCTTTCGCCTTACTTTGTTACAAATGCTGAAAAAATGCTGGTGGAATTTGAAAATCCATACATATTCCTTACTGAAAAGAAGATTAATCTTGTACAAAGCATTCTACCAATCTTAGAAAACGTTGCACGGTCTGGAAGACCATTGCTCATCATAGCTGAAGACGTTGAAGGTGAAGCTCTGAGCACGCTTGTACTCAATAAGCTCCGTGGTGGCCTTCAAGTTGCTGCTGTAAAGGCGCCTGGTTTCGGTGACAGGAGAAAAGACATGCTTGGCGATATTGCTGTAATAGTAGGCGCTAAGTATGTAGTAAATGACGAGCTTGCTGTTAAGATGGAAGATATCGCTCTAAGCGATCTTGGTACTGCTAAGAGCGTACGCATCACAAAAGACGCA…
GQ988757	Cervus elaphus	Austria	1	GGATATCTTTCGCCTTACTTTGTTACAAATGCTGAAAAAATGCTGGTGGAATTTGAAAATCCATACATATTCCTTACTGAAAAGAAGATTAATCTTGTACAAAGCATTCTACCAATCTTAGAAAACGTTGCACGGTCTGGAAGACCATTGCTCATCATAGCTGAAGACGTTGAAGGTGAAGCTCTTAGCACGCTTGTACTCAATAAGCTCCGTGGTGGCCTTCAAGTTGCTGCTGTAAAGGCGCCTGGTTTTGGTGACAGGAGAAAAGACATGCTTGGCGATATTGCTGTAATAGTAGGCGCTAAGTATGTAGTAAATGACGAGCTTGCTGTTAAGATGGAAGATATCGCTCTAAGCGATCTTGGTACTGCTAAGAGCGTACGCATCACAAAAGACGCA…
GQ988758	Cervus elaphus	Austria	1	GGATATCTTTCGCCTTACTTTGTTACAAATGCTGAAAAAATGCTGGTGGAATTTGAAAATCCATACATATTCCTTACTGAAAAGAAGATTAATCTTGTACAAAGCATTCTACCAATCTTAGAAAACGTTGCACGGTCTGGAAGACCATTGCTCATCATAGCTGAAGACGTTGAAGGTGAAGCTCTGAGCACGCTTGTACTCAATAAGCTCCGTGGTGGCCTTCAAGTTGCTGCTGTAAAGGCGCCTGGTTTCGGTGACAGGAGAAAAGACATGCTTGGCGATATTGCTGTAATAGTAGGCGCTAAGTATGTAGTAAATGACGAGCTTGCTGTTAAGATGGAAGACATCGCTCTAAGCGATCTTGGTACTGCTAAGAGCGTGCGCATCACAAAAGACGCA…
GQ988759	Ovis musimon	Austria	1	GGATATCTTTCGCCTTACTTTGTTACAAATGCTGAAAAAATGCTGGTGGAATTTGAAAATCCATACATATTCCTTACTGAAAAGAAGATTAATCTTGTACAAAGCATTCTACCAATCTTAGAAAACGTTGCACGGTCTGGAAGACCATTGCTCATCATAGCTGAAGACGTTGAAGGTGAAGCTCTTAGCACGCTTGTACTCAATAAGCTCCGTGGTGGCCTTCAAGTTGCTGCTGTAAAGGCGCCTGGTTTTGGTGACAGGAGAAAAGACATGCTTGGCGATATTGCTGTAATAGTAGGCGCTAAGTATGTAGTAAATGACGAGCTTGCTGTTAAGATGGAAGATATCGCTCTAAGCGATCTTGGTACTGCTAAGAGCGTACGCATCACAAAAGACGCA…
GQ988760	Capreolus capreolus	Austria	2	GGATATCTTTCGCCTTACTTTGTTACAAATGCTGAAAAAATGCTGGTGGAATTTGAAAATCCATACATATTCCTTACTGAAAAGAAGATTAATCTTGTACAAAGCATTCTACCAATATTAGAAAACGTTGCGAGAGCTGGTAGACCATTGCTTATCATAGCTGAAGATGTTGAAGGTGAAGCTCTGAGCACGCTTGTACTCAATAAGCTCCGTGGTGGGCTTCAAGTTGCTGCTGTAAAGGCGCCTGGTTTCGGTGACAGAAGAAAAGACATGCTAGGCGATATTGCCGTAATAGTAGGCGCTAAGTATGTAGTAAATGACGAGCTTGCTGTTAAGATGGAAGATATCGCTCTAAGCGATCTTGGTACTGCTAAGAGCGTGCGCATCACAAAAGACGCA…
GQ988762	Capreolus capreolus	Austria	2	GGATATCTTTCGCCTTACTTTGTTACAAATGCTGAAAAAATGCTGGTGGAATTTGAAAATCCATACATATTCCTTACTGAAAAGAAGATTAATCTTGTACAAAGCATTTTACCAATATTAGAAAACGTTGCGAGAGCTGGTAGACCATTGCTTATCATAGCTGAAGATGTTGAAGGTGAAGCTCTGAGCACGCTTGTACTCAATAAGCTCCGTGGTGGGCTTCAAGTTGCTGCTGTAAAGGCGCCTGGTTTCGGTGACAGAAGAAAAGACATGCTAGGCGATATTGCCGTAATAGTAGGCGCTAAGTATGTAGTAAATGACGAGCTTGCTGTTAAGATGGAAGATATCGCTCTAAGCGATCTTGGTACTGCTAAGAGCGTGCGCATCACAAAAGACGCA…
GQ988768	Rupicapra rupicapra	Austria	1	GGATATCTTTCGCCTTACTTTGTTACAAATGCTGAAAAAATGCTGGTGGAATTTGAAAATCCATACATATTCCTTACTGAAAAGAAGATTAATCTTGTACAAAGCATTCTACCAATCTTAGAAAACGTTGCACGGTCTGGAAGACCATTGCTCATCATAGCTGAAGACGTTGAAGGTGAAGCTCTGAGCACGCTTGTACTCAATAAGCTCCGTGGTGGCCTTCAAGTTGCTGCTGTAAAGGCGCCTGGTTTCGGTGACAGAAGAAAAGACATGCTTGGCGATATTGCTGTAATAGTAGGCGCTAAGTATGTAGTAAATGACGAGCTTGCTGTTAAGATGGAAGATATCGCTCTAAGCGATCTTGGTACTGCTAAGAGCGTACGCATCACAAAAGACGCA…
GQ988769	Rupicapra rupicapra	Austria	1	GGATATCTTTCGCCTTACTTTGTTACAAATGCTGAAAAAATGCTGGTGGAATTTGAAAATCCATACATATTCCTTACTGAAAAGAAGATTAATCTTGTACAAAGCATTCTACCAATCTTAGAAAACGTTGCACGGTCTGGAAGACCATTGCTCATCATAGCTGAAGACGTTGAAGGTGAAGCTCTTAGCACGCTTGTACTCAATAAGCTCCGTGGTGGCCTTCAAGTTGCTGCTGTAAAGGCGCCTGGTTTTGGTGACAGGAGAAAAGACATGCTTGGCGATATTGCTGTAATAGTAGGCGCTAAGTATGTAGTAAATGACGAGCTTGCTGTTAAGATGGAAGACATCGCTCTAAGCGATCTTGGTACTGCTAAGAGCGTACGCATCACAAAAGACGCA…
GQ988771	Cervus elaphus	Austria	1	GGATATCTTTCGCCTTACTTTGTTACAAATGCTGAAAAAATGCTGGTGGAATTTGAAAATCCATACATATTCCTTACTGAAAAGAAGATTAATCTTGTACAAAGCATTCTACCAATCTTAGAAAACGTTGCACGGTCTGGAAGACCATTGCTCATCATAGCTGAAGACGTTGAAGGTGAAGCTCTGAGCACGCTTGTACTCAATAAGCTCCGTGGTGGCCTTCAAGTTGCTGCTGTAAAGGCGCCTGGTTTTGGTGACAGGAGAAAAGACATGCTTGGCGATATTGCTGTAATAGTAGGCGCTAAGTATGTAGTAAATGACGAGCTTGCTGTTAAGATGGAAGATATCGCTCTAAGCGATCTTGGTACTGCTAAGAGCGTACGCATCACAAAAGACGCA…
GQ988772	Capra ibex	Austria	1	GGATATCTTTCGCCTTACTTTGTTACAAGTGCTGAAAAAATGCTGGTGGAATTTGAAAATCCATACATATTCCTTACTGAAAAGAAGATTAATCTTGTACAAAGCATTCTACCAATCTTAGAAAACGTTGCACGGTCTGGAAGACCATTGCTCATCATAGCTGAAGACGTTGAAGGTGAAGCTCTTAGCACGCTTGTACTCAATAAGCTCCGTGGTGGCCTTCAAGTTGCTGCTGTAAAGGCGCCTGGTTTTGGTGACAGGAGAAAAGACATGCTTGGCGATATTGCTGTAATAGTAGGCGCTAAGTATGTAGTAAATGACGAGCTTGCTGTTAAGATGGAAGATATCGCTCTAAGCGATCTTGGTACTGCTAAGAGCGTACGCATCACAAAAGACGCA…
GQ988774	Rupicapra rupicapra	Austria	1	GGATATCTTTCGCCTTACTTTGTTACAAATGCTGAAAAAATGCTGGTGGAATTTGAAAATCCATACATATTCCTTACTGAAAAGAAGATTAATCTTGTACAAAGCATTCTACCAATCTTAGAAAACGTTGCACGGTCTGGAAGACCATTGCTCATCATAGCTGAAGACGTTGAAGGTGAAGCTCTTAGCACGCTTGTACTCAATAAGCTCCGTGGTGGCCTTCAAGTTGCTGCTGTAAAGGCGCCTGGTTTTGGTGACAGGAGAAAAGACATGCTTGGCGATATTGCTGTAATAGTAGGCGCTAAGTATGTAGTAAATGACGAGCTTGCTGTTAAGATGGAAGATATCGCTCTAAGCGATCTTGGTACTGCTAAGAGCGTACGCATCACAAAAGACGCA…
HedghogIhexagonus43	Hedgehog	Netherlands	1	ATTCCTTACTGAAAAGAAGATTAATCTTGTACAAAGCATTCTACCAATCTTAGAAAACGTTGCACGGTCTGGAAGACCATTGCTCATCATAGCTGAAGACGTTGAAGGTGAAGCTCTGAGCACGCTTGTACTCAATAAGCTCCGTGGTGGCCTTCAAGTTGCTGCTGTAAAGGCGCCTGGTTTCGGTGACAGGAGAAAAGACATGCTTGGCGATATTGCTGTAATAGTAGGCGCTAAGTATGTAGTAAATGACGAGCTTGCTGTTAAGATGGAAGACATCGCTCTAAGCGATCTTGGTACTGCTAAGAGCGTACGCATCACAAAAGACGCAACTACTATCATAGGTAGTGTTGATAGCAGTTCTGAAAGCATAGCTAGCAGGACTAATCAAATCAAAGC…
HedghogIhexagonus72	Hedgehog	Netherlands	1	GCGGATATCTTTCGCCTTACTTTGTTACAAATGCTGAAAAAATGCTGGTGGAATTTGAAAATCCATACATATTCCTTACTGAAAAGAAGATTAATCTTGTACAAAGCATTCTACCAATCTTAGAAAACGTTGCACGGTCTGGAAGACCATTGCTCATCATAGCTGAAGACGTTGAAGGTGAAGCTCTGAGCACGCTTGTACTCAATAAGCTCCGTGGTGGCCTTCAAGTTGCTGCTGTAAAGGCGCCTGGTTTCGGTGACAGGAGAAAAGACATGCTTGGCGATATTGCTGTAATAGTAGGCGCTAAGTATGTAGTAAATGACGAGCTTGCTGTTAAGATGGAAGACATCGCTCTAAGCGATCTTGGTACTGCTAAGAGCGTACGCATCACAAAAGACG…
HM057223	Cervus elaphus	Spain	1	TTATGCTACGGTTGTTTGTTCTATTGGTCTAAAGTTTAGGAGGTTCAAAAATGTCAAATACGGTAGTCACGGGTGAGGTATTAGATAAGTCTATTAGGGAGGTAGTACGCATCCTAGAAGATGCAGTTGGTTGTACTGCTGGTCCTAAAGGCCTCACTGTAGCGATTAGTAAGCCTTATGGGTCGCCAGAGATCACAAAGGATGGCTACAAGGTAATGAAGAGTATAAAGCCTGAAGAACCACTGGCTGCCGCTATAGCGAGCATCATTACTCAGAGTGCTTCTCAGTGTAATGATAAGGTGGGAGATGGAACTACTACATGCTCCATACTAACAGCAAAAGTGATTGAAGAAGTCTCAAAAGCGAAAGCTGCTGGATCTGATATTGTTAGCATAAAGA…
HM057224	Cervus elaphus	Spain	1	TTATGCTACGGTTGTTTGTTCTATTGGTCTAAAGTTTAGGAGGTTCAAAAATGTCAAATACGGTAGTCACGGGTGAGGTATTAGATAAGTCTATTAGGGAAGTAGTACGCATCCTAGAAGATGCAGTTGGTTGTACTGCTGGTCCTAAAGGCCTCACTGTAGCGATTAGTAAGCCTTATGGGTCGCCAGAGATCACAAAGGATGGCTACAAGGTAATGAAGAGTATAAAGCCTGAAGAACCACTGGCTGCCGCTATAGCGAGCATCATTACTCAGAGTGCTTCTCAGTGTAATGATAAGGTGGGAGATGGAACTACTACATGCTCCATACTAACAGCAAAAGTGATTGAAGAAGTCTCAAAAGCGAAAGCTGCTGGATCTGATATTGTTAGCATAAAGA…
HM057225	Cervus elaphus	Spain	1	TTATGCTACGGTTGTTTGTTCTATTGGTCTAAAGTTTAGGAGGTTCAAAAATGTCAAATACGGTAGTCACGGGTGAGGTATTAGATAAGTCTATTAGGGAGGTAGTACGCATCCTAGAAGATGCAGTTGGTTGTACTGCTGGTCCTAAAGGCCTCACTGTAGCGATTAGTAAGCCTTATGGGTCGCCAGAGATCACAAAGGATGGCTACAAGGTAATGAAGAGTATAAAGCCTGAAGAACCACTGGCTGCCGCTATAGCGAGCATCATTACTCAGAGTGCTTCTCAGTGTAATGATAAGGTGGGAGATGGAACTACTACATGCTCCATACTAACAGCAAAAGTGATTGAAGAAGTCTCAAAAGCGAAAGCTGCTGGATCTGATATTGTTAGCATAAAGA…
HM057227	red deer	Spain	1	TTATGCTACGGTTGTTTGTTCTATTGGTCTAAAGTTTAGGAGGTTCAAAAATGTCAAATACGGTAGTCACGGGTGAGGTATTAGATAAGTCTATTAGGGAGGTAGTACGCATCCTAGAAGATGCAGTTGGTTGTACTGCTGGTCCTAAAGGCCTCACTGTAGCGATTAGTAAGCCTTATGGGTCGCCAGAGATCACAAAGGATGGCTACAAGGTAATGAAGAGTATAAAGCCTGAAGAACCACTGGCTGCCGCTATAGCGAGCATCATTACTCAGAGTGCTTCTCAGTGTAATGATAAGGTGGGAGATGGAACTACTACATGCTCCATACTAACAGCAAAAGTGATTGAAGAAGTCTCAAAAGCGAAAGCTGCTGGATCTGATATTGTTAGCATAAAGA…
HorseNL12	Equus caballus	Netherlands	1	GGATATCTTTCGCCTTACTTTGTTACAAATGCTGAAAAAATGCTGGTGGAATTTGAAAATCCATACATATTCCTTACTGAAAAGAAGATTAATCTTGTACAAAGCATTCTACCAATCTTAGAAAACGTTGCACGGTCTGGAAGACCATTGCTCATCATAGCTGAAGACGTTGAAGGTGAAGCTCTGAGCACACTTGTACTCAATAAGCTCCGTGGTGGCCTTCAAGTTGCTGCTGTAAAGGCGCCTGGTTTTGGTGACAGGAGAAAAGACATGCTTGGCGATATTGCTGTAATAGTAGGCGCTAAGTATGTAGTAAATGACGAGCTTGCTGTTAAGATGGAAGACATCGCTCTAAGCGATCTTGGTACTGCTAAGAGCGTACGCATCACAAAAGACGCA…
HQ630615	Myodes rufocanus	Russia	3	TAGTCTTATGCTCCGGTTGTTTGTTCTATTGGTCTAAAGTTTAGGAGGTTCAAAAATGTCAAATACGGTAGTCACGGGTGAGGTGTTAGATAAGTCTATTAGGGAAGTAGTACGCATCCTCGAAGATGCAGTTGGTTGTACTGCTGGTCCTAAAGGCCTCACTGTAGCGATTAGTAAGCCTTATGGGTCGCCAGAGATCACAAAGGATGGCTACAAGGTAATGAAGAGTATAAAGCCTGAAGAGCCACTGGCTGCCGCTATAGCGAGCATCATTACTCAGAGTGCTTCTCAGTGTAATGATAAGGTGGGAGATGGCACTACTACATGCTCCATACTGACAGCTAAGGTGATCGAGGAAGTCTCAAAGGCAAAAGCTGCGGGATCCGATATTGTTAGCAT…
HQ630617	Sorex araneus	Russia	3	AGCATAGTCTTATGCTCCAGTTGTTTGTTCTATTGGTCTAAAGTTTAGGAGGTTCAAAAATGTCAAATACGGTAGTCACGGGTGAGGTGTTAGATAAGTCTATTAGGGAAGTAGTACGCATCCTCGAAGATGCAGTTGGTTGTACTGCTGGTCCTAAAGGCCTCACTGTAGCGATTAGTAAGCCTTATGGGTCGCCAGAGATCACAAAGGATGGCTACAAGGTAATGAAGAGTATAAAGCCTGAAGAACCACTGGCTGCCGCTATAGCGAGCATCATTACTCAGAGTGCTTCTCAGTGTAATGATAAGGTGGGAGATGGAACTACTACATGCTCCATACTGACAGCTAAGGTAATCGAGGAAGTCTCAAAAGCAAAAGCTGCGGGATCTGATATTGTTA…
HQ630618	Tamias sibiricus	Russia	2	TAGTCTTATGCTACAGTTGTTTGTTCTATTGGTCTAAAGTTTAGGAGGTTCAAAAATGTCAAATACGGTAGTCACGGGTGAGGTATTAGATAAGTCTATTAGGGAGGTAGTACGCATCCTAGAAGATGCAGTTGGTTGTACTGCTGGTCCTAAAGGCCTCACTGTAGCGATTAGTAAGCCTTATGGGTCACCAGAGATCACAAAGGATGGCTACAAGGTAATGAAGAGTATAAAGCCTGAAGAACCACTGGCTGCCGCTATAGCGAGCATCATTACTCAGAGTGCTTCTCAGTGTAATGATAAGGTGGGAGATGGAACTACTACATGCTCCATACTGACAGCAAAAGTGATTGAAGAAGTCTCAAAAGCGAAAGCTGCTGGATCTGATATTGTTAGCAT…
HQ630619	Tamias sibiricus	Russia	2	TAGTCTTATGCTACGGTTGTTTGTTCTATTGGTCTAAAGTTTAGGAGGTTCAAAAATGTCAAATACGGTAGTCACGGGTGAGGTATTAGATAAGTCTATTAGGGAGGTAGTACGCATCCTAGAAGATGCAGTTGGTTGTACTGCTGGTCCTAAAGGCCTCACTGTAGCGATTAGTAAGCCTTATGGGTCACCAGAGATCACAAAGGATGGCTACAAGGTAATGAAGAGTATAAAGCCTGAAGAACCACTGGCTGCCGCTATAGCGAGCATCATTACTCAGAGTGCTTCTCAGTGTAATGATAAGGTGGGAGATGGAACTACTACATGCTCCATACTGACAGCAAAAGTGATTGAAGAAGTCTCAAAAGCGAAAGCTGCTGGATCTGATATTGTTAGCAT…
hung1on7dot2	Erinaceus roumanicus	Hungary	1	CTTTGTTACAAATGCTGAAAAAATGCTGGTGGAATTTGAAAATCCATACATATTCCTTACTGAAAAGAAGATTAATCTTGTACAAAGCATTCTACCAATCTTAGAAAACGTTGCACGGTCTGGAAGACCATTGCTCATCATAGCTGAAGACGTTGAAGGTGAAGCTCTGAGCACGCTTGTACTCAATAAGCTCCGTGGTGGCCTTCAAGTTGCTGCTGTAAAGGCGCCTGGTTTCGGTGACAGGAGAAAAGACATGCTTGGCGATATTGCTGTAATAGTAGGCGCTAAGTATGTAGTAAATGACGAGCTTGCTGTTAAGATGGAAGACATCGCTCTAAGCGATCTTGGTACTGCTAAGAGCGTACGCATCACAAAAGACGCAACTACTATCATAGGTAG…
hungL119	Erinaceus roumanicus	Hungary	1	GGATATCTTTCGCCTTACTTTGTTACAAATGCTGAAAAAATGCTGGTGGAATTTGAAAATCCATACATATTCCTTACTGAAAAGAAGATTAATTTTGTACAAAGCATTCTACCAATCTTAGAAAACGTTGCACGGTCTGGAAGACCATTGCTCATCATAGCTGAAGACGTTGAAGGTGAAGCTCTGAGCACGCTTGTACTCAATAAGCTCCGTGGTGGCCTTCAAGTTGCTGCTGTAAAGGCGCCTGGTTTCGGTGACAGGAGAAAAGACATGCTTGGCGATATTGCTGTAATAGTAGGCGCTAAGTATGTAGTAAATGACGAGCTTGCTGTTAAGATGGAAGACATCGCTCTAAGCGATCTTGGTACTGCTAAGAGCGTACGCATCACAAAAGACGCA…
hungL74	Erinaceus roumanicus	Hungary	1	GGATATCTTTCGCCTTACTTTRTTACAAATGCTGAAAAAATGCTGGTGGAATTTGAAAATCCATACATATTCCTTACTGAAAAGAAGATTAATCTTGTACAAAGCATTCTACCAATCTTAGAAAACGTTGCACGGTCTGGAAGACCATTGCTCATCATAGCTGAAGACGTTGAAGGTGAAGCTCTGAGCACGCTTGTACTCAATAAGCTCCGTGGTGGCCTTCAAGTTGCTGCTGTAAAGGCGCCTGGTTTCGGTGACAGGAGAAAAGACATGCTTGGCGATATTGCTGTAATAGTAGGCGCTAAGTATGTAGTAAATGACGAGCTTGCTGTTAAGATGGAAGACATCGCTCTAAGCGATCTTGGTACTGCTAAGAGCGTACGCATCACAAAAGACGCA…
IF8	bird	Belgium	4	TGATCGCGGATATCTTTCGCCTTACTTTGTTACGAATGCTGAAAAGATGCTGGTGGAATTTGAAAATCCATACATATTCCTTACTGAAAAGAAGATTAATCTTGTACAGAGCATTTTACCAATATTAGAAAACGTTGCGAGAGCTGGTAGGCCATTGCTCATTATAGCTGAAGATGTTGAAGGTGAGGCTCTGAGCACACTTGTTCTAAATAAGCTACGTGGTGGGCTTCAAGTTGCTGCTGTGAAGGCGCCTGGTTTCGGTGATAGAAGGAAAGACATGCTAGGCGATATTGCTGTAATAGTAGGCGCTAAGTATGTAGTAAATGATGAGCTTGCTGTTAAGATGGAAGATATCGCTCTAAGCGATTTGGGTACTGCCAAGAGCGTGCGCATCACTAA…
IFmerel12	bird	Belgium	4	TGATCGCGGATATCTTTCGCCTTACTTTGTTACGAATGCTGAAAAGATGCTGGTGGAATTTGAAAATCCATACATATTCCTTACTGAAAAGAAGATTAATCTTGTACAGAGCATTTTACCAATATTAGAAAACGTTGCGAGAGCTGGTAGGCCATTGCTCATTATAGCTGAAGATGTTGAAGGTGAGGCTCTGAGCACACTTGTTCTAAATAAGCTACGTGGTGGGCTTCAAGTTGCTGCTGTGAAGGCGCCTGGTTTCGGTGATAGAAGGAAAGACATGCTAGGCGATATTGCTGTAATAGTAGGCGCTAAGTATGTAGTAAATGATGAGCTTGCTGTTAAGATGGAAGATATCGCTCTAAGCGATTTGGGTACTGCCAAGAGCGTGCGCATCACTAA…
IRmerel11	bird	Belgium	4	GGTATGCAGTTTGATCGCGGATATCTTTCGCCTTACTTTGTTACGAATGCTGAAAAGATGCTGGTGGAATTTGAAAATCCATACATATTCCTTACTGAAAAGAAGATTAATCTTGTACAGAGCATTTTACCAATATTAGAAAACGTTGCGAGAGCTGGTAGGCCATTGCTCATTATAGCTGAAGATGTTGAAGGTGAGGCTCTGAGCACACTTGTTCTAAATAAGCTACGTGGTGGGCTTCAAGTTGCTGCTGTGAAGGCGCCTGGTTTCGGTGATAGAAGGAAAGACATGCTAGGCGATATTGCTGTAATAGTAGGCGCTAAGTATGTAGTAAATGATGAGCTTGCTGTTAAGATGGAAGATATCGCTCTAAGCGATTTGGGTACTGCCAAGAGCGTG…
IRmerel118	bird	Belgium	4	TGATCGCGGATATCTTTCGCCTTACTTTGTTACGAATGCTGAAAAGATGCTGGTGGAATTTGAAAATCCATACATATTCCTTACTGAAAAGAAGATTAATCTTGTACAGAGCATTTTACCAATATTAGAAAACGTTGCGAGAGCTGGTAGGCCATTGCTCATTATAGCTGAAGATGTTGAAGGTGAGGCTCTGAGCACACTTGTTCTAAATAAGCTACGTGGTGGGCTTCAAGTTGCTGCTGTGAAGGCGCCTGGTTTCGGTGATAGAAGGAAAGACATGCTAGGCGATATTGCTGTAATAGTAGGCGCTAAGTATGTAGTAAATGATGAGCTTGCTGTTAAGATGGAAGATATCGCTCTAAGCGATTTGGGTACTGCCAAGAGCGTGCGCATCACTAA…
IRmerel14	bird	Belgium	4	ATCGCGGATATCTTTCGCCTTACTTTGTTACGAATGCTGAAAAGATGCTGGTGGAATTTGAAAATCCATACATATTCCTTACTGAAAAGAAGATTAATCTTGTACAGAGCATTTTACCAATATTAGAAAACGTTGCGAGAGCTGGTAGGCCATTGCTCATTATAGCTGAAGATGTTGAAGGTGAGGCTCTGAGCACACTTGTTCTAAATAAGCTACGTGGTGGGCTTCAAGTTGCTGCTGTGAAGGCGCCTGGTTTCGGTGATAGAAGGAAAGACATGCTAGGCGATATTGCTGTAATAGTAGGCGCTAAGTATGTAGTAAATGATGAGCTTGCTGTTAAGATGGAAGATATCGCTCTAAGCGATTTGGGTACTGCCAAGAGCGTGCGCATCACTAAAG…
JF494833	Canis familiaris	USA	1	TGTCAAATACGGTAGTCACGGGTGAGGTATTAGATAAGTCTATTAGGGAGGTAGTACGCATCCTAGAAGATGCAGTTGGTTGTACTGCTGGTCCTAAAGGCCTCACTGTAGCGATTAGTAAGCCTTATGGGTCGCCAGAGATCACAAAGGATGGCTACAAGGTAATGAAGAGTATAAAGCCTGAAGAACCACTGGCTGCCGCTATAGCGAGCATCATTACTCAGAGTGCTTCTCAGTGTAATGATAAGGTGGGAGATGGAACTACTACATGCTCCATACTAACAGCAAAAGTGATTGAAGAAGTCTCAAAAGCGAAAGCTGCTGGATCTGATATTGTTAGCATAAAGAATGGTATTCTCAAGGCTAAGGAAGCGGTTCTTACAGCGCTTATGTCTATGA…
JF494834	Neotoma sp.	USA	1	TGTCAAATACGGTAGTCACGGGTGAGGTATTAGATAAGTCTATTAGGGAGGTAGTACGCATCCTAGAAGATGCAGTTGGTTGTACTGCTGGTCCTAAAGGCCTCACTGTAGCGATTAGTAAGCCTTATGGGTCGCCAGAGATCACAAAGGATGGCTACAAGGTAATGAAGAGTATAAAGCCTGAAGAACCACTGGCTGCCGCTATAGCGAGCATCATTACTCAGAGTGCTTCTCAGTGTAATGATAAGGTGGGAGATGGAACTACTACATGCTCCATACTAACAGCAAAAGTGATTGAAGAAGTCTCAAAAGCAAAAGCTGCTGGATCTGATATTGTTAGCATAAAGAATGGTATTCTCAAGGCTAAGGAAGCGGTTCTTACAGCGCTTATGTCTATGA…
JF494835	Neotoma sp.	USA	1	TGTCAAATACGGTAGTCACGGGTGAGGTATTAGATAAGTCTATTAGGGAGGTAGTACGCATCCTAGAAGATGCAGTTGGTTGTACTGCTGGTCCTAAAGGCCTCACTGTAGCGATTAGTAAGCCTTATGGGTCGCCAGAGATCACAAAGGATGGCTACAAGGTAATGAAGAGTATAAAGCCTGAAGAACCACTGGCTGCCGCTATAGCGAGCATCATTACTCAGAGTGCTTCTCAGTGTAATGATAAGGTGGGAGATGGAACTACTACATGCTCCATACTAACAGCAAAAGTGATTGAAGAAGTCTCAAAAGCAAAAGCTGCTGGATCTGATATTGTTAGCATAAAGAATGGTATTCTCAAGGCTAAGGAAGCGGTTCTTACAGCGCTTATGTCTATGA…
JF494836	Neotoma sp.	USA	1	TGTCAAATACGGTAGTCACGGGTGAGGTATTAGATAAGTCTATTAGGGAGGTAGTACGCATCCTAGAAGATGCAGTTGGTTGTACTGCTGGTCCTAAAGGCCTCACTGTAGCGATTAGTAAGCCTTATGGGTCGCCAGAGATCACAAAGGATGGCTACAAGGTAATGAAGAGTATAAAGCCTGAAGAACCACTGGCTGCCGCTATAGCGAGCATCATTACTCAGAGTGCTTCTCAGTGTAATGATAAGGTGGGAGATGGAACTACTACATGCTCCATACTAACAGCAAAAGTGATTGAAGAAGTCTCAAAAGCGAAAGCTGCTGGATCTGATATTGTTAGCGTAAAGAATGGTATTCTCAAGGCTAAGGAAGCGGTTCTTACAGCGCTTATGTCTATGA…
JF494837	Neotoma sp.	USA	1	TGTCAAATACGGTAGTCACGGGTGAGGTATTAGATAAGTCTATTAGGGAGGTAGTACGCATCCTAGAAGATGCAGTTGGTTGTACTGCTGGTCCTAAAGGCCTCACTGTAGCGATTAGTAAGCCTTATGGGTCGCCAGAGATCACAAAGGATGGCTACAAGGTAATGAAGAGTATAAAGCCTGAAGAACCACTGGCTGCCGCTATAGCGAGCATCATTACTCAGAGTGCTTCTCAGTGTAATGATAAGGTGGGAGATGGAACTACTACATGCTCCATACTAACAGCAAAAGTGATTGAAGAAGTCTCAAAAGCGAAAGCTGCTGGATCTGATATTGTTAGCATAAAGAATGGTATTCTCAAGGCTAAGGAAGCGGTTCTTACAGCGCTTATGTCTATGA…
JF494838	Neotoma sp.	USA	1	TGTCAAATACGGTAGTCACGGGTGAGGTATTAGATAAGTCTATTAGGGAGGTAGTACGCATCCTAGAAGATGCAGTTGGTTGTACTGCTGGTCCTAAAGGCCTCACTGTAGCGATTAGTAAGCCTTATGGGTCGCCAGAGATCACAAAGGATGGCTACAAGGTAATGAAGAGTATAAAGCCTGAAGAACCACTGGCTGCCGCTATAGCGAGCATCATTACTCAGAGTGCTTCTCAGTGTAATGATAAGGTGGGAGATGGAACTACTACATGCTCCATACTAACAGCAAAAGTGATTGAAGAAGTCTCAAAAGCGAAAGCTGCTGGATCTGATATTGTTAGCATAAAGAATGGTATTCTCAAGGCTAAGGAAGCGGTTCTTACAGCGCTTATGTCTATGA…
JF494839	Homo sapiens	USA	1	TGTCAAATACGGTAGTCACGGGTGAGGTATTAGATAAGTCTATTAGGGAGGTAGTACGCATCCTAGAAGATGCAGTTGGTTGTACTGCTGGTCCTAAAGGCCTCACTGTAGCGATTAGTAAGCCTTATGGGTCGCCAGAGATCACAAAGGATGGCTACAAGGTAATGAAGAGTATAAAGCCTGAAGAACCACTGGCTGCCGCTATAGCGAGCATCATTACTCAGAGTGCTTCTCAGTGTAATGATAAGGTGGGAGATGGAACTACTACATGCTCCATACTAACGGCAAAAGTGATTGAAGAAGTCTCAAAAGCGAAAGCTGCTGGATCTGATATTGTTAGCATAAAGAATGGTATTCTCAAGGCTAAGGAAGCGGTTCTTACAGCGCTTATGTCTATGA…
JF494840	Equus caballus	USA	1	TGTCAAATACGGTAGTCACGGGTGAGGTATTAGATAAGTCTATTAGGGAGGTAGTACGCATCCTAGAAGATGCAGTTGGTTGTACTGCTGGTCCTAAAGGCCTCACTGTAGCGATTAGTAAGCCTTATGGGTCGCCAGAGATCACAAAGGATGGCTACAAGGTAATGAAGAGTATAAAGCCTGAAGAACCACTGGCTGCCGCTATAGCGAGCATCATTACTCAGAGTGCTTCTCAGTGTAATGATAAGGTGGGAGATGGAACTACTACATGCTCCATACTAACAGCAAAAGTGATTGAAGAAGTCTCAAAAGCGAAAGCTGCTGGATCTGATATTGTTAGCATAAAGAATGGTATTCTCAAGGCTAAGGAAGCGGTTCTTACAGCGCTTATGTCTATGA…
JF494841	Neotoma sp.	USA	1	TGTCAAATACGGTAGTCACGGGTGAGGTATTAGATAAGTCTATTAGGGAGGTAGTACGCATCCTAGAAGATGCAGTTGGTTGTACTGCTGGTCCTAAAGGCCTCACTGTAGCGATTAGTAAGCCTTATGGGTCGCCAGAGATCACAAAGGATGGCTACAAGGTAATGAAGAGTATAAAGCCTGAAGAACCACTGGCTGCCGCTATAGCGAGCATCATTACTCAGAGTGCTTCTCAGTGTAATGATAAGGTGGGAGATGGAACTACTACATGCTCCATACTAACAGCAAAAGTGATTGAAGAAGTCTCAAAAGCGAAAGCTGCTGGATCTGATATTGTTAGCATAAAGAATGGTATTCTCAAGGCTAAGGAAGCTGTTCTTACAGCGCTTATGTCTATGA…
JF893915	Equus caballus	Germany	1	GGATATCTTTCGCCTTACTTTGTTACAAATGCTGAAAAAATGCTGGTGGAATTTGAAAATCCATACATATTCCTTACTGAAAAGAAGATTAATCTTGTACAAAGCATTCTACCAATCTTAGAAAACGTTGCACGGTCTGGAAGACCATTGCTCATCATAGCTGAAGACGTTGAAGGTGAAGCTCTGAGCACGCTTGTACTCAATAAGCTCCGTGGTGGCCTTCAAGTTGCTGCTGTAAAGGCGCCTGGTTTTGGTGACAGGAGAAAAGACATGCTTGGCGATATTGCTGTAATAGTAGGCGCTAAGTATGTAGTAAATGACGAGCTTGCTGTTAAGATGGAAGACATCGCTCTAAGCGATCTTGGTACTGCTAAGAGCGTACGCATCACAAAAGACGCA…
JN005744	Capreolus capreolus	Poland	2	AAAGTTTAGGAGGTTCAAAAATGTCAAATACGGTAGTCACGGGTGAGGTATTAGATAAGTCTATTAGGGAGGTAGTACGCATCCTAGAAGATGCAGTTGGTTGTACTGCTGGTCCTAAAGGCCTCACTGTAGCGATTAGTAAGCCTTATGGGTCGCCAGAGATCACAAAGGATGGCTACAAGGTAATGAAGAGTATAAAGCCTGAAGAACCACTGGCTGCCGCTATAGCGAGCATCATTACTCAGAGTGCTTCTCAGTGCAATGATAAGGTGGGAGATGGAACTACTACATGCTCCATACTGACAGCAAAAGTGATTGAAGAAGTCTCAAAAGCGAAAGCTGCTGGATCTGATATTGTTAGCATAAAGAATGGTATTCTCAAGGCTAAGGAAGCGGTTC…
JN005745	Capreolus capreolus	Poland	2	GGGAGATGGAACTACTACATGCTCCATACTGACAGCAAAAGTGATTGAAGAAGTCTCAAAAGCGAAAGCTGCTGGATCTGATATTGTTAGCATAAAGAATGGTATTCTCAAGGCTAAGGAAGCGGTTCTTACAGCGCTTATGTCTATGAGACGTGAAGTAGAAGAAGACGAAATTGCACAAGTTGCAACATTGTCTGCAAATGGAGACAAGAACATAGGAAGTAAGATTGCACAGTGTGTTAAAGAAGTCGGTAAAGACGGTGTTATAACTGTTGAAGAAAGCAAAGGCTTCAAGGATCTAGAAGTTGAAAAGACTGATGGTATGCAGTTTGATCGCGGATATCTTTCGCCTTACTTTGTTACAAATGCTGAAAAAATGCTGGTGGAATTTGAAAATCC…
JN005746	Capreolus capreolus	Poland	2	AGTTTAGGAGGTTCAAAAATGTCAAATACGGTAGTCACGGGTGAGGTATTAGATAAGTCTATTAGGGAGGTAGTACGCATCCTAGAAGATGCAGTTGGTTGTACTGCTGGTCCTAAAGGCCTCACTGTAGCGATTAGTAAGCCTTATGGGTCGCCAGAGATCACAAAGGATGGCTACAAGGTAATGAAGAGTATAAAGCCTGAAGAACCACTGGCTGCCGCTATAGCGAGCATCATTACTCAGAGTGCTTCTCAGTGTAATGATAAGGTGGGAGATGGAACTACTACATGCTCCATACTGACAGCAAAAGTGATTGAAGAAGTCTCAAAAGCGAAAGCTGCTGGATCTGATATTGTTAGCATAAAGAATGGTATTCTCAAGGCTAAGGAAGCGGTTCTT…
JN005747	Capreolus capreolus	Poland	2	AGTTTAGGAGGTTCAAAAATGTCAAATACGGTAGTCACGGGTGAGGTATTAGATAAGTCTATTAGGGAGGTAGTACGCATCCTAGAAGATGCAGTTGGTTGTACTGCTGGTCCTAAAGGCCTCACTGTAGCGATTAGTAAGCCTTATGGGTCGCCAGAGATCACAAAGGATGGCTACAAGGTAATGAAGAGTATAAAGCCTGAAGAACCACTGGCTGCCGCTATAGCGAGCATCATTACTCAGAGTGCTTCTCAGTGTAATGATAAGGTGGGAGATGGAACTACTACATGCTCCATACTGACAGCAAAAGTGATTGAAGAAGTCTCAAAAGCGAAAGCTGCTGGATCTGATATTGTTAGCATAAAGAATGGTATTCTCAAGGCTAAGGAAGCGGTTCTT…
JN005748	Capreolus capreolus	Poland	1	AGTTTAGGAGGTTCAAAAATGTCAAATACGGTAGTCACGGGTGAGGTATTAGATAAGTCTATTAGGGAGGTAGTACGCATCCTAGAAGATGCAGTTGGTTGTACTGCTGGTCCTAAAGGCCTCACTGTAGCGATTAGTAAGCCTTATGGGTCGCCAGAGATCACAAAGGATGGCTACAAGGTAATGAAGAGTATAAAGCCTGAAGAACCACTGGCTGCCGCTATAGCGAGCATCATTACTCAGAGTGCTTCTCAGTGTAATGATAAGGTGGGAGATGGAACTACTACATGCTCCATACTAACAGCAAAAGTGATTGAAGAAGTCTCAAAAGCGAAAGCTGCTGGATCTGATATTGTTAGCATAAAGAATGGTATTCTCAAGGCTAAGGAAGCGGTTCTC…
JN055359	Cervus nippon	Japan	2	ATGTCAAATACGGTAGTCTCGGGTGAGATGTTGGATAAGGCCATTCGCGAGGTAATACGCACTCTCGAAGACGCAGTTGGGTGCACAGCAGGTCCGAAGGGTCTTACTGTCGCCATTAGCAAGCCTTATGGGTCACCAGAAATAACTAAGGATGGCTACAAGGTAATGAAGAGCATAAAACCTGAAGAGCCGTTGGCGGCTGCTATAGCTAGCATAATTACCCAGAGTGCCTCTCAGTGTAATGATAAGGTGGGCGACGGTACGACCACGTGTTCCATACTAACTGCAAAGGTTATTGAGGAAGTTTCTCGCGCCAAGGCTGCTGGGTCTGACATTGTAAGTATTCGGAACGGTATCTTGAAAGCAAAAGAGGCGGTACTATCATCTCTGATGTCTATG…
JN055360	Cervus nippon	Japan	2	ATGTCAAATACGGTAGTCTCGGGTGAGATGTTGGATAAGGCCATTCGCGAGGTAATACGCACTCTCGAAGACGCAGTTGGGTGCACAGCAGGTCCGAAGGGTCTTACTGTCGCCATTAGCAAGCCTTATGGCTCACCAGAAATAACTAAGGATGGCTACAAGGTAATGAAGAGCATAAAACCTGAAGAGCCGTTGGCGGCTGCTATAGCTAGCATAATTACCCAGAGTGCCTCTCAGTGTAATGATAAGGTGGGCGACGGTACGACCACGTGTTCCATACTAACTGCAAAGGTTATTGAGGAAGTTTCTCGCGCCAAGGCTGCTGGGTCTGACATTGTAAGTATTCGGAACGGTATCTTGAAAGCAAAAGAGGCGGTACTATCATCTCTGATGTCTATG…
JN656296	Canis familiaris	Finland	1	GGATATCTTTCGCCTTACTTTGTTACAAATGCTGAAAAAATGCTGGTGGAATTTGAAAATCCATACATATTTCTTACTGAAAAGAAGATTAATCTTGTACAAAGCATTCTACCAATCTTAGAAAACGTTGCACGGTCTGGAAGACCATTGCTCATCATAGCTGAAGACGTTGAAGGTGAAGCTCTGAGCACGCTTGTACTCAATAAGCTCCGTGGTGGCCTTCAAGTTGCTGCTGTAAAGGCGCCTGGTTTTGGTGACAGGAGAAAAGACATGCTTGGCGATATTGCTGTAATAGTAGGCGCTAAGTATGTAGTAAATGACGAGCTTGCTGTTAAGATGGAAGATATCGCTCTAAGCGATCTTGGTACTGCTAAGAGCGTACGCATCACAAAAGACGCA…
JN935930	goat/sheep	Slovakia	2	AAGTTGCTGCTGTAAAGGCGCCTGGTTTCGGTGATAGAAGAAAAGACATGCTTGGCGATATTGCTGTAATAGTAGGCGCTAAGTATGTAGTAAATGACGAGCTTGCTGTTAAGATGGAAGATATCGCTCTAAGCGATCTTGGTACTGCTAAGAGCGTACGCATCACAAAAGACGCAACTACTATCATAGGTAGTGTTGATAGCAGTTCTGAAAGCATAGCTAGCAGGACTAATCAAATCAAAGCTCAGATAGAAAATTCTAGTTCTGATTATGACAAGGAAAAGCTTAGAGAACGTTTAGCGAAGCTTTCCGGTGGCGTTGCTGTACTCAAGGTTGGTGGATCCAGCGAAGTTGAGGTGAAGGAACGCAAAGACAGAGTAGAAGATGC
KC583431	Myodes rufocanus	Russia	3	TAGTCTTATGCTCCAGTTGTTTGTTCTATTGGTCTAAAGTTTAGGAGGTTCAAAAATGTCAAATACGGTAGTCACGGGTGAGGTGTTGGATAAGTCTATTAGGGAAGTAGTACGCATCCTCGAAGATGCAGTTGGTTGTACTGCTGGTCCTAAAGGCCTCACTGTAGCGATTAGTAAGCCTTATGGGTCGCCAGAGATCACAAAGGATGGCTACAAGGTAATGAAGAGTATAAAGCCTGAAGAACCACTGGCTGCCGCTATAGCGAGCATCATTACTCAGAGTGCTTCTCAGTGTAATGATAAGGTGGGAGATGGAACTACTACATGCTCCATACTGACAGCTAAGGTAATCGAGGAAGTCTCAAAAGCAAAAGCTGCGGGATCTGATATTGTTAGCAT…
KC583432	Myodes rutilus	Russia	3	TAGTCTTATGCTCCAGTTGTTTGTTCTATTGGTCTAAAGTTTAGGAGGTTCAAAAATGTCAAATACGGTAGTCACGGGTGAGGTGTTAGATAAGTCTATTAGGGAAGTAGTACGCATCCTCGAGGATGCAGTTGGTTGTACTGCTGGTCCTAAAGGCCTCACTGTAGCGATTAGTAAGCCTTATGGGTCGCCAGAGATCACAAAGGATGGCTACAAGGTAATGAAGAGTATAAAGCCTGAAGAACCACTGGCTGCCGCTATAGCGAGCATCATTACTCAGAGTGCTTCTCAGTGTAATGATAAGGTGGGAGATGGAACTACTACATGCTCCATACTGACAGCTAAGGTAATCGAGGAAGTCTCAAAAGCAAAAGCTGCGGGATCTGATATTGTTAGCAT…
KC583433	Myodes glareolus	Russia	2	TAGTCTTATGCTACAGTTGTTTGTTCTATTGGTCTAAAGTTTAGGAGGTTCAAAAATGTCAAATACGGTAGTCACGGGTGAGGTATTAGATAAGTCTATTAGGGAGGTAGTACGCATCCTAGAAGATGCAGTTGGTTGTACTGCTGGTCCTAAAGGCCTCACTGTAGCGATTAGTAAGCCTTATGGGTCACCAGAGATCACAAAGGATGGCTACAAGGTAATGAAGAGTATAAAGCCTGAAGAACCACTGGCTGCCGCTATAGCGAGCATCATTACTCAGAGTGCTTCTCAGTGTAATGATAAGGTGGGAGATGGAACTACTACATGCTCCATACTGACAGCAAAAGTGATTGAAGAAGTCTCAAAAGCGAAAGCTGCTGGATCTGATATTGTTAGCAT…
KC753762	Myodes rufocanus	Russia	3	GAGCATAGTCTTATGCTCCAGTTGTTTGTTCTATTGGTCTAAAGTTTAGGAGGTTCAAAAATGTCAAATACGGTAGTCACGGGTGAGGTGTTAGATAAGTCTATTAGGGAAGTAGTACGCATCCTCGAAGATGCAGTTGGTTGTACTGCTGGTCCTAAAGGCCTCACTGTAGCGATTAGTAAGCCTTATGGGTCGCCAGAGATCACAAAGGATGGCTACAAGGTAATGAAGAGTATAAAGCCTGAAGAACCACTGGCTGCCGCTATAGCGAGCATCATTACTCAGAGTGCTTCTCAGTGTAATGATAAGGTGGGAGATGGAACTACTACATGCTCCATACTGACAGCTAAGGTAATCGAGGAAGTCTCAAAAGCAAAAGCTGCGGGATCTGATATTGTT…
KC800984	Alces alces	Sweden	2	GTTTAGGAGGTTCATAAATGTCAAATACGGTAGGCACGGGTGAGGTAGTAGATAAGTCTATTAGGGAGGTAGTACGCATCCTAGAAGATGCAGTTGGTTGTACTGCTGGTCCTAAAGGCCTCACTGTAGCGATTAGTAAGCCTTATGGGTCGCCAGAGATCACAAAGGATGGCTACAAGGTAATGAAGAGTATAAAGCCTGAAGAACCACTGGCTGCCGCTATAGCGAGCATCATTACTCAGAGTGCTTCTCAGTGTAATGATAAGGTGGGAGATGGAACTACTACATGCTCCATACTGACAGCAAAAGTGATTGAAGAAGTCTCAAAAGCGAAAGCTGCTGGATCTGATATTGTTAGCATAAAGAATGGTATTCTCAAGGCTAAGGAAGCGGTTCTTA…
KC800986	Alces alces	Sweden	1	GTTTAGGAGGTTCAAAAATGTCAAATACGGTAGTCACGGGTGAGGTATTAGATAAGTCTATTAGGGAGGTAGTACGCATCCTAGAAGATGCAGTTGGTTGTACTGCTGGTCCTAAAGGCCTCACTGTAGCGATTAGTAAGCCTTATGGGTCGCCAGAGATCACAAAGGATGGCTACAAGGTAATGAAGAGTATAAAGCCTGAAGAACCACTGGCTGCCGCTATAGCGAGCATCATTACTCAGAGTGCTTCTCAGTGTAATGATAAGGTGGGAGATGGAACTACTACATGCTCCATACTAACAGCAAAAGTGATTGAAGAAGTCTCAAAAGCGAAAGCTGCTGGATCTGATATTGTTAGCATAAAGAATGGTATTCTCAAGGCTAAGGAAGCGGTTCTTA…
KF015601	Homo sapiens	Poland	1	TTATGCTACGGTTGTTTGTTCTATTGGTCTAAAGTTTAGGAGGTTCAAAAATGTCAAATACGGTAGTCACGGGTGAGGTATTAGATAAGTCTATTAGGGAAGTAGTACGCATCCTAGAAGATGCAGTTGGTTGTACTGCTGGTCCTAAAGGCCTCACTGTAGCGATTAGTAAGCCTTATGGGTCGCCAGAGATCACAAAGGATGGCTACAAGGTAATGAAGAGTATAAAGCCTGAAGAACCACTGGCTGCCGCTATAGCGAGCATCATTACTCAGAGTGCTTCTCAGTGTAATGATAAGGTGGGAGATGGAACTACTACATGCTCCATACTAACAGCAAAAGTGATTGAAGAAGTCTCAAAAGCGAAAGCTGCTGGATCTGATATTGTTAGCATAAAGA…
KF031385	Rodentia	Italy	3	GAGGTGTTAGATAAGTCTATTAGGGAAGTAGTACGCATCCTCGAAGATGCAGTTGGTTGTACTGCTGGTCCTAAAGGCCTCACTGTAGCGATTAGTAAGCCTTATGGGTCGCCAGAGATCACAAAGGATGGCTACAAGGTAATGAAGAGTATAAAGCCTGAAGAACCACTGGCTGCCGCTATAGCGAGCATCATTACTCAGAGTGCTTCTCAGTGTAATGATAAGGTGGGAGATGGAACTACTACATGCTCCATACTGACAGCTAAGGTAATTGAGGAAGTCTCAAAAGCAAAAGCTGCGGGATCTGATATTGTTAGCATAAAGAATGGTATTCTTAAGGCTAAAGAAGCAGTTCTAACAGCGTTGATGTCTATGAGACGTGAAGTGGAAGAAGATGAA…
KF031387	goat/sheep	Italy	2	GAGGTATTAGATAAGTCTATTAGGGAGGTAGTACGCATCCTAGAAGATGCAGTTGGTTGTACTGCTGGTCCTAAAGGCCTCACTGTAGCGATTAGTAAGCCTTATGGGTCGCCAGAGATCACAAAGGATGGCTACAAGGTAATGAAGAGTATAAAGCCTGAAGAACCACTGGCTGCCGCTATAGCGAGCATCATTACTCAGAGTGCTTCTCAGTGTAATGATAAGGTGGGAGATGGAACTACTACATGCTCCATACTGACAGCAAAAGTGATTGAAGAAGTCTCAAAAGCGAAAGCTGCTGGATCTGATATTGTTAGCATAAAGAATGGTATTCTCAAGGCTAAGGAAGCGGTTCTTACAGCGCTTATGTCTATGAGACGTGAAGTAGAAGAAGACGAA…
KF031392	rodent	Italy	2	GAGGTATTAGATAAGTCTATTAGGGAGGTAGTACGCATCCTAGAAGATGCAGTTGGTTGTACTGCTGGTCCTAAAGGCCTCACTGTAGCGATTAGTAAGCCTTATGGGTCGCCAGAGATCACAAAGGATGGCTACAAGGTAATGAAGAGTATAAAGCCTGAAGAACCACTGGCTGCCGCTATAGCGAGCATCATTACTCAGAGTGCTTCTCAGTGTAATGATAAGGTGGGAGATGGAACTACTACATGCTCCATACTGACAGCAAAAGTGATTGAAGAAGTCTCAAAAGCGAAAGCTGCTGGATCTGATATTGTTAGCATAAAGAATGGTATTCTCAAGGCTAAGGAAGCGGTTCTTACAGCGCTTATGTCTATGAGACGTGAAGTAGAAGAAGACGAA…
KF383228	Myodes glareolus	Slovakia	3	TTATGCTACGGTTGTTTGTTCTATTGGTCTAAAGTTTAGGAGGTTCAAAAATGTCAAATACGGTAGTCACGGGTGAGGTGTTAGATAAGTCTATTAGGGAAGTAGTACGCATCCTCGAAGATGCAGTTGGTTGTACTGCTGGTCCTAAAGGCCTCACTGTAGCGATTAGTAAGCCTTATGGGTCGCCAGAGATCACAAAGGATGGCTACAAGGTAATGAAGAGTATAAAGCCTGAAGAACCACTGGCTGCCGCTATAGCGAGCATCATTACTCAGAGTGCTTCTCAGTGTAATGATAAGGTGGGAGATGGAACTACTACATGCTCCATACTGACAGCTAAGGTAATTGAGGAAGTCTCAAAAGCAAAAGCTGCGGGATCTGATATTGTTAGCATAAAGA…
KF383230	Myodes glareolus	Slovakia	3	TTATGCTACGGTTGTTTGTTCTATTGGTCTAAAGTTTAGGAGGTTCAAAAATGTCAAATACGGTAGTCACGGGTGAGGTGTTAGATAAGTCTATTAGGGAAGTAGTACGCATCCTCGAAGATGCAGTTGGTTGTACTGCTGGTCCTAAAGGCCTCACTGTAGCGATTAGTAAGCCTTATGGGTCGCCAGAGATCACAAAGGATGGCTACAAGGTAATGAAGAGTATAAAGCCTGAAGAACCACTGGCTGCCGCTATAGCGAGCATCATTACTCAGAGTGCTTCTCAGTGTAATGATAAGGTGGGAGATGGAACTACTACATGCTCCATACTGACAGCTAAGGTAATTGAGGAAGTCTCAAAAGCAAAAGCTGCGGGATCTGATATTGTTAGCATAAAGA…
KF569921	Capra aegagrus	China	2	ATGGTATGCAGTTTGATCGCGGATATCTCTCCCCATACTTTGTAACAAACGCTGAAAAGATGCTAGTGGAGTTTGAAAACCCATACATATTTTTAACAGAAAAGAAAATCAACATAGTTCGCAGTATTTTGCCAGTTTTGGAAGGCGTTGCTAAATCTGGAAGGCCACTATTGATAATTGCAGAAGACGTTGAGGGTGAAGCATTGAGCACTTTGGTACTCAATAAATTGCACGGTGGACTACAAGTTGCCGCTGTTAAGGCTCCTGGCTTTGGTGACAGACGGAAAGACATGCTTGGTGACATAGCAGTTATAGTTGGAGCTCGTTATGTTGTGAACGATGAGCTAGCTGTTAAGATGGAGGACATCACTTTGGCTGATCTTGGTACTGCTAAGAATG…
KF569925	Capra aegagrus	China	2	ATGGTATGCAGTTTGATCGCGGATATCTCTCCCCATACTTTGTAACAAACGCTGAAAAGATGCTAGTGGAGTTTGAAAACCCATACATATTTTTAACAGAAAAGAAAATCAACATAGTTCGCAGTATTTTGCCAGTTTTGGAAGGCGTTGCTAAATCTGGAAGGCCACTATTGATAATTGCAGAAGACGTTGAGGGTGAAGCATTGAGCACTTTGGTACTCAATAAATTGCACGGTGGACTACAAGTTGCCGCTGTTAAGGCTCCTGGCTTTGGTGACAGACGGAAAGACATGCTTGGTGACATAGCAGTTATAGTTGGAGCTCGTTATGTTGTGAACGATGAGCTAGCTGTTAAGATGGAGGACATCACTTTGGCTGATCTTGGTACTGCTAAGAATG…
KF745743	Myodes rutilus	Russia	3	TAGTCTTATGCTCCAGTTGTTTGTTCTATTGGTCTAAAGTTTAGGAGGTTCAAAAATGTCAAATACGGTAGTCACGGGTGAGGTGTTAGATAAGTCTATTAGGGAAGTAGTACGCATCCTCGAAGATGCAGTTGGTTGTACTGCTGGTCCTAAAGGCCTCACTGTAGCGATTAGTAAGCCTTATGGGTCGCCAGAGATCACAAAGGATGGCTACAAGGTAATGAAGAGTATAAAGCCTGAAGAACCACTGGCTGCCGCTATAGCGAGCATCATTACTCAGAGTGCTTCTCAGTGTAATGATAAGGTGGGAGATGGAACTACTACATGCTCCATACTGACAGCTAAGGTAATCGAGGAAGTCTCAAAAGCAAAAGCTGCGGGATCTGATATTGTTAGCAT…
KF745744	Myodes rutilus	Russia	3	TAGTCTTATGCTCCGGTTGTTTGTTCTATTGGTCTAAAGTTTAGGAGGTTCAAAAATGTCAAATACGGTAGTCACGGGTGAGGTGTTAGATAAGTCTATTAGGGAAGTAGTACGCATCCTCGAAGATGCAGTTGGTTGTACTGCTGGTCCTAAAGGCCTCACTGTAGCGATTAGTAAGCCTTATGGGTCGCCAGAGATCACAAAGGATGGCTACAAGGTAATGAAGAGTATAAAGCCTGAAGAGCCACTGGCTGCCGCTATAGCGAGCATCATTACTCAGAGTGCTTCTCAGTGTAATGATAAGGTGGGAGATGGCACTACTACATGCTCCATACTGACAGCTAAGGTGATCGAGGAAGTCTCAAAGGCAAAAGCTGCGGGATCCGATATTGTTAGCAT…
KF836094.dog1	Canis familiaris	Brazil	1	GGTTGTTTGTTCTATTGGTCTAAAGTTTAGGAGGTTCAAAAATGTCAAATACGGTAGTCACGGGTGAGGTATTAGATAAGTCTATTAGGGAAGTAGTACGCATCCTAGAAGATGCAGTTGGTTGTACTGCTGGTCCTAAAGGCCTCACTGTAGCGATTAGTAAGCCTTATGGGTCGCCAGAGATCACAAAGGATGGCTACAAGGTAATGAAGAGTATAAAGCCTGAAGAACCACTGGCTGCCGCTATAGCGAGCATCATTACTCAGAGTGCTTCTCAGTGTAATGATAAGGTGGGAGATGGAACTACTACATGCTCCATACTAACAGCAAAAGTGATTGAAGAAGTCTCAAAAGCGAAAGCTGCTGGATCTGATATTGTTAGCATAAAGAATGGTATTC…
KJ622307	Ursus arctos	Slovenia	1	TTATGCTACGGTTGTTTGTTCTATTGGTCTAAAGTTTAGGAGGTTCAAAAATGTCAAATACGGTAGTCACGGGTGAGGTATTAGATAAGTCTATTAGGGAGGTAGTACGCATCCTAGAAGATGCAGTTGGTTGTACTGCTGGTCCTAAAGGCCTCACTGTAGCGATTAGTAAGCCTTATGGGTCGCCAGAGATCACAAAGGATGGCTACAAGGTAATGAAGAGTATAAAGCCTGAAGAACCACTGGCTGCCGCTATAGCGAGCATCATTACTCAGAGTGCTTCTCAGTGTAATGATAAGGTGGGAGATGGAACTACTACATGCTCCATACTAACAGCAAAAGTGATTGAAGAAGTCTCAAAAGCGAAAGCTGCTGGATCTGATATTGTTAGCATAAAGA…
KJ677107	Homo sapiens	South Korea	2	AGCATAGTCTTATGCTACGGTTGTTTGTTCTATTGGTCTAAAGTTTAGGAGGTTCAAAAATGTCAAATACGGTAGTCACGGGTGAGGTATTAGATAAGTCTATTAGGGAGGTAGTACGCATCCTAGAAGATGCAGTTGGTTGTACTGCTGGTCCTAAGGGCCTCACTGTAGCGATTAGTAAGCCTTATGGGTCACCAGAGATCACAAAGGATGGCTACAAGGTAATGAAGAGTATAAAGCCTGAAGAACCACTGGCTGCCGCTATAGCGAGCATCATTACTCAGAGTGCTTCTCAGTGTAATGATAAGGTGGGAGATGGAACTACTACATGCTCCATACTGACAGCAAAAGTGATTGAAGAAGTCTCAAAAGCGAAAGCTGCTGGATCTGATATTGTTA…
KJ832449	Capreolus capreolus	France	2	ATGTCAAATACGGTAGTCACGGGTGAGGTATTAGATAAGTCTATTAGGGAGGTAGTACGCATCCTAGAAGATGCAGTTGGTTGTACTGCTGGTCCTAAAGGCCTCACTGTAGCGATTAGTAAGCCTTATGGGTCGCCAGAGATCACAAAGGATGGCTACAAGGTAATGAAGAGTATAAAGCCTGAAGAACCACTGGCTGCCGCTATAGCGAGCATCATTACTCAGAGTGCTTCTCAGTGTAATGATAAGGTGGGAGATGGAACTACTACATGCTCCATACTGACAGCAAAAGTGATTGAAGAAGTCTCAAAAGCAAAAGCTGCTGGATCTGATATTGTTAGCATAAAGAATGGTATTCTCAAGGCTAAGGAAGCGGTTCTTACAGCGCTTATGTCTATG…
KJ832450	Capreolus capreolus	France	2	ATGTCAAATACGGTAGTCACGGGTGAGGTATTAGATAAGTCTATTAGGGAGGTAGTACGCATCCTAGAAGATGCAGTTGGTTGTACTGCTGGTCCTAAAGGCCTCACTGTAGCGATTAGTAAGCCTTATGGGTCGCCAGAGATCACAAAGGATGGCTACAAGGTAATGAAGAGTATAAAGCCTGAAGAACCACTGGCTGCCGCTATAGCGAGCATCATTACTCAGAGTGCTTCTCAGTGTAATGATAAGGTGGGAGATGGAACTACTACATGCTCCATACTGACAGCAAAAGTGATTGAAGAAGTCTCAAAAGCGAAAGCTGCTGGATCTGATATTGTTAGCATAAAGAATGGTATTCTCAAGGCTAAGGAAGCGGTTCTTACAGCGCTTATGTCTATG…
KJ832451	Capreolus capreolus	France	2	ATGTCAAATACGGTAGTCACGGGTGAGGTATTAGATAAGTCTATTAGGGAGGTAGTACGCATCCTAGAAGATGCAGTTGGTTGTACTGCTGGTCCTAAAGGCCTCACTGTAGCGATTAGTAAGCCTTATGGGTCGCCAGAGATCACAAAGGATGGCTACAAGGTAATGAAGAGTATAAAGCCTGAAGAACCACTGGCTGCCGCTATAGCGAGCATCATTACTCAGAGTGCTTCTCAGTGTAATGATAAGGTGGGAGATGGAACTACTACATGCTCCATACTGACAGCAAAAGTGATTGAAGAAGTCTCAAAAGCGAAAGCTGCTGGATCTGATATTGTTAGCATAAAGAATGGTATTCTCAAGGCTAAGGAAGCGGTTCTTACAGCGCTTATGTCTATG…
KJ832452	Capreolus capreolus	France	2	ATGTCAAATACGGTAGTCACGGGTGAGGTATTAGATAAGTCTATTAGGGAGGTAGTACGCATCCTAGAAGATGCAGTTGGTTGTACTGCTGGTCCTAAAGGCCTCACTGTAGCGATTAGTAAGCCTTATGGGTCGCCAGAGATCACAAAGGATGGCTACAAGGTAATGAAGAGTATAAAGCCTGAAGAACCACTGGCTGCCGCTATAGCGAGCATCATTACTCAGAGTGCTTCTCAGTGTAATGATAAGGTGGGAGATGGAACTACTACATGCTCCATACTGACAGCAAAAGTGATTGAAGAAGTCTCAAAAGCGAAAGCTGCTGGATCTGATATTGTTAGCATAAAGAATGGTATTCTCAAGGCTAAGGAAGCGGTTCTTACAGCGCTTATGTCTATG…
KJ832453	Capreolus capreolus	France	2	ATGTCAAATACGGTAGTCACGGGTGAGGTATTAGATAAGTCTATTAGGGAGGTAGTACGCATCCTAGAAGATGCAGTTGGTTGTACTGCTGGTCCTAAAGGCCTCACTGTAGCGATTAGTAAGCCTTATGGGTCGCCAGAGATCACAAAGGATGGCTACAAGGTAATGAAGAGTATAAAGCCTGAAGAACCACTGGCTGCCGCTATAGCGAGCATCATTACTCAGAGTGCTTCTCAGTGTAATGATAAGGTGGGAGATGGAACTACTACATGCTCCATACTGACAGCAAAAGTGATTGAAGAAGTCTCAAAAGCGAAAGCTGCTGGATCTGATATTGTTAGCATAAAGAATGGTATTCTCAAGGCTAAGGAAGCGGTTCTTACAGCGCTTATGTCTATG…
KJ832457	Capreolus capreolus	France	2	ATGTCAAATACGGTAGTCACGGGTGAGGTATTAGATAAGTCTATTAGGGAGGTAGTACGCATCCTAGAAGATGCAGTTGGTTGTACTGCTGGTCCTAAAGGCCTCACTGTAGCGATTAGTAAGCCTTATGGGTCGCCAGAGATCACAAAGGATGGCTACAAGGTAATGAAGAGTATAAAGCCTGAAGAACCACTGGCTGCCGCTATAGCGAGCATCATTACTCAGAGTGCTTCTCAGTGTAATGATAAGGTGGGAGATGGAACTACTACATGCTCCATACTGACAGCAAAAGTGATTGAAGAAGTCTCAAAAGCGAAAGCTGCTGGATCTGATATTGTTAGCATAAAGAATGGTATTCTCAAGGCTAAGGAAGCGGTTCTTACAGCGCTTATGTCTATG…
KJ832458	Capreolus capreolus	France	2	ATGTCAAATACGGTAGTCACGGGTGAGGTATTAGATAAGTCTATTAGGGAGGTAGTACGCATCCTAGAAGATGCAGTTGGTTGTACTGCTGGTCCTAAAGGCCTCACTGTAGCGATTAGTAAGCCTTATGGGTCGCCAGAGATCACAAAGGATGGCTACAAGGTAATGAAGAGTATAAAGCCTGAAGAACCACTGGCTGCCGCTATAGCGAGCATCATTACTCAGAGTGCTTCTCAGTGTAATGATAAGGTGGGAGATGGAACTACTACATGCTCCATACTGACAGCAAAAGTGATTGAAGAAGTCTCAAAAGCGAAAGCTGCTGGATCTGATATTGTTAGCATAAAGAATGGTATTCTCAAGGCTAAGGAAGCGGTTCTTACAGCGCTTATGTCTATG…
KJ832460	Capreolus capreolus	France	2	ATGTCAAATACGGTAGTCACGGGTGAGGTATTAGATAAGTCTATTAGGGAGGTAGTACGCATCCTAGAAGATGCAGTTGGTTGTACTGCTGGTCCTAAAGGCCTCACTGTAGCGATTAGTAAGCCTTATGGGTCGCCAGAGATCACAAAGGATGGCTACAAGGTAATGAAGAGTATAAAGCCTGAAGAACCACTGGCTGCCGCTATAGCGAGCATCATTACTCAGAGTGCTTCTCAGTGTAATGATAAGGTGGGAGATGGAACTACTACATGCTCCATACTGACAGCAAAAGTGATTGAAGAAGTCTCAAAAGCGAAAGCTGCTGGATCTGATATTGTTAGCATAAAGAATGGTATTCTCAAGGCTAAGGAAGCGGTTCTTACAGCGCTTATGTCTATG…
KJ832461	Capreolus capreolus	France	2	ATGTCAAATACGGTAGTCACGGGTGAGGTATTAGATAAGTCTATTAGGGAGGTAGTACGCATCCTAGAAGATGCAGTTGGTTGTACTGCTGGTCCTAAAGGCCTCACTGTAGCGATTAGTAAGCCTTATGGGTCGCCAGAGATCACAAAGGATGGCTACAAGGTAATGAAGAGTATAAAGCCTGAAGAACCACTGGCTGCCGCTATAGCGAGCATCATTACTCAGAGTGCTTCTCAGTGTAATGATAAGGTGGGAGATGGAACTACTACATGCTCCATACTGACAGCAAAAGTGATTGAAGAAGTCTCAAAAGCGAAAGCTGCTGGATCTGATATTGTTAGCATAAAGAATGGTATTCTCAAGGCTAAGGAAGCGGTTCTTACAGCGCTTATGTCTATG…
KJ832462	Capreolus capreolus	France	2	ATGTCAAATACGGTAGTCACGGGTGAGGTATTAGATAAGTCTATTAGGGAGGTAGTACGCATCCTAGAAGATGCAGTTGGTTGTACTGCTGGTCCTAAAGGCCTCACTGTAGCGATTAGTAAGCCTTATGGGTCGCCAGAGATCACAAAGGATGGCTACAAGGTAATGAAGAGTATAAAGCCTGAAGAACCACTGGCTGCCGCTATAGCGAGCATCATTACTCAGAGTGCTTCTCAGTGTAATGATAAGGTGGGAGATGGAACTACTACATGCTCCATACTGACAGCAAAAGTGATTGAAGAAGTCTCAAAAGCGAAAGCTGCTGGATCTGATATTGTTAGCATAAAGAATGGTATTCTCAAGGCTAAGGAAGCGGTTCTTACAGCGCTTATGTCTATG…
KJ832463	Capreolus capreolus	France	1	ATGTCAAATACGGTAGTCACGGGTGAGGTATTAGATAAGTCTATTAGGGAGGTAGTACGCATCCTAGAAGATGCAGTTGGTTGTACTGCTGGTCCTAAAGGCCTCACTGTAGCGATTAGTAAGCCTTATGGGTCGCCAGAGATCACAAAGGATGGCTACAAGGTAATGAAGAGTATAAAGCCTGAAGAACCACTGGCTGCCGCTATAGCGAGCATCATTACTCAGAGTGCTTCTCAGTGTAATGATAAGGTGGGAGATGGAACTACTACATGCTCCATACTAACAGCAAAAGTGATTGAAGAAGTCTCAAAAGCGAAAGCTGCTGGATCTGATATTGTTAGCATAAAGAATGGTATTCTCAAGGCTAAGGAAGCGGTTCTCACAGCGCTTATGTCTATG…
KJ832464	Capreolus capreolus	France	1	ATGTCAAATACGGTAGTCACGGGTGAGGTATTAGATAAGTCTATTAGGGAGGTAGTACGCATCCTAGAAGATGCAGTTGGTTGTACTGCTGGTCCTAAAGGCCTCACTGTAGCGATTAGTAAGCCTTATGGGTCGCCAGAGATCACAAAGGATGGCTACAAGGTAATGAAGAGTATAAAGCCTGAAGAACCACTGGCTGCCGCTATAGCGAGCATCATTACTCAGAGTGCTTCTCAGTGTAATGATAAGGTGGGAGATGGAACTACTACATGCTCCATACTAACAGCAAAAGTGATTGAAGAAGTCTCAAAAGCGAAAGCTGCTGGATCTGATATTGTTAGCATAAAGAATGGTATTCTCAAGGCTAAGGAAGCGGTTCTCACAGCGCTTATGTCTATG…
KJ832468	Capreolus capreolus	France	1	ATGTCAAATACGGTAGTCACGGGTGAGGTATTAGATAAGTCTATTAGGGAGGTAGTACGCATCCTAGAAGATGCAGTTGGTTGTACTGCTGGTCCTAAAGGCCTCACTGTAGCGATTAGTAAGCCTTATGGGTCGCCAGAGATCACAAAGGATGGCTACAAGGTAATGAAGAGTATAAAGCCTGAAGAACCACTGGCTGCCGCTATAGCGAGCATCATTACTCAGAGTGCTTCTCAGTGTAATGATAAGGTGGGAGATGGAACTACTACATGCTCCATACTAACAGCAAAAGTGATTGAAGAAGTCTCAAAAGCGAAAGCTGCTGGATCTGATATTGTTAGCATAAAGAATGGTATTCTCAAGGCTAAGGAAGCGGTTCTCACAGCGCTTATGTCTATG…
KJ832469	Equus caballus	France	1	ATGTCAAATACGGTAGTCACGGGTGAGGTATTAGATAAGTCTATTAGGGAGGTAGTACGCATCCTAGAAGATGCAGTTGGTTGTACTGCTGGTCCTAAAGGCCTCACTGTAGCGATTAGTAAGCCTTATGGGTCGCCAGAGATCACAAAGGATGGCTACAAGGTAATGAAGAGTATAAAGCCTGAAGAACCACTGGCTGCCGCTATAGCGAGCATCATTACTCAGAGTGCTTCTCAGTGTAATGATAAGGTGGGAGATGGAACTACTACATGCTCCATACTAACAGCAAAAGTGATTGAAGAAGTCTCAAAAGCGAAAGCTGCTGGATCTGATATTGTTAGCATAAAGAATGGTATTCTCAAGGCTAAGGAAGCGGTTCTTACAGCGCTTATGTCTATG…
KJ832470	Equus caballus	France	1	ATGTCAAATACGGTAGTCACGGGTGAGGTATTAGATAAGTCTATTAGGGAGGTAGTACGCATCCTAGAAGATGCAGTTGGTTGTACTGCTGGTCCTAAAGGCCTCACTGTAGCGATTAGTAAGCCTTATGGGTCGCCAGAGATCACAAAGGATGGCTACAAGGTAATGAAGAGTATAAAGCCTGAAGAACCACTGGCTGCCGCTATAGCGAGCATCATTACTCAGAGTGCTTCTCAGTGTAATGATAAGGTGGGAGATGGAACTACTACATGCTCCATACTAACAGCAAAAGTGATTGAAGAAGTCTCAAAAGCGAAAGCTGCTGGATCTGATATTGTTAGCATAAAGAATGGTATTCTCAAGGCTAAGGAAGCGGTTCTCACAGCGCTTATGTCTATG…
KJ832471	Equus caballus	France	1	ATGTCAAATACGGTAGTCACGGGTGAGGTATTAGATAAGTCTATTAGGGAGGTAGTACGCATCCTAGAAGATGCAGTTGGTTGTACTGCTGGTCCTAAAGGCCTCACTGTAGCGATTAGTAAGCCTTATGGGTCGCCAGAGATCACAAAGGATGGCTACAAGGTAATGAAGAGTATAAAGCCTGAAGAACCACTGGCTGCCGCTATAGCGAGCATCATTACTCAGAGTGCTTCTCAGTGTAATGATAAGGTGGGAGATGGAACTACTACATGCTCCATACTAACAGCAAAAGTGATTGAAGAAGTCTCAAAAGCGAAAGCTGCTGGATCTGATATTGTTAGCATAAAGAATGGTATTCTCAAGGCTAAGGAAGCGGTTCTCACAGCGCTTATGTCTATG…
KJ832473	Bos taurus	France	1	ATGTCAAATACGGTAGTCACGGGTGAGGTATTAGATAAGTCTATTAGGGAGGTAGTACGCATCCTAGAAGATGCAGTTGGTTGTACTGCTGGTCCTAAAGGCCTCACTGTAGCGATTAGTAAGCCTTATGGGTCGCCAGAGATCACAAAGGATGGCTACAAGGTAATGAAGAGTATAAAGCCTGAAGAACCACTGGCTGCCGCTATAGCGAGCATCATTACTCAGAGTGCTTCTCAGTGTAATGATAAGGTGGGAGATGGAACTACTACATGCTCCATACTAACAGCAAAAGTGATTGAAGAAGTCTCAAAAGCGAAAGCTGCTGGATCTGATATTGTTAGCATAAAGAATGGTATTCTCAAGGCTAAGGAAGCGGTTCTTACAGCGCTTATGTCTATG…
KJ832474	Bos taurus	France	1	ATGTCAAATACGGTAGTCACGGGTGAGGTATTAGATAAGTCTATTAGGGAGGTAGTACGCATCCTAGAAGATGCAGTTGGTTGTACTGCTGGTCCTAAAGGCCTCACTGTAGCGATTAGTAAGCCTTATGGGTCGCCAGAGATCACAAAGGATGGCTACAAGGTAATGAAGAGTATAAAGCCTGAAGAACCACTGGCTGCCGCTATAGCGAGCATCATTACTCAGAGTGCTTCTCAGTGTAATGATAAGGTGGGAGATGGAACTACTACATGCTCCATACTAACAGCAAAAGTGATTGAAGAAGTCTCAAAAGCGAAAGCTGCTGGATCTGATATTGTTAGCATAAAGAATGGTATTCTCAAGGCTAAGGAAGCGGTTCTTACAGCGCTTATGTCTATG…
KJ832475	Bos taurus	France	1	ATGTCAAATACGGTAGTCACGGGTGAGGTATTAGATAAGTCTATTAGGGAGGTAGTACGCATCCTAGAAGATGCAGTTGGTTGTACTGCTGGTCCTAAAGGCCTCACTGTAGCGATTAGTAAGCCTTATGGGTCGCCAGAGATCACAAAGGATGGCTACAAGGTAATGAAGAGTATAAAGCCTGAAGAACCACTGGCTGCCGCTATAGCGAGCATCATTACTCAGAGTGCTTCTCAGTGTAATGATAAGGTGGGAGATGGAACTACTACATGCTCCATACTAACAGCAAAAGTGATTGAAGAAGTCTCAAAAGCGAAAGCTGCTGGATCTGATATTGTTAGCATAAAGAATGGTATTCTCAAGGCTAAGGAAGCGGTTCTTACAGCGCTTATGTCTATG…
KJ832476	Bos taurus	France	1	ATGTCAAATACGGTAGTCACGGGTGAGGTATTAGATAAGTCTATTAGGGAGGTAGTACGCATCCTAGAAGATGCAGTTGGTTGTACTGCTGGTCCTAAAGGCCTCACTGTAGCGATTAGTAAGCCTTATGGGTCGCCAGAGATCACAAAGGATGGCTACAAGGTAATGAAGAGTATAAAGCCTGAAGAACCACTGGCTGCCGCTATAGCGAGCATCATTACTCAGAGTGCTTCTCAGTGTAATGATAAGGTGGGAGATGGAACTACTACATGCTCCATACTAACAGCAAAAGTGATTGAAGAAGTCTCAAAAGCGAAAGCTGCTGGATCTGATATTGTTAGCATAAAGAATGGTATTCTCAAGGCTAAGGAAGCGGTTCTTACAGCGCTTATGTCTATG…
KJ832478	Bos taurus	France	1	ATGTCAAATACGGTAGTCACGGGTGAGGTATTAGATAAGTCTATTAGGGAGGTAGTACGCATCCTAGAAGATGCAGTTGGTTGTACTGCTGGTCCTAAAGGCCTCACTGTAGCGATTAGTAAGCCTTATGGGTCGCCAGAGATCACAAAGGATGGCTACAAGGTAATGAAGAGTATAAAGCCTGAAGAACCACTGGCTGCCGCTATAGCGAGCATCATTACTCAGAGTGCTTCTCAGTGTAATGATAAGGTGGGAGATGGAACTACTACATGCTCCATACTAACAGCAAAAGTGATTGAAGAAGTCTCAAAAGCGAAAGCTGCTGGATCTGATATTGTTAGCATAAAGAATGGTATTCTCAAGGCTAAGGAAGCGGTTCTCACAGCGCTTATGTCTATG…
KJ832480	Bos taurus	France	1	ATGTCAAATACGGTAGTCACGGGTGAGGTATTAGATAAGTCTATTAGGGAGGTAGTACGCATCCTAGAAGATGCAGTTGGTTGTACTGCTGGTCCTAAAGGCCTCACTGTAGCGATTAGTAAGCCTTATGGGTCGCCAGAGATCACAAAGGATGGCTACAAGGTAATGAAGAGTATAAAGCCTGAAGAACCACTGGCTGCCGCTATAGCGAGCATCATTACTCAGAGTGCTTCTCAGTGTAATGATAAGGTGGGAGATGGAACTACTACATGCTCCATACTAACAGCAAAAGTGATTGAAGAAGTCTCAAAAGCGAAAGCTGCTGGATCTGATATTGTTAGCATAAAGAATGGTATTCTCAAGGCTAAGGAAGCGGTTCTCACAGCGCTTATGTCTATG…
KJ832481	Bos taurus	France	1	ATGTCAAATACGGTAGTCACGGGTGAGGTATTAGATAAGTCTATTAGGGAGGTAGTACGCATCCTAGAAGATGCAGTTGGTTGTACTGCTGGTCCTAAAGGCCTCACTGTAGCGATTAGTAAGCCTTATGGGTCGCCAGAGATCACAAAGGATGGCTACAAGGTAATGAAGAGTATAAAGCCTGAAGAACCACTGGCTGCCGCTATAGCGAGCATCATTACTCAGAGTGCTTCTCAGTGTAATGATAAGGTGGGAGATGGAACTACTACATGCTCCATACTAACAGCAAAAGTGATTGAAGAAGTCTCAAAAGCGAAAGCTGCTGGATCTGATATTGTTAGCATAAAGAATGGTATTCTCAAGGCTAAGGAAGCGGTTCTTACAGCGCTTATGTCTATG…
KJ832482	Bos taurus	France	1	ATGTCAAATACGGTAGTCACGGGTGAGGTATTAGATAAGTCTATTAGGGAGGTAGTACGCATCCTAGAAGATGCAGTTGGTTGTACTGCTGGTCCTAAAGGCCTCACTGTAGCGATTAGTAAGCCTTATGGGTCGCCAGAGATCACAAAGGATGGCTACAAGGTAATGAAGAGTATAAAGCCTGAAGAACCACTGGCTGCCGCTATAGCGAGCATCATTACTCAGAGTGCTTCTCAGTGTAATGATAAGGTGGGAGATGGAACTACTACATGCTCCATACTAACAGCAAAAGTGATTGAAGAAGTCTCAAAAGCGAAAGCTGCTGGATCTGATATTGTTAGCATAAAGAATGGTATTCTCAAGGCTAAGGAAGCGGTTCTCACAGCGCTTATGTCTATG…
KJ832483	Bos taurus	France	1	ATGTCAAATACGGTAGTCACGGGTGAGGTATTAGATAAGTCTATTAGGGAGGTAGTACGCATCCTAGAAGATGCAGTTGGTTGTACTGCTGGTCCTAAAGGCCTCACTGTAGCGATTAGTAAGCCTTATGGGTCGCCAGAGATCACAAAGGATGGCTACAAGGTAATGAAGAGTATAAAGCCTGAAGAACCACTGGCTGCCGCTATAGCGAGCATCATTACTCAGAGTGCTTCTCAGTGTAATGATAAGGTGGGAGATGGAACTACTACATGCTCCATACTAACAGCAAAAGTGATTGAAGAAGTCTCAAAAGCGAAAGCTGCTGGATCTGATATTGTTAGCATAAAGAATGGTATTCTCAAGGCTAAGGAAGCGGTTCTCACAGCGCTTATGTCTATG…
KJ832484	Bos taurus	France	1	ATGTCAAATACGGTAGTCACGGGTGAGGTATTAGATAAGTCTATTAGGGAGGTAGTACGCATCCTAGAAGATGCAGTTGGTTGTACTGCTGGTCCTAAAGGCCTCACTGTAGCGATTAGTAAGCCTTATGGGTCGCCAGAGATCACAAAGGATGGCTACAAGGTAATGAAGAGTATAAAGCCTGAAGAACCACTGGCTGCCGCTATAGCGAGCATCATTACTCAGAGTGCTTCTCAGTGTAATGATAAGGTGGGAGATGGAACTACTACATGCTCCATACTAACAGCAAAAGTGATTGAAGAAGTCTCAAAAGCGAAAGCTGCTGGATCTGATATTGTTAGCATAAAGAATGGTATTCTCAAGGCTAAGGAAGCGGTTCTTACAGCGCTTATGTCTATG…
KJ832485	Bos taurus	France	1	ATGTCAAATACGGTAGTCACGGGTGAGGTATTAGATAAGTCTATTAGGGAGGTAGTACGCATCCTAGAAGATGCAGTTGGTTGTACTGCTGGTCCTAAAGGCCTCACTGTAGCGATTAGTAAGCCTTATGGGTCGCCAGAGATCACAAAGGATGGCTACAAGGTAATGAAGAGTATAAAGCCTGAAGAACCACTGGCTGCCGCTATAGCGAGCATCATTACTCAGAGTGCTTCTCAGTGTAATGATAAGGTGGGAGATGGAACTACTACATGCTCCATACTAACAGCAAAAGTGATTGAAGAAGTCTCAAAAGCGAAAGCTGCTGGATCTGATATTGTTAGCATAAAGAATGGTATTCTCAAGGCTAAGGAAGCGGTTCTCACAGCGCTTATGTCTATG…
KJ832487	Bos taurus	France	1	ATGTCAAATACGGTAGTCACGGGTGAGGTATTAGATAAGTCTATTAGGGAGGTAGTACGCATCCTAGAAGATGCAGTTGGTTGTACTGCTGGTCCTAAAGGCCTCACTGTAGCGATTAGTAAGCCTTATGGGTCGCCAGAGATCACAAAGGATGGCTACAAGGTAATGAAGAGTATAAAGCCTGAAGAACCACTGGCTGCCGCTATAGCGAGCATCATTACTCAGAGTGCTTCTCAGTGTAATGATAAGGTGGGAGATGGAACTACTACATGCTCCATACTAACAGCAAAAGTGATTGAAGAAGTCTCAAAAGCGAAAGCTGCTGGATCTGATATTGTTAGCATAAAGAATGGTATTCTCAAGGCTAAGGAAGCGGTTCTCACAGCGCTTATGTCTATG…
KM215253	Capreolus capreolus	Slovenia	2	TTATGCTACGGTTGTTTGTTCTATTGGTCTAAAGTTTAGGAGGTTCAAAAATGTCAAATACGGTAGTCACGGGTGAGGTATTAGATAAGTCTATTAGGGAGGTAGTACGCATCCTAGAAGATGCAGTTGGTTGTACTGCTGGTCCTAAAGGCCTCACTGTAGCGATTAGTAAGCCTTATGGGTCGCCAGAGATCACAAAGGATGGCTACAAGGTAATGAAGAGTATAAAGCCTGAAGAACCACTGGCTGCCGCTATAGCGAGCATCATTACTCAGAGTGCTTCTCAGTGTAATGATAAGGTGGGAGATGGAACTACTACATGCTCCATACTGACAGCAAAAGTGATTGAAGAAGTCTCAAAAGCGAAAGCTGCTGGATCTGATATTGTTAGCATAAAGA…
KM215254	Capreolus capreolus	Slovenia	2	TTATGCTACGGTTGTTTGTTCTATTGGTCTAAAGTTTAGGAGGTTCAAAAATGTCAAATACGGTAGTCACGGGTGAGGTATTAGATAAGTCTATTAGGGAGGTAGTACGCATCCTAGAAGATGCAGTTGGTTGTACTGCTGGTCCTAAAGGCCTCACTGTAGCGATTAGTAAGCCTTATGGGTCGCCAGAGATCACAAAGGATGGCTACAAGGTAATGAAGAGTATAAAGCCTGAAGAACCACTGGCTGCCGCTATAGCGAGCATCATTACTCAGAGTGCTTCTCAGTGTAATGATAAGGTGGGAGATGGAACTACTACATGCTCCATACTGACAGCAAAAGTGATTGAAGAAGTCTCAAAAGCGAAAGCTGCTGGATCTGATATTGTTAGCATAAAGA…
KM215256	Capreolus capreolus	Slovenia	2	TTATGCTACGGTTGTTTGTTCTATTGGTCTAAAGTTTAGGAGGTTCAAAAATGTCAAATACGGTAGTCACGGGTGAGGTATTAGATAAGTCTATTAGGGAGGTAGTACGCATCCTAGAAGATGCAGTTGGTTGTACTGCTGGTCCTAAAGGCCTCACTGTAGCGATTAGTAAGCCTTATGGGTCGCCAGAGATCACAAAGGATGGCTACAAGGTAATGAAGAGTATAAAGCCTGAAGAACCACTGGCTGCCGCTATAGCGAGCATCATTACTCAGAGTGCTTCTCAGTGTAATGATAAGGTGGGAGATGGAACTACTACATGCTCCATACTGACAGCAAAAGTGATTGAAGAAGTCTCAAAAGCGAAAGCTGCTGGATCTGATATTGTTAGCATAAAGA…
KM215257	Capreolus capreolus	Slovenia	2	TTATGCTACGGTTGTTTGTTCTATTGGTCTAAAGTTTAGGAGGTTCAAAAATGTCAAATACGGTAGTCACGGGTGAGGTATTAGATAAGTCTATTAGGGAGGTAGTACGCATCCTAGAAGATGCAGTTGGTTGTACTGCTGGTCCTAAAGGCCTCACTGTAGCGATTAGTAAGCCTTATGGGTCGCCAGAGATCACAAAGGATGGCTACAAGGTAATGAAGAGTATAAAGCCTGAAGAACCACTGGCTGCCGCTATAGCGAGCATCATTACTCAGAGTGCTTCTCAGTGTAATGATAAGGTGGGAGATGGAACTACTACATGCTCCATACTGACAGCAAAAGTGATTGAAGAAGTCTCAAAAGCGAAAGCTGCTGGATCTGATATTGTTAGCATAAAGA…
KM215258	Capreolus capreolus	Slovenia	2	TTATGCTACGGTTGTTTGTTCTATTGGTCTAAAGTTTAGGAGGTTCAAAAATGTCAAATACGGTAGTCACGGGTGAGGTATTAGATAAGTCTATTAGGGAGGTAGTACGCATCCTAGAAGATGCAGTTGGTTGTACTGCTGGTCCTAAAGGCCTCACTGTAGCGATTAGTAAGCCTTATGGGTCGCCAGAGATCACAAAGGATGGCTACAAGGTAATGAAGAGTATAAAGCCTGAAGAACCACTGGCTGCCGCTATAGCGAGCATCATTACTCAGAGTGCTTCTCAGTGTAATGATAAGGTGGGAGATGGAACTACTACATGCTCCATACTGACAGCAAAAGTGATTGAAGAAGTCTCAAAAGCGAAAGCTGCTGGATCTGATATTGTTAGCATAAAGA…
KM215259	Capreolus capreolus	Slovenia	2	TTATGCTACGGTTGTTTGTTCTATTGGTCTAAAGTTTAGGAGGTTCAAAAATGTCAAATACGGTAGTCACGGGTGAGGTATTAGATAAGTCTATTAGGGAGGTAGTACGCATCCTAGAAGATGCAGTTGGTTGTACTGCTGGTCCTAAAGGCCTCACTGTAGCGATTAGTAAGCCTTATGGGTCGCCAGAGATCACAAAGGATGGCTACAAGGTAATGAAGAGTATAAAGCCTGAAGAACCACTGGCTGCCGCTATAGCGAGCATCATTACTCAGAGTGCTTCTCAGTGTAATGATAAGGTGGGAGATGGAACTACTACATGCTCCATACTGACAGCAAAAGTGATTGAAGAAGTCTCAAAAGCGAAAGCTGCTGGATCTGATATTGTTAGCATAAAGA…
KM215260	Capreolus capreolus	Slovenia	2	TTATGCTACGGTTGTTTGTTCTATTGGTCTAAAGTTTAGGAGGTTCAAAAATGTCGAATACGGTAGTCACGGGTGAGGTATTAGATAAGTCTATTAGGGAGGTAGTACGCATCCTAGAAGATGCAGTTGGTTGTACTGCTGGTCCTAAAGGCCTCACTGTAGCGATTAGTAAGCCTTATGGGTCGCCAGAGATCACAAAGGATGGCTACAAGGTAATGAAGAGTATAAAGCCTGAAGAACCACTGGCTGCCGCTATAGCGAGCATCATTACTCAGAGTGCTTCTCAGTGTAATGATAAGGTGGGAGATGGAACTACTACATGCTCCATACTGACAGCAAAAGTGATTGAAGAAGTCTCAAAAGCGAAAGCTGCTGGATCTGATATTGTTAGCATAAAGA…
KM215261	Cervus elaphus	Slovenia	1	TTATGCTACGGTTGTTTGTTCTATTGGTCTAAAGTTTAGGAGGTTCAAAAATGTCAAATACGGTAGTCACGGGTGAGGTATTAGATAAGTCTATTAGGGAGGTAGTACGCATCCTAGAAGATGCAGTTGGTTGTACTGCTGGTCCTAAAGGCCTCACTGTAGCGATTAGTAAGCCTTATGGGTCGCCAGAGATCACAAAGGATGGCTACAAGGTAATGAAGAGTATAAAGCCTGAAGAACCACTGGCTGCCGCTATAGCGAGCATCATTACTCAGAGTGCTTCTCAGTGTAATGATAAGGTGGGAGATGGAACTACTACATGCTCCATACTAACAGCAAAAGTGATTGAAGAAGTCTCAAAAGCGAAAGCTGCTGGATCTGATATTGTTAGCATAAAGA…
KM215262	Cervus elaphus	Slovenia	1	TTATGCTACGGTTGTTTGTTCTATTGGTCTAAAGTTTAGGAGGTTCAAAAATGTCAAATACGGTAGTCACGGGTGAGGTATTAGATAAGTCTATTAGGGAGGTAGTACGCATCCTAGAAGATGCAGTTGGTTGTACTGCTGGTCCTAAAGGCCTCACTGTAGCGATTAGTAAGCCTTATGGGTCGCCAGAGATCACAAAGGATGGCTACAAGGTAATGAAGAGTATAAAGCCTGAAGAACCACTGGCTGCCGCTATAGCGAGCATCATTACTCAGAGTGCTTCTCAGTGTAATGATAAGGTGGGAGATGGAACTACTACATGCTCCATACTAACAGCAAAAGTGATTGAAGAAGTCTCAAAAGCGAAAGCTGCTGGATCTGATATTGTTAGCATAAAGA…
KM215263	Rupicapra rupicapra	Slovenia	1	TTATGCTACGGTTGTTTGTTCTATTGGTCTAAAGTTTAGGAGGTTCAAAAATGTCAAATACGGTAGTCACGGGTGAGGTATTAGATAAGTCTATTAGGGAGGTAGTACGCATCCTAGAAGATGCAGTTGGTTGTACTGCTGGTCCTAAAGGCCTCACTGTAGCGATTAGTAAGCCTTATGGGTCGCCAGAGATCACAAAGGATGGCTACAAGGTAATGAAGAGTATAAAGCCTGAAGAACCACTGGCTGCCGCTATAGCGAGCATCATTACTCAGAGTGCTTCTCAGTGTAATGATAAGGTGGGAGATGGAACTACTACATGCTCCATACTAACAGCAAAAGTGATTGAAGAAGTCTCAAAAGCGAAAGCTGCTGGATCTGATATTGTTAGCATAAAGA…
KM215264	Rupicapra rupicapra	Slovenia	1	TTATGCTACGGTTGTTTGTTCTATTGGTCTAAAGTTTAGGAGGTTCAAAAATGTCAAATACGGTAGTCACGGGTGAGGTATTAGATAAGTCTATTAGGGAGGTAGTACGCATCCTAGAAGATGCAGTTGGTTGTACTGCTGGTCCTAAAGGCCTCACTGTAGCGATTAGTAAGCCTTATGGGTCGCCAGAGATCACAAAGGATGGCTACAAGGTAATGAAGAGTATAAAGCCTGAAGAACCACTGGCTGCCGCTATAGCGAGCATCATTACTCAGAGTGCTTCTCAGTGTAATGATAAGGTGGGAGATGGAACTACTACATGCTCCATACTAACAGCAAAAGTGATTGAAGAAGTCTCAAAAGCGAAAGCTGCTGGATCTGATATTGTTAGCATAAAGA…
KM215265	Rupicapra rupicapra	Slovenia	1	TTATGCTACGGTTGTTTGTTCTATTGGTCTAAAGTTTAGGAGGTTCAAAAATGTCAAATACGGTAGTCACGGGTGAGGTATTAGATAAGTCTATTAGGGAGGTAGTACGCATCCTAGAAGATGCAGTTGGTTGTACTGCTGGTCCTAAAGGCCTCACTGTAGCGATTAGTAAGCCTTATGGGTCGCCAGAGATCACAAAGGATGGCTACAAGGTAATGAAGAGTATAAAGCCTGAAGAACCACTGGCTGCCGCTATAGCGAGCATCATTACTCAGAGTGCTTCTCAGTGTAATGATAAGGTGGGAGATGGAACTACTACATGCTCCATACTAACAGCAAAAGTGATTGAAGAAGTCTCAAAAGCGAAAGCTGCTGGATCTGATATTGTTAGCATAAAGA…
KM215266	Rupicapra rupicapra	Slovenia	1	TTATGCTACGGTTGTTTGTTCTATTGGTCTAAAGTTTAGGAGGTTCAAAAATGTCAAATACGGTAGCCACGGGTGAGGTATTAGATAAGTCTATTAGGGAGGTAGTACGCATCCTAGAAGATGCAGTTGGTTGTACTGCTGGTCCTAAAGGCCTCACTGTAGCGATTAGTAAGCCTTATGGGTCGCCAGAGATCACAAAGGATGGCTACAAGGTAATGAAGAGTATAAAGCCTGAAGAACCACTGGCTGCCGCTATAGCGAGCATCATTACTCAGAGTGCTTCTCAGTGTAATGATAAGGTGGGAGATGGAACTACTACATGCTCCATACTAACAGCAAAAGTGATTGAAGAAGTCTCAAAAGCGAAAGCTGCTGGATCTGATATTGTTAGCATAAAGA…
KR092132	Sus scrofa	Slovakia	1	TGTCAAATACGGTAGTCACGGGTGAGGTATTAGATAAGTCTATTAGGGAAGTAGTACGCATCCTAGAAGATGCAGTTGGTTGTACTGCTGGTCCTAAAGGCCTCACTGTAGCGATTAGTAAGCCTTATGGGTCGCCAGAGATCACAAAGGATGGCTACAAGGTAATGAAGAGTATAAAGCCTGAAGAACCACTGGCTGCCGCTATAGCGAGCATCATTACTCAGAGTGCTTCTCAGTGTAATGATAAGGTGGGAGATGGAACTACTACATGCTCCATACTAACAGCAAAAGTGATTGAAGAAGTCTCAAAAGCGAAAGCTGCTGGATCTGATATTGTTAGCATAAAGAATGGTATTCTCAAGGCTAAGGAAGCGGTTCTTACAGCGCTTATGTCTATGA…
KT192430	Apodemus agrarius	South Korea	2	AGTGGGCTGGTAGTGAATTAGAGTTCGACGGTAAGAAGTTCATAGTGATGAAGGAGAGTGACATAATAGCTAAGGAAGCATAGTCTTATGCTACGGTTGTTTGTTCTATTGGTCTAAAGTTTAGGAGGTTCAAAAATGTCAAATACGGTAGTCACGGGTGAGGTATTAGATAAGTCTATTAGGGAGGTAGTACGCATCCTAGAAGATGCAGTTGGTTGTACTGCTGGTCCTAAGGGCCTCACTGTAGCGATTAGTAAGCCTTATGGGTCACCAGAGATCACAAAGGATGGCTACAAGGTAATGAAGAGTATAAAGCCTGAAGAACCACTGGCTGCCGCTATAGCGAGCATCATTACTCAGAGTGCTTCTCAGTGTAATGATAAGGTGGGAGGTGGAACT…
KT220191	Apodemus agrarius	South Korea	2	AGTGGGCTGGTAGTGAATTAGAGTTCGACGGTAAGAAGTTCATAGTGATGAAGGAGAGTGACATAATAGCTAAGGAAGCATAGTCTTATGCTACGGTTGTTTGTTCTATTGGTCTAAAGTTTAGGAGGTTCAAAAATGTCAAATACGGTAGTCACGGGTGAGGTATTAGATAAGTCTATTAGGGAGGTAGTACGCATCCTAGAAGATGCAGTTGGTTGTACTGCTGGTCCTAAGGGCCTCACTGTAGCGATTAGTAAGCCTTATGGGTCACCAGAGATCACAAAGGATGGCTACAAGGTAATGAAGAGTATAAAGCCTGAAGAACCACTGGCTGCCGCTATAGCGAGCATCATTACTCAGAGTGCTTCTCAGTGTAATGATAAGGTGGGAGATGGAACT…
KT220192	Apodemus agrarius	South Korea	2	AGTGGGCTGGTAGTGAATTAGAGTTCGACGGTAAGAAGTTCATAGTGATGAAGGAGAGTGACATAATAGCTAAGGAAGCATAGTCTTATGCTACGGTTGTTTGTTCTATTGGTCTAAAGTTTAGGAGGTTCAAAAATGTCAAATACGGTAGTCACGGGTGAGGTATTAGATAAGTCTATTAGGGAGGTAGTACGCATCCTAGAAGATGCAGTTGGTTGTACTGCTGGTCCTAAGGGCCTCACTGTAGCGATTAGTAAGCCTTATGGGTCACCAGAGATCACAAAGGATGGCTACAAGGTAATGAAGAGTATAAAGCCTGAAGAACCACTGGCTGCCGCTATAGCGAGCATCATTACTCAGAGTGCTTCTCAGTGTAATGATAAGGTGGGAGATGGAACT…
KT220193	Apodemus agrarius	South Korea	2	AGTGGGCTGGTAGTGAATTAGAGTTCGACGGTAAGAAGTTCATAGTGATGAAGGAGAGTGACATAATAGCTAAGGAAGCATAGTCTTATGCTACGGTTGTTTGTTCTATTGGTCTAAAGTTTAGGAGGTTCAAAAATGTCAAATACGGTAGTCACGGGTGAGGTATTAGATAAGTCTATTAGGGAGGTAGTACGCATCCTAGAAGATGCAGTTGGTTGTACTGCTGGTCCTAAGGGCCTCACTGTAGCGATTAGTAAGCCTTATGGGTCACCAGAGATCACAAAGGATGGCTACAAGGTAATGAAGAGTATAAAGCCTGAAGAACCACTGGCTGCCGCTATAGCGAGCATCATTACTCAGAGTGCTTCTCAGTGTAATGATAAGGTGGGAGATGGAACT…
KT970678	Canis familiaris	Italy	1	CGGATATCTTTCGCCTTACTTTGTTACAAATGCTGAAAAAATGCTGGTGGAATTTGAAAATCCATACATATTTCTTACTGAAAAGAAGATTAATCTTGTACAAAGCATTCTACCAATCTTAGAAAACGTTGCACGGTCTGGAAGACCATTGCTCATCATGGCTGAAGACGTTGAAGGTGAAGCTCTGAGCACGCTTGTACTCAATAAGCTCCGTGGTGGCCTTCAAGTTGCTGCTGTAAAGGCGCCTGGTTTCGGTGACAGGAGAAAAGACATGCTTGGCGATATTGCTGTAATAGTAGGCGCTAAGTATGTAGTAAATGACGAGCTTGCTGTTAAGATGGAAGACATCGCTCTAAGCGATCTTGGTACTGCTAAGAGCGTACGCATCACAAAAGACGC…
KT970679	Canis familiaris	Italy	1	CGGGTATCTTTCGCCTTACTTTGTTACAAATGCTGAAAAAATGCTGGTGGAATTTGAAAATCCATACATATTTCTTACTGAAAAGAAGATTAATCTTGTACAAAGCATTCTACCAATCTTAGAAAACGTTGCACGGTCTGGAAGACCATTGCTCATCATAGCTGAAGACGTTGAAGGTGAAGCTCTGAGCACGCTTGTACTCAATGAGCTCCGTGGTGGCCTTCAAGTTGCTGCTGTAAAGGCGCCTGGTTTCGGTGACAGGAGAAAAGACATGCTTGGCGATATTGCTGTAATAGTAGGCGCTAAGTATGTAGTAAATGACGAGCTTGCTGTTAAGATGGAAGACATCGCTCTAAGCGATCTTGGTACTGCTAAGAGCGTACGCATCACAAAAGACGC…
KT970680	Canis familiaris	Italy	1	CGGATATCTTTCGCCTTACTTTGTTACAAATGCTGAAAAAATGCTGGTGGAATTTGAAAATCCATACATATTTCTTACTGAAAAGAAGATTAATCTTGTACAAAGCATTCTACCAATCTTAGAAAACGTTGCACGGTCTGGAAGACCATTGCTCATCATAGCTGAAGACGTTGAAGGTGAAGCTCTGAGCACGCTTGTACTCAATAAGCTCCGTGGTGGCCTTCAAGTTGCTGCTGTAAAGGCGCCTGGTTTCGGTGACAGGAGAAAAGACATGCTTGGCGATATTGCTGTAATAGTAGGCGCTAAGTATGTAGTAAATGACGAGCTTGCTGTTAAGATGGAAGACATCGCTCTAAGCGATCTTGGTACTGCTAAGAGCGTACGCATCACAAAAGACGC…
KU519284	Felis catus	South Korea	2	AGTACGCATCCTAGAAGATGCAGTTGGTTGTACTGCTGGTCCTAAGGGCCTCACTGTAGCGATTAGTAAGCCTTATGGGTCACCAGAGATCACAAAGGATGGCTACAAGGTAATGAAGAGTATAAAGCCTGAAGAACCACTGGCTGCCGCTATAGCGAGCATCATTACTCAGAGTGCTTCTCAGTGTAATGATAAGGTGGGAGATGGAACTACTACATGCTCCATACTGACAGCAAAAGTGATTGAAGAAGTCTCAAAAGCGAAAGCTGCTGGATCTGATATTGTTAGCATAAAGAATGGTATTCTCAAGGCTAAGGAAGCGGTTCTTACAGCGCTGATGTCTATGAGACGTGAAGTAGAAGAAGACGAAATTGCACAAGTTGCAACATTGTCTGCAAA…
KU519285	Felis catus	South Korea	2	AGTACGCATCCTAGAAGATGCAGTTGGTTGTACTGCTGGTCCTAAGGGCCTCACTGTAGCGATTAGTAAGCCTTATGGGTCACCAGAGATCACAAAGGATGGCTACAAGGTAATGAAGAGTATAAAGCCTGAAGAACCACTGGCTGCCGCTATAGCGAGCATCATTACTCAGAGTGCTTCTCAGTGTAATGATAAGGTGGGAGATGGAACTACTACATGCTCCATACTGACAGCAAAAGTGATTGAAGAAGTCTCAAAAGCGAAAGCTGCTGGATCTGATATTGTTAGCATAAAGAATGGTATTCTCAAGGCTAAGGAAGCGGTTCTTACAGCGCTGATGTCTATGAGACGTGAAGTAGAAGAAGACGAAATTGCACAAGTTGCAACATTGTCTGCAAA…
KU519286	Canis familiaris	South Korea	2	GGAGGTAGTACGCATCCTAGAAGATGCAGTTGGTTGTACTGCTGGTCCTAAGGGCCTCACTGTAGCGATTAGTAAGCCTTATGGGTCACCAGAGATCACAAAGGATGGCTACAAGGTAATGAAGAGTATAAAGCCTGAAGAACCACTGGCTGCCGCTATAGCGAGCATCATTACTCAGAGTGCTTCTCAGTGTAATGATAAGGTGGGAGATGGAACTACTACATGCTCCATACTGACAGCAAAAGTGATTGAAGAAGTCTCAAAAGCGAAAGCTGCTGGATCTGATATTGTTAGCATAAAGAATGGTATTCTCAAGGCTAAGGAAGCGGTTCTTACAGCGCTGATGTCTATGAGACGTGAAGTAGAAGAAGACGAAATTGCACAAGTTGCAACATTGTC…
KU712098	Ovis musimon	Germany	1	GGATATCTTTCGCCTTACTTTGTTACAAATGCTGAAAAAATGCTGGTGGAATTTGAAAATCCATACATATTCCTTACTGAAAAGAAGATTAATCTTGTACAAAGCATTCTACCAATCTTAGAAAACGTTGCACGGTCTGGAAGGCCATTGCTCATCATAGCTGAAGACGTTGAAGGTGAAGCTCTTAGCACGCTTGTACTCAATAAGCTCCGTGGTGGCCTTCAAGTTGCTGCTGTAAAGGCGCCTGGTTTTGGTGACAGGAGAAAAGACATGCTTGGCGATATTGCTGTAATAGTAGGCGCTAAGTATGTAGTAAATGACGAGCTTGCTGTTAAGATGGAAGATATCGCTCTAAGCGATCTTGGTACTGCTAAGAGCGTACGCATCACAAAAGACGCA…
KU712104	Ovis musimon	Germany	1	GGATATCTTTCGCCTTACTTTGTTACAAATGCTGAAAAAATGCTGGTGGAATTTGAAAATCCATACATATTCCTTACTGAAAAGAAGATTAATCTTGTACAAAGCATTCTACCAATCTTAGAAAACGTTGCACGGTCTGGAAGACCATTGCTCATCATAGCTGAAGACGTTGAAGGTGAAGCTCTGAGCACGCTTGTACTCAATAAGCTCCGTGGTGGCCTTCAAGTTGCTGCTGTAAAGGCGCCTGGTTTTGGTGACAGGAGAAAAGACATGCTTGGCGATATTGCTGTAATAGTAGGCGCTAAGTATGTAGTAAATGACGAGCTTGCTGTTAAGATGGAAGATATCGCTCTAAGCGATCTTGGTACTGCTAAGAGCGTACGCATCACAAAAGACGCA…
KU712105	Ovis musimon	Germany	1	GGATATCTTTCGCCTTACTTTGTTACAAATGCTGAAAAAATGCTGGTGGAATTTGAAAATCCATACATATTCCTTACTGAAAAGAAGATTAATCTTGTACAAAGCATTCTACCAATCTTAGAAAACGTTGCACGGTCTGGAAGACCATTGCTCATCATAGCTGAAGACGTTGAAGGTGAAGCTCTTAGCACGCTTGTACTCAATAAGCTCCGTGGTGGCCTTCAAGTTGCTGCTGTAAAGGCGCCTGGTTTCGGTGACAGGAGAAAAGACATGCTTGGCGATATTGCTGTAATAGTAGGCGCTAAGTATGTAGTAAATGACGAGCTTGCTGTTAAGATGGAAGATATCGCTCTAAGCGATCTTGGTACTGCTAAGAGCGTACGCATCACAAAAGACGCA…
KU712108	Cervus elaphus	Germany	1	GGATATCTTTCGCCTTACTTTGTTACAAATGCTGAAAAAATGCTGGTGGAATTTGAAAATCCATACATATTCCTTACTGAAAAGAAGATTAATCTTGTACAAAGCATTCTACCAATCTTAGAAAACGTTGCGCGGTCTGGAAGACCATTGCTCATCATAGCTGAAGACGTTGAAGGTGAAGCTCTGAGCACGCTTGTACTCAATAAGCTCCGTGGTGGCCTTCAAGTTGCTGCTGTAAAGGCGCCTGGTTTCGGTGATAGAAGAAAAGACATGCTTGGCGATATTGCTGTAATAGTAGGCGCTAAGTATGTAGTAAATGACGAGCTTGCTGTTAAGATGGAAGATATCGCTCTAAGCGATCTTGGTACTGCTAAGAGCGTACGCATCACAAAAGACGCA…
KU712117	Capreolus capreolus	Germany	2	GGATATCTTTCGCCTTACTTTGTTACAAATGCTGAAAAAATGCTGGTGGAATTTGAAAATCCATACATATTCCTTACTGAAAAGAAGATTAATCTTGTACAAAGCATTTTACCAATATTAGAAAACGTTGCGAGAGCTGGTAGACCATTGCTTATCATAGCTGAAGATGTTGAAGGTGAAGCTCTGAGCACGCTTGTACTCAATAAGCTCCGTGGTGGGCTTCAAGTTGCTGCTGTAAAGGCGCCTGGTTTCGGTGACAGAAGAAAAGACATGCTAGGCGATATTGCCGTAATAGTAGGCGCTAAGTATGTAGTAAATGACGAGCTTGCTGTTAAGATGGAAGATATCGCTCTAAGCGATCTTGGTACTGCTAAGAGCGTGCGCATCACAAAAGACGCA…
KU712123	Capreolus capreolus	Germany	2	GGATATCTTTCGCCTTACTTTGTTACAAATGCTGAAAAAATGCTGGTGGAATTTGAAAATCCATACATATTCCTTACTGAAAAGAAGATTAATCTTGTACAAAGCATTTTACCAATATTAGAAAACGTTGCGAGAGCTGGTAGACCATTGCTCATCATAGCTGAAGATGTTGAAGGTGAAGCTCTGAGCACGCTTGTACTCAATAAGCTCCGTGGTGGCCTTCAAGTTGCTGCTGTAAAGGCGCCTGGTTTCGGTGACAGAAGAAAAGACATGCTAGGCGATATTGCCGTAATAGTAGGCGCTAAGTATGTAGTAAATGACGAGCTTGCTGTTAAGATGGAAGATATCGCTCTAAGCGATCTTGGTACTGCTAAGAGCGTGCGCATCACAAAAGACGCA…
KU712127	Cervus nippon	Germany	1	GGATATCTTTCGCCTTACTTTGTTACAAATGCTGAAAAAATGCTGGTGGAATTTGAAAATCCATACATATTCCTTACTGAAAAGAAGATTAATCTTGTACAAAGCATTCTACCAATCTTAGAAAACGTTGCACGGTCTGGAAGACCATTGCTCATCATAGCTGAAGACGTTGAAGGTGAAGCTCTGAGCACGCTTGTACTCAATAAGCTCCGTGGTGGCCTTCAAGTTGCTGCTGTAAAGGCGCCTGGTTTCGGTGACAGGAGAAAAGACATGCTTGGCGATATTGCTGTAATAGTAGGCGCTAAGTATGTAGTAAATGACGAGCTTGCTGTTAAGATGGAAGACATCGCTCTAAGCGATCTTGGTACTGCTAAGAGCGTACGCATCACAAAAGACGCA…
KU863662	Mazama gouazoupira	Brazil	2	ATGAAGAGTATAAAGCCTGAGGAGCCATTGGCTGCTGCTATAGCCAGTATAATTACCCAAAGCGCATCTCAGTGCAACGATAAGGTAGGTGATGGTACTACCACATGCTCAATACTGACTGCAAAAGTTATTGAGGAAGTATCCCGCGCTAAAGCTGCGGGCTCTGACATTGTTAGCATACGTAACGGTATACTGAAAGCTAAGGAGGCTGTGCTGTCTTCTCTTATGTCTATGAGACGCGAGGTTGAGGAAGACGAAATTGCTCAGGTGGCTACTATTTCTGCAAATGGTGACAAAAACATAGGAAGCAAGATCGCTCAGTGCGTCAAGGAAGTCGGACGAGATGGCGTGATAACCGTTGAGGAAAGCAAGGGATTTAAGGATCTGGAAGTTGAGAAG…
KY379956	Dermacentor reticulatus	Russia	3	TAGTCTTATGCTCCGGTTGTTTGTTCTATTGGTCTAAAGCTTAGGAGGTTCAAAAATGTCAAATACGGTAGTCACGGGTGAGGTGTTAGATAAGTCTATTAGGGAAGTAGTACGCATCCTCGAAGATGCAGTTGGTTGTACTGCTGGTCCTAAAGGCCTCACTGTAGCGATTAGTAAGCCTTATGGGTCGCCAGAGATCACAAAGGATGGCTACAAGGTAATGAAGAGTATAAAGCCTGAAGAGCCACTGGCTGCCGCTATAGCGAGCATCATTACTCAGAGTGCTTCTCAGTGTAATGATAAGGTGGGAGATGGCACTACTACATGCTCCATACTGACAGCTAAGGTGATCGAGGAAGTCTCAAAGGCAAAAGCTGCGGGATCCGATATTGTTAGCAT…
Lamb2_3160513045	Ovis aries	Netherlands	1	ATATTCCTTACTGAAAAGAAGATTAATCTTGTACAAAGCATTCTACCAATCTTAGAAAACGTTGCACGGTCTGGAAGGCCATTGCTCATCATAGCTGAAGACGTTGAAGGTGAAGCTCTTAGCACGCTTGTACTCAATAAGCTCCGTGGTGGCCTTCAAGTTGCTGCTGTAAAGGCGCCTGGTTTTGGTGACAGGAGAAAAGACATGCTTGGCGATATTGCTGTAATAGTAGGCGCTAAGTATGTAGTAAATGACGAGCTTGCTGTTAAGATGGAAGATATCGCTCTAAGCGATCTTGGTACTGCTAAGAGCGTACGCATCACAAAAGACGCAACTACTATCATAGGTAGTGTTGATAGCAGTTCT
LC334016	Canis familiaris	Japan	2	TAGTGATGAAGGAGAGTGACATAATAGCTAAGGAAGCATAGTCTTATGCTACGGTTGTTTGTTCTATTGGTCTAAAGTTTAGGAGGTTCAAAAATGTCAAATACGGTAGTCACGGGTGAGGTATTAGATAAGTCTATTAGGGAGGTAGTACGCATCCTAGAAGATGCAGTTGGTTGTACTGCTGGTCCTAAGGGCCTCACTGTAGCGATTAGTAAGCCTTATGGGTCACCAGAGATCACAAAGGATGGCTACAAGGTAATGAAGAGTATAAAGCCTGAAGAACCACTGGCTGCCGCTATAGCGAGCATCATTACTCAGAGTGCTTCTCAGTGTAATGATAAGGTGGGAGATGGAACTACTACATGCTCCATACTGACAGCAAAAGTGATTGAAGAAGTC…
LTO205	Homo sapiens	Netherlands	1	ATATTTCTTACTGAAAAGAAGATTAATCTTGTACAAAGCATTCTACCAATCTTAGAAAACGTTGCACGGTCTGGAAGACCATTGCTCATCATAGCTGAAGACGTTGAAGGTGAAGCTCTGAGCACGCTTGTACTCAATAAGCTCCGTGGTGGCCTTCAAGTTGCTGCTGTAAAGGCGCCTGGTTTCGGTGACAGGAGAAAAGACATGCTTGGCGATATTGCTGTAATAGTAGGCGCTAAGTATGTAGTAAATGACGAGCTTGCTGTTAAGATGGAAGACATCGCTCTAAGCGATCTTGGTACTGCTAAGAGCGTACGCATCACAAAAGACGCAACTACTATCATAGGTAGTGTTGATAGCAGTTCT
LTO6052	Homo sapiens	Netherlands	1	ATATTCCTTACTGAAAAGAAGATTAATCTTGTACAAAGCATTCTACCAATCTTAGAAAACGTTGCACGGTCTGGAAGACCATTGCTCATCATAGCTGAAGACGTTGAAGGTGAAGCTCTGAGCACGCTTGTACTCAATAAGCTCCGTGGTGGCCTTCAAGTTGCTGCTGTAAAGGCGCCTGGTTTCGGTGACAGGAGAAAAGACATGCTTGGCGATATTGCTGTAATAGTAGGCGCTAAGTATGTAGTAAATGACGAGCTTGCTGTTAAGATGGAAGACATCGCTCTAAGCGATCTTGGTACTGCTAAGAGCGTACGCATCACAAAAGACGCAACTACTATCATAGGTAGTGTTGATAGCAGTTCT
M2Sheepnocode	Ovis aries	Netherlands	1	GGATATCTTTCGCCTTACTTTGTTACAAATGCTGAAAAAATGCTGGTGGAATTTGAAAATCCATACATATTCCTTACTGAAAAGAAGATTAATCTTGTACAAAGCATTCTACCAATCTTAGAAAACGTTGCACGGTCTGGAAGGCCATTGCTCATCATAGCTGAAGACGTTGAAGGTGAAGCTCTTAGCACGCTTGTACTCAATAAGCTCCGTGGTGGCCTTCAAGTTGCTGCTGTAAAGGCGCCTGGTTTTGGTGACAGGAGAAAAGACATGCTTGGCGATATTGCTGTAATAGTAGGCGCTAAGTATGTAGTAAATGACGAGCTTGCTGTTAAGATGGAAGATATCGCTCTAAGCGATCTTGGTACTGCTAAGAGCGTACGCATCACAAAAGACGCA…
MartersBelgietissue187	Mustela putorius	Belgium	1	TGCTGAAAAAATGCTGGTGGAATTTGAAAATCCATACATATTCCTTACTGAAAAGAAGATTAATCTTGTACAAAGCATTCTACCAATCTTAGAAAACGTTGCACGGTCTGGAAGACCATTGCTCATCATAGCTGAAGACGTTGAAGGTGAAGCTCTGAGCACGCTTGTACTCAATAAGCTCCGTGGTGGCCTTCAAGTTGCTGCTGTAAAGGCGCCTGGTTTCGGTGACAGGAGAAAAGACATGCTTGGCGATATTGCTGTAATAGTAGGCGCTAAGTATGTAGTAAATGACGAGCTTGCTGTTAAGATGGAAGACATCGCTCTAAGCGATCTTGGTACTGCTAAGAGCGTACGCATCACAAAAGACGCAACTACTATCATAGGTAGTGTTGATAGCAG…
MF061233	Dama dama	Slovakia	1	GGATATCTTTCGCCTTACTTTGTTACAAATGCTGAAAAAATGCTGGTGGAATTTGAAAATCCATACATATTCCTTACTGAAAAGAAGATTAATCTTGTACAAAGCATTCTACCAATCTTAGAAAACGTTGCACGGTCTGGAAGACCATTGCTCATCATAGCTGAAGACGTTGAAGGTGAAGCTCTGAGCACGCTTGTACTCAATAAGCTCCGTGGTGGCCTTCAAGTTGCTGCTGTAAAGGCGCCTGGTTTTGGTGACAGGCGAAAAGACATGCTTGGCGATATTGCTGTAATAGTAGGCGCTAAGTATGTAGTAAATGACGAGCTTGCTGTTAAGATGGAAGATATCGCTCTAAGCGATCTTGGTACTGCTAAGAGCGTACGCATCACAAAAGACGCA…
MG570466	Homo sapiens	Poland	1	TTATGCTTCGGTTGTTTGTTCTATTGGTCTAAAGTTTAGGAGGTTCAAAAATGTCAAATACGGTAGTCACGGGTGAGGTATTAGATAAGTCTATTAGGGAAGTAGTACGCATCCTAGAAGATGCAGTTGGTTGTACTGCTGGTCCTAAAGGCCTCACTGTAGCGATTAGTAAGCCTTATGGGTCGCCAGAGATCACAAAGGATGGCTACAAGGTAATGAAGAGTATAAAGCCTGAAGAACCACTGGCTGCCGCTATAGCGAGCATCATTACTCAGAGTGCTTCTCAGTGTAATGATAAGGTGGGAGATGGAACTACTACATGCTCCATACTAACAGCAAAAGTGATTGAAGAAGTCTCAAAAGCGAAAGCTGCTGGATCTGATATTGTTAGCATAAAGA…
MG670108	Procyon lotor	Poland	1	ATGTCAAATACGGTAGTCACGGGTGAGGTATTAGATAAGTCTATTAGGGAGGTAGTACGCATCCTAGAAGATGCAGTTGGTTGTACTGCTGGTCCTAAAGGCCTCACTGTAGCGATTAGTAAGCCTTATGGGTCGCCAGAGATCACAAAGGATGGCTACAAGGTAATGAAGAGTATAAAGCCTGAAGAACCACTGGCTGCCGCTATAGCGAGCATCATTACTCAGAGTGCTTCTCAGTGTAATGATAAGGTGGGAGATGGAACTACTACATGCTCCATACTAACAGCAAAAGTGATTGAAGAAGTCTCAAAAGCGAAAGCTGCTGGATCTGATATTGTTAGCATAAAGAATGGTATTCTCAAGGCTAAGGAAGCGGTTCTTACAGCGCTTATGTCTATG…
mice_29	Rodentia	Netherlands	3	GGATATCTTTCGCCTTACTTCGTTACAAATGCTGAAAAGATGCTTGTGGAATTTGAAAATCCATACATATTCCTCACTGAAAAGAAGATTAATCTTGTACAAAGCATTCTACCAATATTAGAAAACGTTGCGAGAGCTGGGAGACCATTGCTCATTATAGCGGAAGACGTTGAAGGTGAAGCTCTGAGTACGCTTGTACTTAATAAGCTCCGTGGTGGGCTTCAAGTTGCTGCTGTAAAGGCACCTGGTTTCGGTGATAGAAGAAAGGACATGCTAGGCGATATTGCTGTAATAGTGGGCGCTAAGTATGTAGTAAATGATGAGCTTGCTGTTAAGATGGAAGATATCGCTCTAAGCGATTTGGGTACTGCTAAGAGCGTTCGCATTACAAAAGACGCG…
miceear	Rodentia	Netherlands	3	GGATATCTTTCGCCTTACTTCGTTACAAATGCTGAAAAGATGCTTGTGGAATTTGAAAATCCATACATATTCCTCACTGAAAAGAAGATTAATCTTGTACAAAGCATTCTACCAATATTAGAAAACGTTGCGAGAGCTGGGAGACCATTGCTCATTATAGCGGAAGACGTTGAAGGTGAAGCTCTGAGTACGCTTGTACTTAATAAGCTCCGTGGTGGGCTTCAAGTTGCTGCTGTAAAGGCACCTGGTTTCGGTGATAGAAGAAAGGACATGCTAGGCGATATTGCTGTAATAGTGGGCGCTAAGTATGTAGTAAATGATGAGCTTGCTGTTAAGATGGAAGATATCGCTCTAAGCGATTTGGGTACTGCTAAGAGCGTTCGCATTACAAAAGACGCG…
MiceEar888	Myodes glareolus	Netherlands	3	GGATATCTTTCGCCTTACTTCGTTACAAATGCTGAAAAGATGCTTGTGGAATTTGAAAATCCATACATATTCCTCACTGAAAAGAAGATTAATCTTGTACAAAGCATTCTACCAATATTAGAAAACGTTGCGAGAGCTGGGAGACCATTGCTCATTATAGCGGAAGACGTTGAAGGTGAAGCTCTGAGTACGCTTGTACTTAATAAGCTCCGTGGTGGGCTTCAAGTTGCTGCTGTAAAGGCACCTGGTTTCGGTGATAGAAGAAAGGACATGCTAGGCGATATTGCTGTAATAGTGGGCGCTAAGTATGTAGTAAATGATGAGCTTGCTGTTAAGATGGAAGATATCGCTCTAAGCGATTTGGGTACTGCTAAGAGCGTTCGCATTACAAAAGACGCG…
moufflon11	Ovis musimon	Netherlands	1	TGATCGCGGATATCTTTCGCCTTACTTTGTTACAAATGCTGAAAAAATGCTGGTGGAATTTGAAAATCCATACATATTCCTTACTGAAAAGAAGATTAATCTTGTACAAAGCATTCTACCAATCTTAGAAAACGTTGCACGGTCTGGAAGACCATTGCTCATCATAGCTGAAGACGTTGAAGGTGAAGCTCTGAGCACGCTTGTACTCAATAAGCTCCGTGGTGGCCTTCAAGTTGCTGCTGTAAAGGCGCCTGGTTTTGGTGACAGGAGAAAAGACATGCTTGGCGATATTGCTGTAATAGTAGGCGCTAAGTATGTAGTAAATGACGAGCTTGCTGTTAAGATGGAAGATATCGCTCTAAGCGATCTTGGTACTGCTAAGAGCGTACGCATCACAAA…
moufflon130	Ovis musimon	Netherlands	1	TCGCGGATATCTTTCGCCTTACTTTGTTACAAATGCTGAAAAAATGCTGGTGGAATTTGAAAATCCATACATATTCCTTACTGAAAAGAAGATTAATCTTGTACAAAGCATTCTACCAATCTTAGAAAACGTTGCACGGTCTGGAAGACCATTGCTCATCATAGCTGAAGACGTTGAAGGTGAAGCTCTGAGCACGCTTGTACTCAATAAGCTCCGTGGTGGCCTTCAAGTTGCTGCTGTAAAGGCGCCTGGTTTCGGTGACAGGAGAAAAGACATGCTTGGCGATATTGCTGTAATAGTAGGCGCTAAGTATGTAGTAAATGACGAGCTTGCTGTTAAGATGGAAGATATCGCTCTAAGCGATCTTGGTACTGCTAAGAGCGTACGCATCACAAAAGA…
moufflon138	Ovis musimon	Netherlands	1	AAAATCCATACATATTCCTTACTGAAAAGAAGATTAATCTTGTACAAAGCATTCTACCAATCTTAGAAAACGTTGCACGGTCTGGAAGACCATTGCTCATCATAGCTGAAGACGTTGAAGGTGAAGCTCTGAGCACGCTTGTACTCAATAAGCTCCGTGGTGGCCTTCAAGTTGCTGCTGTAAAGGCGCCTGGTTTCGGTGACAGGAGAAAAGACATGCTTGGCGATATTGCTGTAATAGTAGGCGCTAAGTATGTAGTAAATGACGAGCTTGCTGTTAAGATGGAAGATATCGCTCTAAGCGATCTTGGTACTGCTAAGAGCGTACGCATCACAAAAGACGCAACTACTATCATAGGTAGTGTTGATAGCAGTTCTGAAAGCATAGCTAGCAGGACTA…
moufflon194	Ovis musimon	Netherlands	1	GTTTGATCGCGGATATCTTTCGCCTTACTTTGTTACAAATGCTGAAAAAATGCTGGTGGAATTTGAAAATCCATACATATTCCTTACTGAAAAGAAGATTAATCTTGTACAAAGCATTCTACCAATCTTAGAAAACGTTGCACGGTCTGGAAGACCATTGCTCATCATAGCTGAAGACGTTGAAGGTGAAGCTCTTAGCACGCTTGTACTCAATAAGCTCCGTGGTGGCCTTCAAGTTGCTGCTGTAAAGGCGCCTGGTTTTGGTGACAGAAGAAAAGACATGCTTGGCGATATTGCTGTAATAGTAGGCGCTAAGTATGTAGTAAATGACGAGCTTGCTGTTAAGATGGAAGATATCGCTCTAAGCGATCTTGGTACTGCTAAGAGCGTACGCATCAC…
moufflon199	Mouflon	Netherlands	1	AAAGAAGATTAATCTTGTACAAAGCATTCTACCAATCTTAGAAAACGTTGCACGGTCTGGAAGACCATTGCTCATCATAGCTGAAGACGTTGAAGGTGAAGCTCTTAGCACGCTTGTACTCAATAAGCTCCGTGGTGGCCTTCAAGTTGCTGCTGTAAAGGCGCCTGGTTTCGGTGACAGGAGAAAAGACATGCTTGGCGATATTGCTGTAATAGTAGGCGCTAAGTATGTAGTAAATGACGAGCTTGCTGTTAAGATGGAAGACATCGCTCTAAGCGATCTTGGTACTGCTAAGAGCGTACGCATCACAAAAGACGCAACTACTATCATAGGTAGTGTTGATAGCAGTTCTGAAAGCATAGCTAGCAGGACTAATCAAATCAAAGCTCAGATAGAAAA…
moufflon200	Ovis musimon	Netherlands	1	CAGTTTGATCGCGGATATCTTTCGCCTTACTTTGTTACAAATGCTGAAAAAATGCTGGTGGAATTTGAAAATCCATACATATTCCTTACTGAAAAGAAGATTAATCTTGTACAAAGCATTCTACCAATCTTAGAAAACGTTGCACGGTCTGGAAGACCATTGCTCATCATAGCTGAAGACGTTGAAGGTGAAGCTCTTAGCACGCTTGTACTCAATAAGCTCCGTGGTGGCCTTCAAGTTGCTGCTGTAAAGGCGCCTGGTTTCGGTGACAGGAGAAAAGACATGCTTGGCGATATTGCTGTAATAGTAGGCGCTAAGTATGTAGTAAATGACGAGCTTGCTGTTAAGATGGAAGACATCGCTCTAAGCGATCTTGGTACTGCTAAGAGCGTACGCATC…
moufflon204	Ovis musimon	Netherlands	1	GATCGCGGATATCTTTCGCCTTACTTTGTTACAAATGCTGAAAAAATGCTGGTGGAATTTGAAAATCCATACATATTCCTTACTGAAAAGAAGATTAATCTTGTACAAAGCATTCTACCAATCTTAGAAAACGTTGCACGGTCTGGAAGACCATTGCTCATCATAGCTGAAGACGTTGAAGGTGAAGCTCTTAGCACGCTTGTACTCAATAAGCTCCGTGGTGGCCTTCAAGTTGCTGCTGTAAAGGCGCCTGGTTTTGGTGACAGGAGAAAAGACATGCTTGGCGATATTGCTGTAATAGTAGGCGCTAAGTATGTAGTAAATGACGAGCTTGCTGTTAAGATGGAAGATATCGCTCTAAGCGATCTTGGTACTGCTAAGAGCGTACGCATCACAAAA…
moufflon205	Ovis musimon	Netherlands	1	GGTATGCAGTTTGATCGCGGATATCTTTCGCCTTACTTTGTTACAAATGCTGAAAAAATGCTGGTGGAATTTGAAAATCCATACATATTCCTTACTGAAAAGAAGATTAATCTTGTACAAAGCATTCTACCAATCTTAGAAAACGTTGCACGGTCTGGAAGACCATTGCTCATCATAGCTGAAGACGTTGAAGGTGAAGCTCTGAGCACGCTTGTACTCAATAAGCTCCGTGGTGGCCTTCAAGTTGCTGCTGTAAAGGCGCCTGGTTTTGGTGACAGGAGAAAAGACATGCTTGGCGATATTGCTGTAATAGTAGGCGCTAAGTATGTAGTAAATGACGAGCTTGCTGTTAAGATGGAAGATATCGCTCTAAGCGATCTTGGTACTGCTAAGAGCGTA…
moufflon206	Ovis musimon	Netherlands	1	CAGTTTGATCGCGGATATCTTTCGCCTTACTTTGTTACAAATGCTGAAAAAATGCTGGTGGAATTTGAAAATCCATACATATTCCTTACTGAAAAGAAGATTAATCTTGTACAAAGCATTCTACCAATCTTAGAAAACGTTGCACGGTCTGGAAGACCATTGCTCATCATAGCTGAAGACGTTGAAGGTGAAGCTCTGAGCACGCTTGTACTCAATAAGCTCCGTGGTGGCCTTCAAGTTGCTGCTGTAAAGGCGCCTGGTTTTGGTGACAGGAGAAAAGACATGCTTGGCGATATTGCTGTAATAGTAGGCGCTAAGTATGTAGTAAATGACGAGCTTGCTGTTAAGATGGAAGATATCGCTCTAAGCGATCTTGGTACTGCTAAGAGCGTACGCATC…
moufflon226	Ovis musimon	Netherlands	1	GGAATTTGAAAATCCATACATATTCCTTACTGAAAAGAAGATTAATCTTGTACAAAGCATTCTACCAATCTTAGAAAACGTTGCACGGTCTGGAAGACCATTGCTCATCATAGCTGAAGACGTTGAAGGTGAAGCTCTGAGCACGCTTGTACTCAATAAGCTCCGTGGTGGCCTTCAAGTTGCTGCTGTAAAGGCGCCTGGTTTCGGTGACAGGAGAAAAGACATGCTTGGCGATATTGCTGTAATAGTAGGCGCTAAGTATGTAGTAAATGACGAGCTTGCTGTTAAGATGGAAGATATCGCTCTAAGCGATCTTGGTACTGCTAAGAGCGTACGCATCACAAAAGACGCAACTACTATCATAGGTAGTGTTGATAGCAGTTCTGAAAGCATAGCTAG…
moufflon28	Ovis musimon	Netherlands	1	GCAGTTTGATCGCGGATATCTTTCGCCTTACTTTGTTACAAATGCTGAAAAAATGCTGGTGGAATTTGAAAATCCATACATATTCCTTACTGAAAAGAAGATTAATCTTGTACAAAGCATTCTACCAATCTTAGAAAACGTTGCACGGTCTGGAAGACCATTGCTCATCATAGCTGAAGACGTTGAAGGTGAAGCTCTGAGCACGCTTGTACTCAATAAGCTCCGTGGTGGCCTTCAAGTTGCTGCTGTAAAGGCGCCTGGTTTTGGTGACAGGAGAAAAGACATGCTTGGCGATATTGCTGTAATAGTAGGCGCTAAGTATGTAGTAAATGACGAGCTTGCTGTTAAGATGGAAGACATCGCTCTAAGCGATCTTGGTACTGCTAAGAGCGTACGCAT…
moufflon50	Ovis musimon	Netherlands	1	TGATCGCGGATATCTTTCGCCTTACTTTGTTACAAATGCTGAAAAAATGCTGGTGGAATTTGAAAATCCATACATATTCCTTACTGAAAAGAAGATTAATCTTGTACAAAGCATTCTACCAATCTTAGAAAACGTTGCACGGTCTGGAAGACCATTGCTCATCATAGCTGAAGACGTTGAAGGTGAAGCTCTTAGCACGCTTGTACTCAATAAGCTCCGTGGTGGCCTTCAAGTTGCTGCTGTAAAGGCGCCTGGTTTTGGTGACAGGAGAAAAGACATGCTTGGCGATATTGCTGTAATAGTAGGCGCTAAGTATGTAGTAAATGACGAGCTTGCTGTTAAGATGGAAGATATCGCTCTAAGCGATCTTGGTACTGCTAAGAGCGTACGCATCACAAA…
moufflon51	Ovis musimon	Netherlands	1	CGGATATCTTTCGCCTTACTTTGTTACAAATGCTGAAAAAATGCTGGTGGAATTTGAAAATCCATACATATTCCTTACTGAAAAGAAGATTAATCTTGTACAAAGCATTCTACCAATCTTAGAAAACGTTGCACGGTCTGGAAGACCATTGCTCATCATAGCTGAAGACGTTGAAGGTGAAGCTCTGAGCACGCTTGTACTCAATAAGCTCCGTGGTGGCCTTCAAGTTGCTGCTGTAAAGGCGCCTGGTTTCGGTGACAGGAGAAAAGACATGCTTGGCGATATTGCTGTAATAGTAGGCGCTAAGTATGTAGTAAATGACGAGCTTGCTGTTAAGATGGAAGATATCGCTCTAAGCGATCTTGGTACTGCTAAGAGCGTACGCATCACAAAAGACGC…
moufflon90	Ovis musimon	Netherlands	1	GCTGGTGGAATTTGAAAATCCATACATATTTCTTACTGAAAAGAAGATTAATCTTGTACAAAGCATTCTACCAATCTTAGAAAACGTTGCACGGTCTGGAAGACCATTGCTCATCATAGCTGAAGACGTTGAAGGTGAAGCTCTGAGCACGCTTGTACTCAATAAGCTCCGTGGTGGCCTTCAAGTTGCTGCTGTAAAGGCGCCTGGTTTCGGTGACAGGAGAAAAGACATGCTTGGCGATATTGCTGTAATAGTAGGCGCTAAGTATGTAGTAAATGACGAGCTTGCTGTTAAGATGGAAGACATCGCTCTAAGCGATCTTGGTACTGCTAAGAGCGTACGCATCACAAAAGACGCAACTACTATCATAGGTAGTGTTGATAGCAGTTCTGAAAGCAT…
MRI_20_01	Ovine	UK		CGGATATCTTTCGCCTTACTTTGTTACAAATGCTGAAAAAATGCTGGTGGAATTTGAAAATCCATACATATTCCTTACTGAAAAGAAGATTAATCTTGTACAAAGCATTCTACCAATCTTAGAAAACGTTGCACGGTCTGGAAGGCCATTGCTCATCATAGCTGAAGACGTTGAAGGTGAAGCTCTGAGCACGCTTGTACTCAATAAGCTCCGTGGTGGCCTTCAAGTTGCTGCTGTAAAGGCGCCTGGTTTTGGTGACAGGAGAAAAGACATGCTTGGCGATATTGCTGTAATAGTAGGCGCTAAGTATGTAGTAAATGACGAGCTTGCTGTTAAGATGGAAGATATCGCTCTAAGCGATCTTGGTACTGCTAAGAGCGTACGCATCACAAAAGACGC…
MRI_20_02	Ovine	UK		CGGATATCTTTCGCCTTACTTTGTTACAAATGCTGAAAAAATGCTGGTGGAATTTGAAAATCCATACATATTCCTTACTGAAAAGAAGATTAATCTTGTACAAAGCATTCTACCAATCTTAGAAAACGTTGCACGGTCTGGAAGACCATTGCTCATCATAGCTGAAGACGTTGAAGGTGAAGCTCTGAGCACGCTTGTACTCAATAAGCTCCGTGGTGGCCTTCAAGTTGCTGCTGTAAAGGCGCCTGGTTTCGGTGACAGGAGAAAAGACATGCTTGGCGATATTGCTGTAATAGTAGGCGCTAAGTATGTAGTAAATGACGAGCTTGCTGTTAAGATGGAAGACATCGCTCTAAGCGATCTTGGTACTGCTAAGAGCGTACGCATCACAAAAGACGC…
MRI_20_03	Ovine	UK		CGGATATCTTTCGCCTTACTTTGTTACAAATGCTGAAAAAATGCTGGTGGAATTTGAAAATCCATACATATTCCTTACTGAAAAGAAGATTAATCTTGTACAAAGCATTCTACCAATCTTAGAAAACGTTGCACGGTCTGGAAGGCCATTGCTCATCATAGCTGAAGACGTTGAAGGTGAAGCTCTTAGCACGCTTGTACTCAATAAGCTCCGTGGTGGCCTTCAAGTTGCTGCTGTAAAGGCGCCTGGTTTTGGTGACAGGAGAAAAGACATGCTTGGCGATATTGCTGTAATAGTAGGCGCTAAGTATGTAGTAAATGACGAGCTTGCTGTTAAGATGGAAGATATCGCTCTAAGCGATCTTGGTACTGCTAAGAGCGTACGCATCACAAAAGACGC…
MRI_20_04	Ovine	UK		CGGATATCTTTCGCCTTACTTTGTTACAAATGCTGAAAAAATGCTGGTGGAATTTGAAAATCCATACATATTCCTTACTGAAAAGAAGATTAATCTTGTACAAAGCATTCTACCAATCTTAGAAAACGTTGCACGGTCTGGAAGACCATTGCTCATCATAGCTGAAGACGTTGAAGGTGAAGCTCTGAGCACGCTTGTACTCAATAAGCTCCGTGGTGGCCTTCAAGTTGCTGCTGTAAAGGCGCCTGGTTTTGGTGACAGGAGAAAAGACATGCTTGGCGATATTGCTGTAATAGTAGGCGCTAAGTATGTAGTAAATGACGAGCTTGCTGTTAAGATGGAAGATATCGCTCTAAGCGATCTTGGTACTGCTAAGAGCGTACGCATCACAAAAGACGC…
MRI_20_05	Ovine	UK		CGGATATCTTTCGCCTTACTTTGTTACAAATGCTGAAAAAATGCTGGTGGAATTTGAAAATCCATACATATTCCTTACTGAAAAGAAGATTAATCTTGTACAAAGCATTCTACCAATCTTAGAAAACGTTGCACGGTCTGGAAGACCATTGCTCATCATAGCTGAAGACGTTGAAGGTGAAGCTCTGAGCACGCTTGTACTCAATAAGCTCCGTGGTGGCCTTCAAGTTGCTGCTGTAAAGGCGCCTGGTTTTGGTGACAGGAGAAAAGACATGCTTGGCGATATTGCTGTAATAGTAGGCGCTAAGTATGTAGTAAATGACGAGCTTGCTGTTAAGATGGAAGATATCGCTCTAAGCGATCTTGGTACTGCTAAGAGCGTACGCATCACAAAAGACGC…
MRI_20_06	Bovine	UK		CGGATATCTTTCGCCTTACTTTGTTACAAATGCTGAAAAAATGCTGGTGGAATTTGAAAATCCATACATATTCCTTACTGAAAAGAAGATTAATCTTGTACAAAGCATTCTACCAATCTTAGAAAACGTTGCACGGTCTGGAAGACCATTGCTCATCATAGCTGAAGACGTTGAAGGTGAAGCTCTGAGCACGCTTGTACTCAATAAGCTCCGTGGTGGCCTTCAAGTTGCTGCTGTAAAGGCGCCTGGTTTCGGTGACAGGAGAAAAGACATGCTTGGCGATATTGCTGTAATAGTAGGCGCTAAGTATGTAGTAAATGACGAGCTTGCTGTTAAGATGGAAGACATCGCTCTAAGCGATCTTGGTACTGCTAAGAGCGTACGCATCACAAAAGACGC…
MRI_20_07	Ovine	UK		CGGATATCTTTCGCCTTACTTTGTTACAAATGCTGAAAAAATGCTGGTGGAATTTGAAAATCCATACATATTCCTTACTGAAAAGAAGATTAATCTTGTACAAAGCATTCTACCAATCTTAGAAAACGTTGCACGGTCTGGAAGGCCATTGCTCATCATAGCTGAAGACGTTGAAGGTGAAGCTCTTAGCACGCTTGTACTCAATAAGCTCCGTGGTGGCCTTCAAGTTGCTGCTGTAAAGGCGCCTGGTTTTGGTGACAGGAGAAAAGACATGCTTGGCGATATTGCTGTAATAGTAGGCGCTAAGTATGTAGTAAATGACGAGCTTGCTGTTAAGATGGAAGATATCGCTCTAAGCGATCTTGGTACTGCTAAGAGCGTACGCATCACAAAAGACGC…
MRI_20_08	Ovine	UK	duplicate	CGGATATCTTTCGCCTTACTTTGTTACAAATGCTGAAAAAATGCTGGTGGAATTTGAAAATCCATACATATTCCTTACTGAAAAGAAGATTAATCTTGTACAAAGCATTCTACCAATCTTAGAAAACGTTGCACGGTCTGGAAGACCATTGCTCATCATAGCTGAAGACGTTGAAGGTGAAGCTCTGAGCACGCTTGTACTCAATAAGCTCCGTGGTGGCCTTCAAGTTGCTGCTGTAAAGGCGCCTGGTTTTGGTGACAGGAGAAAAGACATGCTTGGCGATATTGCTGTAATAGTAGGCGCTAAGTATGTAGTAAATGACGAGCTTGCTGTTAAGATGGAAGATATCGCTCTAAGCGATCTTGGTACTGCTAAGAGCGTACGCATCACAAAAGACGC…
MRI_20_09	Ovine	UK		CGGATATCTTTCGCCTTACTTTGTTACAAATGCTGAAAAAATGCTGGTGGAATTTGAAAATCCATACATATTCCTTACTGAAAAGAAGATTAATCTTGTACAAAGCATTCTACCAATCTTAGAAAACGTTGCACGGTCTGGAAGGCCATTGCTCATCATAGCTGAAGACGTTGAAGGTGAAGCTCTGAGCACGCTTGTACTCAATAAGCTCCGTGGTGGCCTTCAAGTTGCTGCTGTAAAGGCGCCTGGTTTTGGTGACAGGAGAAAAGACATGCTTGGCGATATTGCTGTAATAGTAGGCGCTAAGTATGTAGTAAATGACGAGCTTGCTGTTAAGATGGAAGACATCGCTCTAAGCGATCTTGGTACTGCTAAGAGCGTACGCATCACAAAAGACGC…
MRI_20_10	Ovine	UK		CGGATATCTTTCGCCTTACTTTGTTACAAATGCTGAAAAAATGCTGGTGGAATTTGAAAATCCATACATATTCCTTACTGAAAAGAAGATTAATCTTGTACAAAGCATTCTACCAATCTTAGAAAACGTTGCACGGTCTGGAAGACCATTGCTCATCATAGCTGAAGACGTTGAAGGTGAAGCTCTGAGCACGCTTGTACTCAATAAGCTCCGTGGTGGCCTTCAAGTTGCTGCTGTAAAGGCGCCTGGTTTCGGTGACAGGAGAAAAGACATGCTTGGCGATATTGCTGTAATAGTAGGCGCTAAGTATGTAGTAAATGACGAGCTTGCTGTTAAGATGGAAGACATCGCTCTAAGCGATCTTGGTACTGCTAAGAGCGTACGCATCACAAAAGACGC…
MRI_20_11	Ovine	UK		CGGATATCTTTCGCCTTACTTTGTTACAAATGCTGAAAAAATGCTGGTGGAATTTGAAAATCCATACATATTCCTTACTGAAAAGAAGATTAATCTTGTACAAAGCATTCTACCAATCTTAGAAAACGTTGCACGGTCTGGAAGGCCATTGCTCATCATAGCTGAAGACGTTGAAGGTGAAGCTCTGAGCACGCTTGTACTCAATAAGCTCCGTGGTGGCCTTCAAGTTGCTGCTGTAAAGGCGCCTGGTTTCGGTGACAGGAGAAAAGACATGCTTGGCGATATTGCTGTAATAGTAGGCGCTAAGTATGTAGTAAATGACGAGCTTGCTGTTAAGATGGAAGACATCGCTCTAAGCGATCTTGGTACTGCTAAGAGCGTACGCATCACAAAAGACGC…
MRI-_21_12	Ovine	UK		CGGATATCTTTCGCCTTACTTTGTTACAAATGCTGAAAAAATGCTGGTGGAATTTGAAAATCCATACATATTCCTTACTGAAAAGAAGATTAATCTTGTACAAAGCATTCTACCAATCTTAGAAAACGTTGCACGGTCTGGAAGACCATTGCTCATCATAGCTGAAGACGTTGAAGGTGAAGCTCTKAGCACGCTTGTACTCAATAAGCTCCGTGGTGGCCTTCAAGTTGCTGCTGTAAAGGCGCCTGGTTTCGGTGACAGGAGAAAAGACATGCTTGGCGATATTGCTGTAATAGTAGGCGCTAAGTATGTAGTAAATGACGAGCTTGCTGTTAAGATGGAAGACATCGCTCTAAGCGATCTTGGTACTGCTAAGAGCGTACGCATCACAAAAGACGC…
MRI-_21_13	Ovine	UK		CGGATATCTTTCGCCTTACTTTGTTACAAATGCTGAAAAAATGCTGGTGGAATTTGAAAATCCATACATATTCCTTACTGAAAAGAAGATTAATCTTGTACAAAGCATTCTACCAATCTTAGAAAACGTTGCACGGTCTGGAAGGCCATTGCTCATCATAGCTGAAGACGTTGAAGGTGAAGCTCTTAGCACGCTTGTACTCAATAAGCTCCGTGGTGGCCTTCAAGTTGCTGCTGTAAAGGCGCCTGGTTTTGGTGACAGGAGAAAAGACATGCTTGGCGATATTGCTGTAATAGTAGGCGCTAAGTATGTAGTAAATGACGAGCTTGCTGTTAAGATGGAAGACATCGCTCTAAGCGATCTTGGTACTGCTAAGAGCGTACGCATCACAAAAGACGC…
MRI-_21_14	Ovine	UK	duplicate	CGGATATCTTTCGCCTTACTTTGTTACAAATGCTGAAAAAATGCTGGTGGAATTTGAAAATCCATACATATTCCTTACTGAAAAGAAGATTAATCTTGTACAAAGCATTCTACCAATCTTAGAAAACGTTGCACGGTCTGGAAGACCATTGCTCATCATAGCTGAAGACGTTGAAGGTGAAGCTCTGAGCACGCTTGTACTCAATAAGCTCCGTGGTGGCCTTCAAGTTGCTGCTGTAAAGGCGCCTGGTTTTGGTGACAGGAGAAAAGACATGCTTGGCGATATTGCTGTAATAGTAGGCGCTAAGTATGTAGTAAATGACGAGCTTGCTGTTAAGATGGAAGATATCGCTCTAAGCGATCTTGGTACTGCTAAGAGCGTACGCATCACAAAAGACGC…
MRI-_21_15	Ovine	UK	duplicate	CGGATATCTTTCGCCTTACTTTGTTACAAATGCTGAAAAAATGCTGGTGGAATTTGAAAATCCATACATATTCCTTACTGAAAAGAAGATTAATCTTGTACAAAGCATTCTACCAATCTTAGAAAACGTTGCACGGTCTGGAAGGCCATTGCTCATCATAGCTGAAGACGTTGAAGGTGAAGCTCTTAGCACGCTTGTACTCAATAAGCTCCGTGGTGGCCTTCAAGTTGCTGCTGTAAAGGCGCCTGGTTTTGGTGACAGGAGAAAAGACATGCTTGGCGATATTGCTGTAATAGTAGGCGCTAAGTATGTAGTAAATGACGAGCTTGCTGTTAAGATGGAAGATATCGCTCTAAGCGATCTTGGTACTGCTAAGAGCGTACGCATCACAAAAGACGC…
MRI-_21_16	Ovine	UK	duplicate	CGGATATCTTTCGCCTTACTTTGTTACAAATGCTGAAAAAATGCTGGTGGAATTTGAAAATCCATACATATTCCTTACTGAAAAGAAGATTAATCTTGTACAAAGCATTCTACCAATCTTAGAAAACGTTGCACGGTCTGGAAGACCATTGCTCATCATAGCTGAAGACGTTGAAGGTGAAGCTCTGAGCACGCTTGTACTCAATAAGCTCCGTGGTGGCCTTCAAGTTGCTGCTGTAAAGGCGCCTGGTTTTGGTGACAGGAGAAAAGACATGCTTGGCGATATTGCTGTAATAGTAGGCGCTAAGTATGTAGTAAATGACGAGCTTGCTGTTAAGATGGAAGATATCGCTCTAAGCGATCTTGGTACTGCTAAGAGCGTACGCATCACAAAAGACGC…
MRI-_21_17	Ovine	UK	duplicate	CGGATATCTTTCGCCTTACTTTGTTACAAATGCTGAAAAAATGCTGGTGGAATTTGAAAATCCATACATATTCCTTACTGAAAAGAAGATTAATCTTGTACAAAGCATTCTACCAATCTTAGAAAACGTTGCACGGTCTGGAAGGCCATTGCTCATCATAGCTGAAGACGTTGAAGGTGAAGCTCTTAGCACGCTTGTACTCAATAAGCTCCGTGGTGGCCTTCAAGTTGCTGCTGTAAAGGCGCCTGGTTTTGGTGACAGGAGAAAAGACATGCTTGGCGATATTGCTGTAATAGTAGGCGCTAAGTATGTAGTAAATGACGAGCTTGCTGTTAAGATGGAAGACATCGCTCTAAGCGATCTTGGTACTGCTAAGAGCGTACGCATCACAAAAGACGC…
MRI-_21_18	Ovine	UK		CGGATATCTTTCGCCTTACTTTGTTACAAATGCTGAAAAAATGCTGGTGGAATTTGAAAATCCATACATATTCCTTACTGAAAAGAAGATTAATCTTGTACAAAGCATTCTACCAATCTTAGAAAACGTTGCACGGTCTGGAAGGCCATTGCTCATCATAGCTGAAGACGTTGAAGGTGAAGCTCTGAGCACGCTTGTACTCAATAAGCTCCGTGGTGGCCTTCAAGTTGCTGCTGTAAAGGCGCCTGGTTTCGGTGACAGGAGAAAAGACATGCTTGGCGATATTGCTGTAATAGTAGGCGCTAAGTATGTAGTAAATGACGAGCTTGCTGTTAAGATGGAAGACATCGCTCTAAGCGATCTTGGTACTGCTAAGAGCGTACGCATCACAAAAGACGC…
MRI_22_19	Ovine	UK		CGGATATCTTTCGCCTTACTTTGTTACAAATGCTGAAAAAATGCTGGTGGAATTTGAAAATCCATACATATTCCTTACTGAAAAGAAGATTAATCTTGTACAAAGCATTCTACCAATCTTAGAAAACGTTGCACGGTCTGGAAGACCATTGCTCATCATAGCTGAAGACGTTGAAGGTGAAGCTCTTAGCACGCTTGTACTCAATAAGCTCCGTGGTGGCCTTCAAGTTGCTGCTGTAAAGGCGCCTGGTTTCGGTGACAGGAGAAAAGACATGCTTGGCGATATTGCTGTAATAGTAGGCGCTAAGTATGTAGTAAATGACGAGCTTGCTGTTAAGATGGAAGATATCGCTCTAAGCGATCTTGGTACTGCTAAGAGCGTACGCATCACAAAAGACGC…
MRI_22_20	Ovine	UK		CGGATATCTATCGCCTTACTTTGTTACAAATGCTGAAAAAATGCTGGTGGAATTTGAAAATCCATACATATTCCTTACTGAAAAGAAGATTAATCTTGTACAAAGCATTCTACCAATCTTAGAAAACGTTGCACGGTCTGGAAGACCATTGCTCATCATAGCTGAAGACGTTGAAGGTGAAGCTCTTAGCACGCTTGTACTCAATAAGCTCCGTGGTGGCCTTCAAGTTGCTGCTGTAAAGGCGCCTGGTTTCGGTGACAGGAGAAAAGACATGCTTGGCGATATTGCTGTAATAGTAGGCGCTAAGTATGTAGTAAATGACGAGCTTGCTGTTAAGATGGAAGACATCGCTCTAAGCGATCTTGGTACTGCTAAGAGCGTACGCATCACAAAAGACGC…
MRI_22_21	Ovine	UK		CGGATATCTTTCGCCTTACTTTGTTACAAATGCTGAAAAAATGCTGGTGGAATTTGAAAATCCATACATATTCCTTACTGAAAAGAAGATTAATCTTGTACAAAGCATTCTACCAATCTTAGAAAACGTTGCACGGTCTGGAAGGCCATTGCTCATCATAGCTGAAGACGTTGAAGGTGAAGCTCTTAGCACACTTGTACTCAATAAGCTCCGTGGTGGCCTTCAAGTTGCTGCTGTAAAGGCGCCTGGTTTTGGTGACAGGAGAAAAGACATGCTTGGCGATATTGCTGTAATAGTAGGCGCTAAGTATGTAGTAAATGACGAGCTTGCTGTTAAGATGGAAGACATCGCTCTAAGCGATCTTGGTACTGCTAAGAGCGTACGCATCACAAAAGACGC…
MRI_22_22	Ovine	UK	duplicate	CGGATATCTTTCGCCTTACTTTGTTACAAATGCTGAAAAAATGCTGGTGGAATTTGAAAATCCATACATATTCCTTACTGAAAAGAAGATTAATCTTGTACAAAGCATTCTACCAATCTTAGAAAACGTTGCACGGTCTGGAAGGCCATTGCTCATCATAGCTGAAGACGTTGAAGGTGAAGCTCTTAGCACGCTTGTACTCAATAAGCTCCGTGGTGGCCTTCAAGTTGCTGCTGTAAAGGCGCCTGGTTTTGGTGACAGGAGAAAAGACATGCTTGGCGATATTGCTGTAATAGTAGGCGCTAAGTATGTAGTAAATGACGAGCTTGCTGTTAAGATGGAAGATATCGCTCTAAGCGATCTTGGTACTGCTAAGAGCGTACGCATCACAAAAGACGC…
MRI_22_23	Ovine	UK		CGGATATCTTTCGCCTTACTTTGTTACAAATGCTGAAAAAATGCTGGTGGAATTTGAAAATCCATACATATTCCTTACTGAAAAGAAGATTAATCTTGTACAAAGCATTCTACCAATCTTAGAAAACGTTGCACGGTCTGGAAGACCATTGCTCATCATAGCTGAAGACGTTGAAGGTGAAGCTCTGAGCACACTTGTACTCAATAAGCTCCGTGGTGGCCTTCAAGTTGCTGCTGTAAAGGCGCCTGGTTTTGGTGACAGGAGAAAAGACATGCTTGGCGATATTGCTGTAATAGTAGGCGCTAAGTATGTAGTAAATGACGAGCTTGCTGTTAAGATGGAAGATATCGCTCTAAGCGATCTTGGTACTGCTAAGAGCGTACGCATCACAAAAGACGC…
MRI_22_24	Ovine	UK		CGGATATCTTTCGCCTTACTTTGTTACAAATGCTGAAAAAATGCTGGTGGAATTTGAAAATCCATACATATTCCTTACTGAAAAGAAGATTAATCTTGTACAAAGCATTCTACCAATCTTAGAAAACGTTGCACGGTCTGGAAGGCCATTGCTCATCATAGCTGAAGACGTTGAAGGTGAAGCTCTGAGCACGCTTGTACTCAATAAGCTCCGTGGTGGCCTTCAAGTTGCTGCTGTAAAGGCGCCTGGTTTYGGTGACAGGAGAAAAGACATGCTTGGCGATATTGCTGTAATAGTAGGCGCTAAGTATGTAGTAAATGACGAGCTTGCTGTTAAGATGGAAGATATCGCTCTAAGCGATCTTGGTACTGCTAAGAGCGTACGCATCACAAAAGACGC…
MRI_22_25	Ovine	UK		CGGATATCTTTCGCCTTACTTTGTTACAAATGCTGAAAAAATGCTGGTGGAATTTGAAAATCCATACATATTCCTTACTGAAAAGAAGATTAATCTTGTACAAAGCATTCTACCAATCTTAGAAAACGTTGCACGGTCTGGAAGGCCATTGCTCATCATAGCTGAAGACGTTGAAGGTGAAGCTCTGAGCACGCTTGTACTCAATAAGCTCCGTGGTGGCCTTCAAGTTGCTGCTGTAAAGGCGCCTGGTTTTGGTGACAGGAGAAAAGACATGCTTGGCGATATTGCTGTAATAGTAGGCGCTAAGTATGTAGTAAATGACGAGCTTGCTGTTAAGATGGAAGATATCGCTCTAAGCGATCTTGGTACTGCTAAGAGCGTACGCATCACAAAAGACGC…
MRI_22_26	Ovine	UK	duplicate	CGGATATCTTTCGCCTTACTTTGTTACAAATGCTGAAAAAATGCTGGTGGAATTTGAAAATCCATACATATTCCTTACTGAAAAGAAGATTAATCTTGTACAAAGCATTCTACCAATCTTAGAAAACGTTGCACGGTCTGGAAGACCATTGCTCATCATAGCTGAAGACGTTGAAGGTGAAGCTCTGAGCACGCTTGTACTCAATAAGCTCCGTGGTGGCCTTCAAGTTGCTGCTGTAAAGGCGCCTGGTTTTGGTGACAGGAGAAAAGACATGCTTGGCGATATTGCTGTAATAGTAGGCGCTAAGTATGTAGTAAATGACGAGCTTGCTGTTAAGATGGAAGATATCGCTCTAAGCGATCTTGGTACTGCTAAGAGCGTACGCATCACAAAAGACGC…
MRI_22_27	Ovine	UK	duplicate	CGGATATCTTTCGCCTTACTTTGTTACAAATGCTGAAAAAATGCTGGTGGAATTTGAAAATCCATACATATTCCTTACTGAAAAGAAGATTAATCTTGTACAAAGCATTCTACCAATCTTAGAAAACGTTGCACGGTCTGGAAGGCCATTGCTCATCATAGCTGAAGACGTTGAAGGTGAAGCTCTTAGCACGCTTGTACTCAATAAGCTCCGTGGTGGCCTTCAAGTTGCTGCTGTAAAGGCGCCTGGTTTTGGTGACAGGAGAAAAGACATGCTTGGCGATATTGCTGTAATAGTAGGCGCTAAGTATGTAGTAAATGACGAGCTTGCTGTTAAGATGGAAGATATCGCTCTAAGCGATCTTGGTACTGCTAAGAGCGTACGCATCACAAAAGACGC…
MRI_22_28	Ovine	UK	duplicate	CGGATATCTTTCGCCTTACTTTGTTACAAATGCTGAAAAAATGCTGGTGGAATTTGAAAATCCATACATATTCCTTACTGAAAAGAAGATTAATCTTGTACAAAGCATTCTACCAATCTTAGAAAACGTTGCACGGTCTGGAAGGCCATTGCTCATCATAGCTGAAGACGTTGAAGGTGAAGCTCTTAGCACGCTTGTACTCAATAAGCTCCGTGGTGGCCTTCAAGTTGCTGCTGTAAAGGCGCCTGGTTTTGGTGACAGGAGAAAAGACATGCTTGGCGATATTGCTGTAATAGTAGGCGCTAAGTATGTAGTAAATGACGAGCTTGCTGTTAAGATGGAAGACATCGCTCTAAGCGATCTTGGTACTGCTAAGAGCGTACGCATCACAAAAGACGC…
MRI_22_29	Ovine	UK	duplicate	CGGATATCTTTCGCCTTACTTTGTTACAAATGCTGAAAAAATGCTGGTGGAATTTGAAAATCCATACATATTCCTTACTGAAAAGAAGATTAATCTTGTACAAAGCATTCTACCAATCTTAGAAAACGTTGCACGGTCTGGAAGACCATTGCTCATCATAGCTGAAGACGTTGAAGGTGAAGCTCTGAGCACGCTTGTACTCAATAAGCTCCGTGGTGGCCTTCAAGTTGCTGCTGTAAAGGCGCCTGGTTTCGGTGACAGGAGAAAAGACATGCTTGGCGATATTGCTGTAATAGTAGGCGCTAAGTATGTAGTAAATGACGAGCTTGCTGTTAAGATGGAAGACATCGCTCTAAGCGATCTTGGTACTGCTAAGAGCGTACGCATCACAAAAGACGC…
MRI_22_30	Ovine	UK	duplicate	CGGATATCTTTCGCCTTACTTTGTTACAAATGCTGAAAAAATGCTGGTGGAATTTGAAAATCCATACATATTCCTTACTGAAAAGAAGATTAATCTTGTACAAAGCATTCTACCAATCTTAGAAAACGTTGCACGGTCTGGAAGACCATTGCTCATCATAGCTGAAGACGTTGAAGGTGAAGCTCTGAGCACACTTGTACTCAATAAGCTCCGTGGTGGCCTTCAAGTTGCTGCTGTAAAGGCGCCTGGTTTTGGTGACAGGAGAAAAGACATGCTTGGCGATATTGCTGTAATAGTAGGCGCTAAGTATGTAGTAAATGACGAGCTTGCTGTTAAGATGGAAGATATCGCTCTAAGCGATCTTGGTACTGCTAAGAGCGTACGCATCACAAAAGACGC…
MRI_22_31	Bovine	UK	duplicate	CGGATATCTTTCGCCTTACTTTGTTACAAATGCTGAAAAAATGCTGGTGGAATTTGAAAATCCATACATATTCCTTACTGAAAAGAAGATTAATCTTGTACAAAGCATTCTACCAATCTTAGAAAACGTTGCACGGTCTGGAAGACCATTGCTCATCATAGCTGAAGACGTTGAAGGTGAAGCTCTGAGCACACTTGTACTCAATAAGCTCCGTGGTGGCCTTCAAGTTGCTGCTGTAAAGGCGCCTGGTTTTGGTGACAGGAGAAAAGACATGCTTGGCGATATTGCTGTAATAGTAGGCGCTAAGTATGTAGTAAATGACGAGCTTGCTGTTAAGATGGAAGATATCGCTCTAAGCGATCTTGGTACTGCTAAGAGCGTACGCATCACAAAAGACGC…
MRI_22_32	Ovine	UK	duplicate	CGGATATCTTTCGCCTTACTTTGTTACAAATGCTGAAAAAATGCTGGTGGAATTTGAAAATCCATACATATTCCTTACTGAAAAGAAGATTAATCTTGTACAAAGCATTCTACCAATCTTAGAAAACGTTGCACGGTCTGGAAGGCCATTGCTCATCATAGCTGAAGACGTTGAAGGTGAAGCTCTGAGCACGCTTGTACTCAATAAGCTCCGTGGTGGCCTTCAAGTTGCTGCTGTAAAGGCGCCTGGTTTTGGTGACAGGAGAAAAGACATGCTTGGCGATATTGCTGTAATAGTAGGCGCTAAGTATGTAGTAAATGACGAGCTTGCTGTTAAGATGGAAGATATCGCTCTAAGCGATCTTGGTACTGCTAAGAGCGTACGCATCACAAAAGACGC…
MRI_22_33	Ovine	UK		CGGATATCTTTCGCCTTACTTTGTTACAAATGCTGAAAAAATGCTGGTGGAATTTGAAAATCCATACATATTCCTTACTGAAAAGAAGATTAATCTTGTACAAAGCATTCTACCAATCTTAGAAAACGTTGCACGGTCTGGAAGACCATTGCTCATCATAGCTGAAGACGTTGAAGGTGAAGCTCTTAGCACGCTTGTACTCAATAAGCTCCGTGGTGGCCTTCAAGTTGCTGCTGTAAAGGCGCCTGGTTTTGGTGACAGGAGAAAAGACATGCTTGGCGATATTGCTGTAATAGTAGGCGCTAAGTATGTAGTAAATGACGAGCTTGCTGTTAAGATGGAAGATATCGCTCTAAGCGATCTTGGTACTGCTAAGAGCGTACGCATCACAAAAGACGC…
MRI_22_34	Ovine	UK	duplicate	CGGATATCTTTCGCCTTACTTTGTTACAAATGCTGAAAAAATGCTGGTGGAATTTGAAAATCCATACATATTCCTTACTGAAAAGAAGATTAATCTTGTACAAAGCATTCTACCAATCTTAGAAAACGTTGCACGGTCTGGAAGACCATTGCTCATCATAGCTGAAGACGTTGAAGGTGAAGCTCTGAGCACGCTTGTACTCAATAAGCTCCGTGGTGGCCTTCAAGTTGCTGCTGTAAAGGCGCCTGGTTTCGGTGACAGGAGAAAAGACATGCTTGGCGATATTGCTGTAATAGTAGGCGCTAAGTATGTAGTAAATGACGAGCTTGCTGTTAAGATGGAAGACATCGCTCTAAGCGATCTTGGTACTGCTAAGAGCGTACGCATCACAAAAGACGC…
MRI_22_35	Ovine	UK	duplicate	CGGATATCTTTCGCCTTACTTTGTTACAAATGCTGAAAAAATGCTGGTGGAATTTGAAAATCCATACATATTCCTTACTGAAAAGAAGATTAATCTTGTACAAAGCATTCTACCAATCTTAGAAAACGTTGCACGGTCTGGAAGGCCATTGCTCATCATAGCTGAAGACGTTGAAGGTGAAGCTCTTAGCACGCTTGTACTCAATAAGCTCCGTGGTGGCCTTCAAGTTGCTGCTGTAAAGGCGCCTGGTTTTGGTGACAGGAGAAAAGACATGCTTGGCGATATTGCTGTAATAGTAGGCGCTAAGTATGTAGTAAATGACGAGCTTGCTGTTAAGATGGAAGATATCGCTCTAAGCGATCTTGGTACTGCTAAGAGCGTACGCATCACAAAAGACGC…
MRI_22_36	Ovine	UK	duplicate	CGGATATCTTTCGCCTTACTTTGTTACAAATGCTGAAAAAATGCTGGTGGAATTTGAAAATCCATACATATTCCTTACTGAAAAGAAGATTAATCTTGTACAAAGCATTCTACCAATCTTAGAAAACGTTGCACGGTCTGGAAGGCCATTGCTCATCATAGCTGAAGACGTTGAAGGTGAAGCTCTTAGCACGCTTGTACTCAATAAGCTCCGTGGTGGCCTTCAAGTTGCTGCTGTAAAGGCGCCTGGTTTTGGTGACAGGAGAAAAGACATGCTTGGCGATATTGCTGTAATAGTAGGCGCTAAGTATGTAGTAAATGACGAGCTTGCTGTTAAGATGGAAGATATCGCTCTAAGCGATCTTGGTACTGCTAAGAGCGTACGCATCACAAAAGACGC…
MRI_22_37	Bovine	UK	duplicate	CGGATATCTTTCGCCTTACTTTGTTACAAATGCTGAAAAAATGCTGGTGGAATTTGAAAATCCATACATATTCCTTACTGAAAAGAAGATTAATCTTGTACAAAGCATTCTACCAATCTTAGAAAACGTTGCACGGTCTGGAAGACCATTGCTCATCATAGCTGAAGACGTTGAAGGTGAAGCTCTGAGCACGCTTGTACTCAATAAGCTCCGTGGTGGCCTTCAAGTTGCTGCTGTAAAGGCGCCTGGTTTTGGTGACAGGAGAAAAGACATGCTTGGCGATATTGCTGTAATAGTAGGCGCTAAGTATGTAGTAAATGACGAGCTTGCTGTTAAGATGGAAGATATCGCTCTAAGCGATCTTGGTACTGCTAAGAGCGTACGCATCACAAAAGACGC…
MRI_22_38	Ovine	UK		CGGATATCTTTCGCCTTACTTTGTTACAAATGCTGAAAAAATGCTGGTGGAATTTGAAAATCCATACATATTCCTTACTGAAAAGAAGATTAATCTTGTACAAAGCATTCTACCAATCTTAGAAAACGTTGCACGGTCTGGAAGACCATTGCTCATCATAGCTGAAGACGTTGAAGGTGAAGCTCTTAGCACGCTTGTACTCAATAAGCTCCGTGGTGGCCTTCAAGTTGCTGCTGTAAAGGCGCCTGGTTTTGGTGACAGGAGAAAAGACATGCTTGGCGATATTGCTGTAATAGTAGGCGCTAAGTATGTAGTAAATGACGAGCTTGCTGTTAAGATGGAAGACATCGCTCTAAGCGATCTTGGTACTGCTAAGAGCGTACGCATCACAAAAGACGC…
MRI_22_39	Ovine	UK	duplicate	CGGATATCTTTCGCCTTACTTTGTTACAAATGCTGAAAAAATGCTGGTGGAATTTGAAAATCCATACATATTCCTTACTGAAAAGAAGATTAATCTTGTACAAAGCATTCTACCAATCTTAGAAAACGTTGCACGGTCTGGAAGACCATTGCTCATCATAGCTGAAGACGTTGAAGGTGAAGCTCTGAGCACGCTTGTACTCAATAAGCTCCGTGGTGGCCTTCAAGTTGCTGCTGTAAAGGCGCCTGGTTTTGGTGACAGGAGAAAAGACATGCTTGGCGATATTGCTGTAATAGTAGGCGCTAAGTATGTAGTAAATGACGAGCTTGCTGTTAAGATGGAAGATATCGCTCTAAGCGATCTTGGTACTGCTAAGAGCGTACGCATCACAAAAGACGC…
MRI_22_40	Ovine	UK		CGGATATCTTTCGCCTTACTTTGTTACAAATGCTGAAAAAATGCTGGTGGAATTTGAAAATCCATACATATTTCTTACTGAAAAGAAGATTAATCTTGTACAAAGCATTCTACCAATCTTAGAAAACGTTGCACGGTCTGGAAGACCATTGCTCATCATAGCTGAAGACGTTGAAGGTGAAGCTCTGAGCACGCTTGTACTCAATAAGCTCCGTGGTGGCCTTCAAGTTGCTGCTGTAAAGGCGCCTGGTTTCGGTGACAGGAGAAAAGACATGCTTGGCGATATTGCTGTAATAGTAGGCGCTAAGTATGTAGTAAATGACGAGCTTGCTGTTAAGATGGAAGACATCGCTCTAAGCGATCTTGGTACTGCTAAGAGCGTACGCATCACAAAAGACGC…
MRI_22_41	Ovine	UK	duplicate	CGGATATCTTTCGCCTTACTTTGTTACAAATGCTGAAAAAATGCTGGTGGAATTTGAAAATCCATACATATTCCTTACTGAAAAGAAGATTAATCTTGTACAAAGCATTCTACCAATCTTAGAAAACGTTGCACGGTCTGGAAGGCCATTGCTCATCATAGCTGAAGACGTTGAAGGTGAAGCTCTTAGCACGCTTGTACTCAATAAGCTCCGTGGTGGCCTTCAAGTTGCTGCTGTAAAGGCGCCTGGTTTTGGTGACAGGAGAAAAGACATGCTTGGCGATATTGCTGTAATAGTAGGCGCTAAGTATGTAGTAAATGACGAGCTTGCTGTTAAGATGGAAGATATCGCTCTAAGCGATCTTGGTACTGCTAAGAGCGTACGCATCACAAAAGACGC…
MRI_22_42	Ovine	UK		CGGATATCTTTCGCCTTACTTTGTTACAAATGCTGAAAAAATGCTGGTGGAATTTGAAAATCCATACATATTCCTTACTGAAAAGAAGATTAATCTTGTACAAAGCATTCTACCAATCTTAGAAAACGTTGCACGGTCTGGAAGGCCATTGCTCATCATAGCTGAAGACGTTGAAGGTGAAGCTCTGAGCACGCTTGTACTCAATAAGCTCCGTGGTGGCCTTCAAGTTGCTGCTGTAAAGGCGCCTGGTTTTGGTGACAGGAGAAAAGACATGCTTGGCGATATTGCTGTAATAGTAGGCGCTAAGTATGTAGTAAATGACGAGCTTGCTGTTAAGATGGAAGACATCGCTCTAAGCGATCTTGGTACTGCTAAGAGCGTACGCATCACAAAAGACGC…
MRI_22_43	Ovine	UK	duplicate	CGGATATCTTTCGCCTTACTTTGTTACAAATGCTGAAAAAATGCTGGTGGAATTTGAAAATCCATACATATTCCTTACTGAAAAGAAGATTAATCTTGTACAAAGCATTCTACCAATCTTAGAAAACGTTGCACGGTCTGGAAGACCATTGCTCATCATAGCTGAAGACGTTGAAGGTGAAGCTCTGAGCACGCTTGTACTCAATAAGCTCCGTGGTGGCCTTCAAGTTGCTGCTGTAAAGGCGCCTGGTTTCGGTGACAGGAGAAAAGACATGCTTGGCGATATTGCTGTAATAGTAGGCGCTAAGTATGTAGTAAATGACGAGCTTGCTGTTAAGATGGAAGACATCGCTCTAAGCGATCTTGGTACTGCTAAGAGCGTACGCATCACAAAAGACGC…
MRI_22_44	Ovine	UK	duplicate	CGGATATCTTTCGCCTTACTTTGTTACAAATGCTGAAAAAATGCTGGTGGAATTTGAAAATCCATACATATTCCTTACTGAAAAGAAGATTAATCTTGTACAAAGCATTCTACCAATCTTAGAAAACGTTGCACGGTCTGGAAGGCCATTGCTCATCATAGCTGAAGACGTTGAAGGTGAAGCTCTGAGCACGCTTGTACTCAATAAGCTCCGTGGTGGCCTTCAAGTTGCTGCTGTAAAGGCGCCTGGTTTTGGTGACAGGAGAAAAGACATGCTTGGCGATATTGCTGTAATAGTAGGCGCTAAGTATGTAGTAAATGACGAGCTTGCTGTTAAGATGGAAGACATCGCTCTAAGCGATCTTGGTACTGCTAAGAGCGTACGCATCACAAAAGACGC…
MRI_22_45	Ovine	UK		YGGATATCTTTCGCCTTACTTTGTTACAAATGCTGAAAAAATGCTGGTGGAATTTGAAAATCCATACATATTCCTTACTGAAAAGAAGATTAATCTTGTACAAAGCATTCTACCAATCTTAGAAAACGTTGCACGGTCTGGAAGACCATTGCTCATCATAGCTGAAGACGTTGAAGGTGAAGCTCTGAGCACGCTTGTACTCAATAAGCTCCGTGGTGGCCTTCAAGTTGCTGCTGTAAAGGCGCCTGGTTTTGGTGACAGGAGAAAAGACATGCTTGGCGATATTGCTGTAATAGTAGGCGCTAAGTATGTAGTAAATGACGAGCTTGCTGTTAAGATGGAAGACATCGCTCTAAGCGATCTTGGTACTGCTAAGAGCGTACGCATCACAAAAGACGC…
MRI_22_46	Ovine	UK	duplicate	CGGATATCTTTCGCCTTACTTTGTTACAAATGCTGAAAAAATGCTGGTGGAATTTGAAAATCCATACATATTCCTTACTGAAAAGAAGATTAATCTTGTACAAAGCATTCTACCAATCTTAGAAAACGTTGCACGGTCTGGAAGACCATTGCTCATCATAGCTGAAGACGTTGAAGGTGAAGCTCTGAGCACGCTTGTACTCAATAAGCTCCGTGGTGGCCTTCAAGTTGCTGCTGTAAAGGCGCCTGGTTTCGGTGACAGGAGAAAAGACATGCTTGGCGATATTGCTGTAATAGTAGGCGCTAAGTATGTAGTAAATGACGAGCTTGCTGTTAAGATGGAAGACATCGCTCTAAGCGATCTTGGTACTGCTAAGAGCGTACGCATCACAAAAGACGC…
MRI_22_47	Ovine	UK	duplicate	CGGATATCTTTCGCCTTACTTTGTTACAAATGCTGAAAAAATGCTGGTGGAATTTGAAAATCCATACATATTCCTTACTGAAAAGAAGATTAATCTTGTACAAAGCATTCTACCAATCTTAGAAAACGTTGCACGGTCTGGAAGACCATTGCTCATCATAGCTGAAGACGTTGAAGGTGAAGCTCTGAGCACGCTTGTACTCAATAAGCTCCGTGGTGGCCTTCAAGTTGCTGCTGTAAAGGCGCCTGGTTTCGGTGACAGGAGAAAAGACATGCTTGGCGATATTGCTGTAATAGTAGGCGCTAAGTATGTAGTAAATGACGAGCTTGCTGTTAAGATGGAAGACATCGCTCTAAGCGATCTTGGTACTGCTAAGAGCGTACGCATCACAAAAGACGC…
MRI_22_48	Ovine	UK		CGGATATCTTTCGCCTTACTTTGTTACAAATGCTGaAAAAATGCTGGTGGAATTTGAAAATCCATACATATTCCTTACTGAAAAGAAGATTAATCTTGTACAAAGCATTCTACCAATCTTAGAAAACGTTGCACGGTCTGGAAGGCCATTGCTCATCATAGCTGAAGACGTTGAAGGTGAAGCTCTTAGCACGCTTGTACTCAATAAGCTCCGTGGTGGCCTTCAAGTTGCTGCTGTAAAGGCGCCTGGTTTTGGTGACAGGAGAAAAGACATGCTTGGCGATATTGCTGTAATAGTAGGCGCTAAGTATGTAGTAAATGACGAGCTTGCTGTTAAGATGGAAGATATCGCTCTAAGCGATCTTGGTACTGCTAAGAGCGTACGCATCACAAAAGACGC…
MRI_22_49	Ovine	UK		CGGATATCTTTCGCCTTACTTTGTTACAAATGCTGaAAAAATGCTGGTGGAATTTGAAAATCCATACATATTCCTTACTGAAAAGAAGATTAATCTTGTACAAAGCATTCTACCAATCTTAGAAAACGTTGCACGGTCTGGAAGGCCATTGCTCATCATAGCTGAAGACGTTGAAGGTGAAGCTCTTAGCACGCTTGTACTCAATAAGCTCCGTGGTGGCCTTCAAGTTGCTGCTGTAAAGGCGCCTGGTTTTGGTGACAGGAGAAAAGACATGCTTGGCGATATTGCTGTAATAGTAGGCGCTAAGTATGTAGTAAATGACGAGCTTGCTGTTAAGATGGAAGATATCGCTCTAAGCGATCTTGGTACTGCTAAGAGCGTACGCATCACAAAAGACGC…
MRI_22_50	Ovine	UK	duplicate	CGGATATCTTTCGCCTTACTTTGTTACAAATGCTGAAAAAATGCTGGTGGAATTTGAAAATCCATACATATTCCTTACTGAAAAGAAGATTAATCTTGTACAAAGCATTCTACCAATCTTAGAAAACGTTGCACGGTCTGGAAGACCATTGCTCATCATAGCTGAAGACGTTGAAGGTGAAGCTCTTAGCACGCTTGTACTCAATAAGCTCCGTGGTGGCCTTCAAGTTGCTGCTGTAAAGGCGCCTGGTTTTGGTGACAGGAGAAAAGACATGCTTGGCGATATTGCTGTAATAGTAGGCGCTAAGTATGTAGTAAATGACGAGCTTGCTGTTAAGATGGAAGATATCGCTCTAAGCGATCTTGGTACTGCTAAGAGCGTACGCATCACAAAAGACGC…
MRI_22_51	Ovine	UK	duplicate	CGGATATCTTTCGCCTTACTTTGTTACAAATGCTGAAAAAATGCTGGTGGAATTTGAAAATCCATACATATTCCTTACTGAAAAGAAGATTAATCTTGTACAAAGCATTCTACCAATCTTAGAAAACGTTGCACGGTCTGGAAGACCATTGCTCATCATAGCTGAAGACGTTGAAGGTGAAGCTCTGAGCACGCTTGTACTCAATAAGCTCCGTGGTGGCCTTCAAGTTGCTGCTGTAAAGGCGCCTGGTTTTGGTGACAGGAGAAAAGACATGCTTGGCGATATTGCTGTAATAGTAGGCGCTAAGTATGTAGTAAATGACGAGCTTGCTGTTAAGATGGAAGATATCGCTCTAAGCGATCTTGGTACTGCTAAGAGCGTACGCATCACAAAAGACGC…
MRI_22_52	Ovine	UK	duplicate	CGGATATCTTTCGCCTTACTTTGTTACAAATGCTGAAAAAATGCTGGTGGAATTTGAAAATCCATACATATTCCTTACTGAAAAGAAGATTAATCTTGTACAAAGCATTCTACCAATCTTAGAAAACGTTGCACGGTCTGGAAGGCCATTGCTCATCATAGCTGAAGACGTTGAAGGTGAAGCTCTTAGCACGCTTGTACTCAATAAGCTCCGTGGTGGCCTTCAAGTTGCTGCTGTAAAGGCGCCTGGTTTTGGTGACAGGAGAAAAGACATGCTTGGCGATATTGCTGTAATAGTAGGCGCTAAGTATGTAGTAAATGACGAGCTTGCTGTTAAGATGGAAGATATCGCTCTAAGCGATCTTGGTACTGCTAAGAGCGTACGCATCACAAAAGACGC…
MRI_22_53	Ovine	UK	duplicate	CGGATATCTTTCGCCTTACTTTGTTACAAATGCTGAAAAAATGCTGGTGGAATTTGAAAATCCATACATATTCCTTACTGAAAAGAAGATTAATCTTGTACAAAGCATTCTACCAATCTTAGAAAACGTTGCACGGTCTGGAAGGCCATTGCTCATCATAGCTGAAGACGTTGAAGGTGAAGCTCTGAGCACGCTTGTACTCAATAAGCTCCGTGGTGGCCTTCAAGTTGCTGCTGTAAAGGCGCCTGGTTTTGGTGACAGGAGAAAAGACATGCTTGGCGATATTGCTGTAATAGTAGGCGCTAAGTATGTAGTAAATGACGAGCTTGCTGTTAAGATGGAAGACATCGCTCTAAGCGATCTTGGTACTGCTAAGAGCGTACGCATCACAAAAGACGC…
MRI_22_54	Deer	UK		CGGATATCTTTCGCCTTACTTTGTTACAAATGCTGaAAAAATGCTGGTGGAATTTGAAAATCCATACATATTCCTTACTGAAAAGAAGATTAATCTTGTACAAAGCATTCTACCAATCTTAGAAAACGTTGCACGGTCTGGAAGACCATTGCTCATCATAGCTGAAGACGTTGAAGGTGAAGCTCTKAGCACACTTGTACTCAATAAGCTCCGTGGTGGCCTTCAAGTTGCTGCTGTAAAGGCGCCTGGTTTTGGTGACAGRAGAAAAGACATGCTTGGCGATATTGCTGTAATAGTAGGCGCTAAGTATGTAGTAAATGACGAGCTTGCTGTTAAGATGGAAGATATCGCTCTAAGCGATCTTGGTACTGCTAAGAGCGTACGCATCACAAAAGACGC…
MRI_22_55	Deer	UK	duplicate	CGGATATCTTTCGCCTTACTTTGTTACAAATGCTGAAAAAATGCTGGTGGAATTTGAAAATCCATACATATTCCTTACTGAAAAGAAGATTAATCTTGTACAAAGCATTCTACCAATCTTAGAAAACGTTGCACGGTCTGGAAGACCATTGCTCATCATAGCTGAAGACGTTGAAGGTGAAGCTCTGAGCACGCTTGTACTCAATAAGCTCCGTGGTGGCCTTCAAGTTGCTGCTGTAAAGGCGCCTGGTTTTGGTGACAGGAGAAAAGACATGCTTGGCGATATTGCTGTAATAGTAGGCGCTAAGTATGTAGTAAATGACGAGCTTGCTGTTAAGATGGAAGATATCGCTCTAAGCGATCTTGGTACTGCTAAGAGCGTACGCATCACAAAAGACGC…
MRI_22_56	Ovine	UK		CGGATATCTTTCGCCTTACTTTGTTACAAATGCTGAAAAAATGCTGGTGGAATTTGAAAATCCATACATATTCCTTACTGAAAAGAAGATTAATCTTGTACAAAGCATTCTACCAATCTTAGAAAACGTTGCACGGTCTGGAAGGCCATTGCTCATCATAGCTGAAGACGTTGAAGGTGAAGCTCTGAGCACGCTTGTACTCAATAAGCTCCGTGGTGGCCTTCAAGTTGCTGCTGTAAAGGCGCCTGGTTTTGGTGACAGGAGAAAAGACATGCTTGGCGATATTGCTGTAATAGTAGGCGCTAAGTATGTAGTAAATGACGAGCTTGCTGTTAAGATGGAAGATATCGCTCTAAGCGATCTTGGTACTGCTAAGAGCGTACGCATCACAAAAGACGC…
MRI_22_57	Ovine	UK	duplicate	CGGATATCTTTCGCCTTACTTTGTTACAAATGCTGAAAAAATGCTGGTGGAATTTGAAAATCCATACATATTCCTTACTGAAAAGAAGATTAATCTTGTACAAAGCATTCTACCAATCTTAGAAAACGTTGCACGGTCTGGAAGACCATTGCTCATCATAGCTGAAGACGTTGAAGGTGAAGCTCTGAGCACGCTTGTACTCAATAAGCTCCGTGGTGGCCTTCAAGTTGCTGCTGTAAAGGCGCCTGGTTTCGGTGACAGGAGAAAAGACATGCTTGGCGATATTGCTGTAATAGTAGGCGCTAAGTATGTAGTAAATGACGAGCTTGCTGTTAAGATGGAAGACATCGCTCTAAGCGATCTTGGTACTGCTAAGAGCGTACGCATCACAAAAGACGC…
MRI_22_58	Ovine	UK		CGGATATCTTTCGCCTTACTTTGTTACAAATGCTGAAAAAATGCTGGTGGAATTTGAAAATCCATACATATTCCTTACTGAAAAGAAGATTAATCTTGTACAAAGCATTCTACCAATCTTAGAAAACGTTGCACGGTCTGGAAGGCCATTGCTCATCATAGCTGAAGACGTTGAAGGTGAAGCTCTGAGCACGCTTGTACTCAATAAGCTCCGTGGTGGCCTTCAAGTTGCTGCTGTAAAGGCGCCTGGTTTTGGTGACAGGAGAAAAGACATGCTTGGCGATATTGCTGTAATAGTAGGCGCTAAGTATGTAGTAAATGACGAGCTTGCTGTTAAGATGGAAGAYATCGCTCTAAGCGATCTTGGTACTGCTAAGAGCGTACGCATCACAAAAGACGC…
MRI_22_59	Ovine	UK	duplicate	CGGATATCTTTCGCCTTACTTTGTTACAAATGCTGAAAAAATGCTGGTGGAATTTGAAAATCCATACATATTCCTTACTGAAAAGAAGATTAATCTTGTACAAAGCATTCTACCAATCTTAGAAAACGTTGCACGGTCTGGAAGGCCATTGCTCATCATAGCTGAAGACGTTGAAGGTGAAGCTCTGAGCACGCTTGTACTCAATAAGCTCCGTGGTGGCCTTCAAGTTGCTGCTGTAAAGGCGCCTGGTTTTGGTGACAGGAGAAAAGACATGCTTGGCGATATTGCTGTAATAGTAGGCGCTAAGTATGTAGTAAATGACGAGCTTGCTGTTAAGATGGAAGATATCGCTCTAAGCGATCTTGGTACTGCTAAGAGCGTACGCATCACAAAAGACGC…
MRI_22_60	Ovine	UK		CGGATATCTTTCGCCTTACTTTGTTACAAATGCTGAAAAAaTGCTGGTGGAATTTGAAAATCCATACATATTCCTTACTGAAAAGAAGATTAATCTTGTACAAAGCATTCTACCAATCTTAGAAAACGTTGCACGGTCTGGAAGGCCATTGCTCATCATAGCTGAAGACGTTGAAGGTGAAGCTCTKAGCACGCTTGTACTCAATAAGCTCCGTGGTGGCCTTCAAGTTGCTGCTGTAAAGGCGCCTGGTTTTGGTGACAGGAGAAAAGACATGCTTGGCGATATTGCTGTAATAGTAGGCGCTAAGTATGTAGTAAATGACGAGCTTGCTGTTAAGATGGAAGAYATCGCTCTAAGCGATCTTGGTACTGCTAAGAGCGTACGCATCACAAAAGACGC…
MRI_22_61	Ovine	UK	duplicate	CGGATATCTTTCGCCTTACTTTGTTACAAATGCTGAAAAAATGCTGGTGGAATTTGAAAATCCATACATATTCCTTACTGAAAAGAAGATTAATCTTGTACAAAGCATTCTACCAATCTTAGAAAACGTTGCACGGTCTGGAAGACCATTGCTCATCATAGCTGAAGACGTTGAAGGTGAAGCTCTGAGCACGCTTGTACTCAATAAGCTCCGTGGTGGCCTTCAAGTTGCTGCTGTAAAGGCGCCTGGTTTTGGTGACAGGAGAAAAGACATGCTTGGCGATATTGCTGTAATAGTAGGCGCTAAGTATGTAGTAAATGACGAGCTTGCTGTTAAGATGGAAGATATCGCTCTAAGCGATCTTGGTACTGCTAAGAGCGTACGCATCACAAAAGACGC…
MRI_22_62	Ovine	UK	duplicate	CGGATATCTTTCGCCTTACTTTGTTACAAATGCTGAAAAAATGCTGGTGGAATTTGAAAATCCATACATATTCCTTACTGAAAAGAAGATTAATCTTGTACAAAGCATTCTACCAATCTTAGAAAACGTTGCACGGTCTGGAAGGCCATTGCTCATCATAGCTGAAGACGTTGAAGGTGAAGCTCTTAGCACGCTTGTACTCAATAAGCTCCGTGGTGGCCTTCAAGTTGCTGCTGTAAAGGCGCCTGGTTTTGGTGACAGGAGAAAAGACATGCTTGGCGATATTGCTGTAATAGTAGGCGCTAAGTATGTAGTAAATGACGAGCTTGCTGTTAAGATGGAAGACATCGCTCTAAGCGATCTTGGTACTGCTAAGAGCGTACGCATCACAAAAGACGC…
MRI_22_63	Ovine	UK	duplicate	CGGATATCTTTCGCCTTACTTTGTTACAAATGCTGAAAAAATGCTGGTGGAATTTGAAAATCCATACATATTCCTTACTGAAAAGAAGATTAATCTTGTACAAAGCATTCTACCAATCTTAGAAAACGTTGCACGGTCTGGAAGACCATTGCTCATCATAGCTGAAGACGTTGAAGGTGAAGCTCTGAGCACGCTTGTACTCAATAAGCTCCGTGGTGGCCTTCAAGTTGCTGCTGTAAAGGCGCCTGGTTTTGGTGACAGGAGAAAAGACATGCTTGGCGATATTGCTGTAATAGTAGGCGCTAAGTATGTAGTAAATGACGAGCTTGCTGTTAAGATGGAAGATATCGCTCTAAGCGATCTTGGTACTGCTAAGAGCGTACGCATCACAAAAGACGC…
MRI_22_64	Ovine	UK		CGGATATCTTTCGCCTTACTTTGTTACAAATGCTGAAAAAATGCTGGTGGAATTTGAAAATCCATACATATTCCTTACTGAAAAGAAGATTAATCTTGTACAAAGCATTCTACCAATCTTAGAAAACGTTGCACGGTCTGGAAGACCATTGCTCATCATAGCTGAAGACGTTGAAGGTGAAGCTCTGAGCACACTTGTACTCAATAAGCTCCGTGGTGGCCTTCAAGTTGCTGCTGTAAAGGCGCCTGGTTTCGGTGACAGGAGAAAAGACATGCTTGGCGATATTGCTGTAATAGTAGGCGCTAAGTATGTAGTAAATGACGAGCTTGCTGTTAAGATGGAAGATATCGCTCTAAGCGATCTTGGTACTGCTAAGAGCGTACGCATCACAAAAGACGC…
MRI_22_65	Ovine	UK		CGGATATCTTTCGCCTTACTTTGTTACAAATGCTGAAAAAATGCTGGTGGAATTTGAAAATCCATACATATTCCTTACTGAAAAGAAGATTAATCTTGTACAAAGCATTCTACCAATCTTAGAAAACGTTGCACGGTCTGGAAGGCCATTGCTCATCATAGCTGAAGACGTTGAAGGTGAAGCTCTTAGCACGCTTGTACTCAATAAGCTCCGTGGTGGCCTTCAAGTTGCTGCTGTAAAGGCGCCTGGTTTCGGTGACAGGAGAAAAGACATGCTTGGCGATATTGCTGTAATAGTAGGCGCTAAGTATGTAGTAAATGACGAGCTTGCTGTTAAGATGGAAGACATCGCTCTAAGCGATCTTGGTACTGCTAAGAGCGTACGCATCACAAAAGACGC…
MRI_22_66	Cervine	UK	duplicate	CGGATATCTTTCGCCTTACTTTGTTACAAATGCTGAAAAAATGCTGGTGGAATTTGAAAATCCATACATATTCCTTACTGAAAAGAAGATTAATCTTGTACAAAGCATTCTACCAATCTTAGAAAACGTTGCACGGTCTGGAAGACCATTGCTCATCATAGCTGAAGACGTTGAAGGTGAAGCTCTTAGCACGCTTGTACTCAATAAGCTCCGTGGTGGCCTTCAAGTTGCTGCTGTAAAGGCGCCTGGTTTTGGTGACAGGAGAAAAGACATGCTTGGCGATATTGCTGTAATAGTAGGCGCTAAGTATGTAGTAAATGACGAGCTTGCTGTTAAGATGGAAGATATCGCTCTAAGCGATCTTGGTACTGCTAAGAGCGTACGCATCACAAAAGACGC…
MRI_22_67	Bovine	UK		CGGATATCTTTCGCCTTACTTTGTTACAAATGCTGAAAAAATGCTGGTGGAATTTGAAAATCCATACATATTCCTTACTGAAAAGAAGATTAATCTTGTACAAAGCATTCTACCAATCTTAGAAAACGTTGCACGGTCTGGAAGACCATTGCTCATCATAGCTGAAGACGTTGAAGGTGAAGCTCTGAGCACGCTTGTACTCAATAAGCTCCGTGGTGGCCTTCAAGTTGCTGCTGTAAAGGCGCCTGGTTTCGGTGACAGGAGAAAAGACATGCTTGGCGATATTGCTGTAATAGTAGGCGCTAAGTATGTAGTAAATGACGAGCTTGCTGTTAAGATGGAAGACATCGCTCTAAGCGATCTTGGTACTGCTAAGAGCGTACGCATCACAAAAGACGC…
MRI_22_68	Bovine	UK	duplicate	CGGATATCTTTCGCCTTACTTTGTTACAAATGCTGAAAAAATGCTGGTGGAATTTGAAAATCCATACATATTCCTTACTGAAAAGAAGATTAATCTTGTACAAAGCATTCTACCAATCTTAGAAAACGTTGCACGGTCTGGAAGGCCATTGCTCATCATAGCTGAAGACGTTGAAGGTGAAGCTCTTAGCACGCTTGTACTCAATAAGCTCCGTGGTGGCCTTCAAGTTGCTGCTGTAAAGGCGCCTGGTTTTGGTGACAGGAGAAAAGACATGCTTGGCGATATTGCTGTAATAGTAGGCGCTAAGTATGTAGTAAATGACGAGCTTGCTGTTAAGATGGAAGACATCGCTCTAAGCGATCTTGGTACTGCTAAGAGCGTACGCATCACAAAAGACGC…
MRI_22_69	Ovine	UK	duplicate	CGGATATCTTTCGCCTTACTTTGTTACAAATGCTGAAAAAATGCTGGTGGAATTTGAAAATCCATACATATTCCTTACTGAAAAGAAGATTAATCTTGTACAAAGCATTCTACCAATCTTAGAAAACGTTGCACGGTCTGGAAGGCCATTGCTCATCATAGCTGAAGACGTTGAAGGTGAAGCTCTTAGCACGCTTGTACTCAATAAGCTCCGTGGTGGCCTTCAAGTTGCTGCTGTAAAGGCGCCTGGTTTTGGTGACAGGAGAAAAGACATGCTTGGCGATATTGCTGTAATAGTAGGCGCTAAGTATGTAGTAAATGACGAGCTTGCTGTTAAGATGGAAGACATCGCTCTAAGCGATCTTGGTACTGCTAAGAGCGTACGCATCACAAAAGACGC…
MRI_22_70	Ovine	UK	duplicate	CGGATATCTTTCGCCTTACTTTGTTACAAATGCTGAAAAAATGCTGGTGGAATTTGAAAATCCATACATATTCCTTACTGAAAAGAAGATTAATCTTGTACAAAGCATTCTACCAATCTTAGAAAACGTTGCACGGTCTGGAAGGCCATTGCTCATCATAGCTGAAGACGTTGAAGGTGAAGCTCTTAGCACGCTTGTACTCAATAAGCTCCGTGGTGGCCTTCAAGTTGCTGCTGTAAAGGCGCCTGGTTTTGGTGACAGGAGAAAAGACATGCTTGGCGATATTGCTGTAATAGTAGGCGCTAAGTATGTAGTAAATGACGAGCTTGCTGTTAAGATGGAAGATATCGCTCTAAGCGATCTTGGTACTGCTAAGAGCGTACGCATCACAAAAGACGC…
MRI_22_71	Caprine	UK		CGGATATCTTTCGCCTTACTTTGTTACAAATGCTGAAAAAATGCTGGTGGAATTTGAAAATCCATACATATTCCTTACTGAAAAGAAGATTAATCTTGTACAAAGCATTCTACCAATCTTAGAAAACGTTGCACGGTCTGGAAGGCCATTGCTCATCATAGCTGAAGACGTTGAAGGTGAAGCTCTGAGCACGCTTGTACTCAATAAGCTCCGTGGTGGCCTTCAAGTTGCTGCTGTAAAGGCGCCTGGTTTCGGTGACAGGAGAAAAGACATGCTTGGCGATATTGCTGTAATAGTAGGCGCTAAGTATGTAGTAAATGACGAGCTTGCTGTTAAGATGGAAGACATCGCTCTAAGCGATCTTGGTACTGCTAAGAGCGTACGCATCACAAAAGACGC…
MuisZw201	Rodentia	Sweden	3	ATACATATTCCTCACTGAAAAGAAGATTAATCTTGTACAAAGCATTCTACCAATATTAGAAAACGTTGCGAGAGCTGGGAGACCATTGCTCATTATAGCTGAAGACGTTGAAGGTGAAGCTCTGAGTACGCTTGTACTTAATAAGCTCCGTGGTGGGCTTCAAGTTGCTGCTGTAAAGGCACCTGGTTTCGGTGATAGAAGAAAGGACATGCTAGGCGATATTGCTGTAATAGTGGGCGCTAAGTATGTAGTAAATGATGAGCTTGCTGTTAAGATGGAAGATATCGCTCTAAGCGATTTGGGTACTGCTAAGAGCGTTCGCATTACAAAAGACGCGACTACTATTATCGGTAGTGTTGATAGCAGTTCC
MuisZw203	Rodentia	Sweden	3	GGATATCTTTCGCCTTACTTCGTTACAAATGCTGAAAAGATGCTTGTGGAATTTGAAAATCCATACATATTCCTCACTGAAAAGAAGATTAATCTTGTACAAAGCATTCTACCAATATTAGAAAACGTTGCGAGAGCTGGGAGACCATTGCTCATTATAGCTGAAGACGTTGAAGGTGAAGCTCTGAGTACGCTTGTACTTAATAAGCTCCGTGGTGGGCTTCAAGTTGCTGCTGTAAAGGCACCTGGTTTCGGTGATAGAAGAAAGGACATGCTAGGCGATATTGCTGTAATAGTGGGCGCTAAGTATGTAGTAAATGATGAGCTTGCTGTTAAGATGGAAGATATCGCTCTAAGCGATTTGGGTACTGCTAAGAGCGTTCGCATTACAAAAGACGCG…
MuisZw226	Rodentia	Sweden	3	ATATTCCTCACTGAAAAGAAGATTAATCTTGTACAAAGCATTCTACCAATATTAGAAAACGTTGCGAGAGCTGGGAGACCATTGCTCATTATAGCTGAAGACGTTGAAGGTGAAGCTCTGAGTACGCTTGTACTTAATAAGCTCCGTGGTGGGCTTCAAGTTGCTGCTGTAAAGGCACCTGGTTTCGGTGATAGAAGAAAGGACATGCTAGGCGATATTGCTGTAATAGTGGGCGCTAAGTATGTAGTAAATGATGAGCTTGCTGTTAAGATGGAAGATATCGCTCTAAGCGATTTGGGTACTGCTAAGAGCGTTCGCATTACAAAAGACGCGACTACTATTATCGGTAGTGTTGATAGCAGTTCC
MuisZw246	Rodentia	Sweden	4	ATATTCCTTACTGAAAAGAAGATTAATCTTGTACAGAGCATTTTACCAATATTAGAAAACGTTGCGAGAGCTGGTAGGCCATTGCTCATTATAGCTGAAGATGTTGAAGGTGAGGCTCTGAGCACACTTGTTCTAAATAGGCTACGTGGTGGGCTTCAAGTTGCTGCTGTGAAGGCGCCTGGTTTCGGTGATGGAAGGAAAGACATGCTAGGCGATATTGCTGTAATAGTAGGCGCTAAGTATGTAGTAAATGATGAGCTTGCTGTTAAGATGGAAGATATCGCTCTAAGCGATTTGGGTACTGCCAAGAGCGTGCGCATCACTAAAGACGCAACAACTATCATAGGTAGTGTTGATAGCAGTTCT
NW1earsxf11	Sorex araneus	Norway	3	GGATATCTTTCGCCTTACTTCGTTACAAATGCTGAAAAGATGCTTGTGGAATTTGAAAATCCATACATATTCCTCACTGAAAAGAAGATTAATCTTGTACAAAGCATTCTACCAATATTAGAAAACGTTGCGAGAGCTGGGAGACCATTGCTCATTATAGCTGAAGACGTTGAAGGTGAAGCTCTGAGTACGCTTGTACTTAATAAGCTCCGTGGTGGGCTTCAAGTTGCTGCTGTAAAGGCACCTGGTTTCGGTGATAGAAGAAAGGACATGCTAGGCGATATTGCTGTAATAGTGGGCGCTAAGTATGTAGTAAATGATGAGCTTGCTGTTAAGATGGAAGATATCGCTCTAAGCGATTTGGGTACTGCTAAGAGCGTTCGCATTACAAAAGACGCG…
NW57xd9	Cervus elaphus	Norway	1	GGATATCTTTCGCCTTACTTTGTTACAAATGCTGAAAAAATGCTGGTGGAATTTGAAAATCCATACATATTCCTTACTGAAAAGAAGATTAATCTTGTACAAAGCATTCTACCAATCTTAGAAAACGTTGCACGGTCTGGAAGACCATTGCTCATCATAGCTGAAGACGTTGAAGGTGAAGCTCTGAGCACGCTTGTACTCAATAAGCTCCGTGGTGGCCTTCAAGTTGCTGCTGTAAAGGCGCCTGGTTTCGGTGACAGAAGAAAAGACATGCTTGGCGATATTGCTGTAATAGTAGGTGCTAAGTATGTAGTAAATGACGAGCTTGCTGTTAAGATGGAAGATATCGCTCTAAGCGATTTGGGTACTGCTAAGAGCGTACGCATCACAAAAGACGCA…
NW5earsxg1	Sorex araneus	Norway	3	CTTGTGGAATTTGAAAATCCATACATATTCCTCACTGAAAAGAAGATTAATCTTGTACAAAGCATTCTACCAATATTAGAAAACGTTGCGAGAGCTGGGAGACCATTGCTCATTATAGCTGAAGACGTTGAAGGTGAAGCTCTGAGTACGCTTGTACTTAATAAGCTCCGTGGTGGGCTTCAAGTTGCTGCTGTAAAGGCACCTGGTTTCGGTGATAGAAGAAAGGACATGCTAGGCGATATTGCTGTAATAGTGGGCGCTAAGTATGTAGTAAATGATGAGCTTGCTGTTAAGATGGAAGATATCGCTCTAAGCGATTTGGGTACTGCTAAGAGCGTTCGCATTACAAAAGACGCGACTACTATTATCGGTAGTGTTGATAGCAGTTCCGAAAGCATA…
NW89xa3	Capreolus capreolus	Norway	2	GGATATCTTTCGCCTTACTTTGTTACAAATGCTGAAAAAATGCTGGTGGAATTTGAAAATCCATACATATTCCTTACTGAAAAGAAGATTAATCTTGTACAAAGCATTTTACCAATATTAGAAAACGTTGCGAGAGCTGGTAGACCATTGCTTATCATAGCTGAAGATGTTGAAGGTGAAGCTCTGAGCACGCTTGTACTCAATAAGCTCCGTGGTGGGCTTCAAGTTGCTGCTGTAAAGGCGCCTGGTTTCGGTGACAGAAGAAAAGACATGCTAGGCGATATTGCCGTAATAGTAGGCGCTAAGTATGTAGTAAATGACGAGCTTGCTGTTAAGATGGAAGATATCGCTCTAAGCGATCTTGGTACTGCTAAGAGCGTGCGCATCACAAAAGACGCA…
NW89xb1	Capreolus capreolus	Norway	2	GGATATCTTTCGCCTTACTTTGTTACAAATGCTGAAAAAATGCTGGTGGAATTTGAAAATCCATACATATTCCTTACTGAAAAGAAGATTAATCTTGTACAAAGCATTCTACCAATATTAGAAAACGTTGCGAGAGCTGGTAGACCATTGCTTATCATAGCTGAAGATGTTGAAGGTGAAGCTCTGAGCACGCTTGTACTCAATAAGCTCCGTGGTGGGCTTCAAGTTGCTGCTGTAAAGGCGCCTGGTTTCGGTGACAGAAGAAAAGACATGCTAGGCGATATTGCCGTAATAGTAGGCGCTAAGTATGTAGTAAATGACGAGCTTGCTGTTAAGATGGAAGATATCGCTCTAAGCGATCTTGGTACTGCTAAGAGCGTGCGCATCACAAAAGATGCA…
NW89xc1	Capreolus capreolus	Norway	2	GGATATCTTTCGCCTTACTTTGTTACAAATGCTGAAAAAATGCTGGTGGAATTTGAAAATCCATACATATTCCTTACTGAAAAGAAGATTAATCTTGTACAAAGCATTCTACCAATATTAGAAAACGTTGCGAGAGCTGGTAGACCATTGCTTATCATAGCTGAAGATGTTGAAGGTGAAGCTCTGAGCACGCTTGTACTCAATAAGCTCCGTGGTGGGCTTCAAGTTGCTGCTGTAAAGGCGCCTGGTTTCGGTGACAGAAGAAAAGACATGCTAGGCGATATTGCCGTAATAGTAGGCGCTAAGTATGTAGTAAATGACGAGCTTGCTGTTAAGATGGAAGATATCGCTCTAAGCGATCTTGGTACTGCTAAGAGCGTGCGCATCACAAAAGACGCA…
NW89xc3	Capreolus capreolus	Norway	2	GGATATCTTTCGCCTTACTTTGTTACAAATGCTGAAAAAATGCTGGTGGAATTTGAAAATCCATACATATTCCTTACTGAAAAGAAGATTAATCTTGTACAAAGCATTTTACCAATATTAGAAAACGTTGCGAGAGCTGGCAGACCATTGCTCATCATAGCTGAAGATGTTGAAGGTGAAGCTCTGAGCACGCTTGTACTCAATAAGCTCCGTGGTGGGCTTCAAGTTGCTGCTGTAAAGGCGCCTGGTTTCGGTGATAGAAGAAAAGACATGCTTGGCGATATTGCTGTAATAGTAGGCGCTAAGTATGTAGTAAATGACGAGCTTGCTGTTAAGATGGAAGATATCGCTCTAAGCGATCTTGGTACTGCTAAGAGCGTACGCATCACAAAAGACGCA…
NW89xd1	Capreolus capreolus	Norway	2	GGATATCTTTCGCCTTACTTTGTTACAAATGCTGAAAAAATGCTGGTGGAATTTGAAAATCCATACATATTCCTTACTGAAAAGAAGATTAATCTTGTACAAAGCATTTTACCAATATTAGAAAACGTTGCGAGAGCTGGCAGACCATTGCTCATCATAGCTGAAGATGTTGAAGGTGAAGCTCTGAGCACGCTTGTACTCAATAAGCTCCGTGGTGGGCTTCAAGTTGCTGCTGTAAAGGCGCCTGGTTTCGGTGACAGAAGAAAAGACATGCTAGGCGATATTGCCGTAATAGTAGGCGCTAAGTATGTAGTAAATGACGAGCTTGCTGTTAAGATGGAAGATATCGCTCTAAGCGATCTTGGTACTGCTAAGAGCGTGCGCATCACAAAAGACGCA…
NW89xf1	Capreolus capreolus	Norway	2	GGATATCTTTCGCCTTACTTTGTTACAAATGCTGAAAAAATGCTGGTGGAATTTGAAAATCCATACATATTCCTTACTGAAAAGAAGATTAATCTTGTACAAAGCATTTTACCAATATTAGAAAACGTTGCGAGAGCTGGTAGACCATTGCTTATCATAGCTGAAGATGTTGAAGGTGAAGCTCTGAGCACGCTTGTACTCAATAAGCTCCGTGGTGGGCTTCAAGTTGCTGCTGTAAAGGCGCCTGGTTTCGGTGACAGAAGAAAAGACATGCTAGGCGATATTGCCGTAATAGTAGGCGCTAAGTATGTAGTAAATGACGAGCTTGCTGTTAAGATGGAAGATATCGCTCTAAGCGATCTTGGTACTGCTAAGAGCGTGCGCATCACAAAAGACGCA…
NW91xb2	Alces alces	Norway	1	GGATATCTTTCGCCTTACTTTGTTACAAATGCTGAAAAAATGCTGGTGGAATTTGAAAATCCATACATATTCCTTACTGAAAAGAAGATTAATCTTGTACAAAGCATTCTACCAATCTTAGAAAACGTTGCACGGTCTGGAAGACCATTGCTCATCATAGCTGAAGACGTTGAAGGTGAAGCTCTGAGCACGCTTGTACTCAATAAGCTCCGTGGTGGCCTTCAAGTTGCTGCTGTAAAGGCGCCTGGCTTCGGTGACAGGAGAAAAGACATGCTTGGCGATATTGCTGTAATAGTAGGCGCTAAGTATGTAGTAAATGACGAGCTTGCTGTTAAGATGGAAGACATCGCTCTAAGCGATCTTGGTACTGCTAAGAGCGTACGCATCACAAAAGACGCA…
NW91xc3	Alces alces	Norway	1	GGATATCTTTCGCCTTACTTTGTTACAAATGCTGAAAAAATGCTGGTGGAATTTGAAAATCCATACATATTCCTTACTGAAAAGAAGATTAATCTTGTACAAAGCATTCTACCAATCTTAGAAAACGTTGCACGGTCTGGAAGACCATTGCTCATCATAGCTGAAGACGTTGAAGGTGAAGCTCTGAGCACGCTTGTACTCAATAAGCTACGTGGTGGCCTTCAAGTTGCTGCTGTAAAGGCGCCTGGTTTTGGTGACAGGAGAAAAGACATGCTTGGCGATATTGCTGTAATAGTAGGCGCTAAGTATGTAGTAAATGACGAGCTTGCTGTTAAGATGGAAGATATCGCTCTAAGCGATCTTGGTACTGCTAAGAGCGTACGCATCACAAAAGACGCA…
NW91xc5	Alces alces	Norway	1	TTGTTACAAATGCTGAAAAAATGCTGGTGGAATTTGAAAATCCATACATATTCCTTACTGAAAAGAAGATTAATCTTGTACAAAGCATTCTACCAATCTTAGAAAACGTTGCACGGTCTGGAAGGCCATTGCTCATCATAGCTGAAGACGTTGAAGGTGAAGCTCTTAGCACGCTTGTACTCAATAAGCTCCGTGGTGGCCTTCAAGTTGCTGCTGTAAAGGCGCCTGGTTTTGGTGACAGGAGAAAAGACATGCTTGGCGATATTGCTGTAATAGTAGGCGCTAAGTATGTAGTAAATGACGAGCTTGCTGTTAAGATGGAAGATATCGCTCTAAGCGATCTTGGTACTGCTAAGAGCGTACGCATCACAAAAGACGCAACTACTATCATAGGTAGTG…
NW91xd8	Alces alces	Norway	2	GGATATCTTTCGCCTTACTTTGTTACAAATGCTGAAAAAATGCTGGTGGAATTTGAAAATCCATACATATTCCTTACTGAAAAGAAGATTAATCTTGTACAAAGCATTTTACCAATATTAGAAAACGTTGCGAGAGCTGGTAGACCATTGCTTATCATAGCTGAAGATGTTGAAGGTGAAGCTCTGAGCACGCTTGTACTCAATAAGCTCCGTGGTGGGCTTCAAGTTGCTGCTGTAAAGGCGCCTGGTTTCGGTGACAGAAGAAAAGACATGCTAGGCGATATTGCCGTAATAGTAGGCGCTAAGTATGTAGTAAATGACGAGCTTGCTGTTAAGATGGAAGATATCGCTCTAAGCGATCTTGGTACTGCTAAGAGCGTGCGCATCACAAAAGACGCA…
NW91xe7	Alces alces	Norway	1	GGATATCTTTCGCCTTACTTTGTTACAAATGCTGAAAAAATGCTGGTGGAATTTGAAAATCCATACATATTCCTTACTGAAAAGAAGATTAATCTTGTACAAAGCATTCTACCAATCTTAGAAAACGTTGCACGGTCTGGAAGACCATTGCTCATCATAGCTGAAGACGTTGAAGGTGAAGCTCTGAGCACGCTTGTACTCAATAAGCTCCGTGGTGGCCTTCAAGTTGCTGCTGTGAAGGCGCCTGGTTTTGGTGACAGGAGAAAAGACATGCTTGGCGATATTGCTGTAATAGTAGGCGCTAAGTATGTAGTAAATGACGAGCTTGCTGTTAAGATGGAAGATATCGCTCTAAGCGATCTTGGTACTGCTAAGAGCGTACGCATCACAAAAGACGCA…
NW92xa3	Cervus elaphus	Norway	1	GGATATCTTTCGCCTTACTTTGTTACAAATGCTGAAAAAATGCTGGTGGAATTTGAAAATCCATACATATTCCTTACTGAAAAGAAGATTAATCTTGTACAAAGCATTCTACCAATCTTAGAAAACGTTGCACGGTCTGGAAGACCATTGCTCATCATAGCTGAAGACGTTGAAGGTGAAGCTCTGAGCACACTTGTACTCAATAAGCTCCGTGGTGGCCTTCAAGTTGCTGCTGTAAAGGCGCCTGGTTTTGGTGACAGGAGAAAAGACATGCTTGGCGATATTGCTGTAATAGTAGGCGCTAAGTATGTAGTAAATGACGAGCTTGCTGTTAAGATGGAAGATATCGCTCTAAGCGATCTTGGTACTGCTAAGAGCGTACGCATCACAAAAGACGCA…
NW92xb1	Cervus elaphus	Norway	1	GGATATCTTTCGCCTTACTTTGTTACAAATGCTGAAAAAATGCTGGTGGAATTTGAAAATCCATACATATTCCTTACTGAAAAGAAGATTAATCTTGTACAAAGCATTCTACCAATCTTAGAAAACGTTGCACGGTCTGGAAGACCATTGCTCATCATAGCTGAAGACGTTGAAGGTGAAGCTCTAAGCACGCTTGTACTCAATAAGCTCCGTGGTGGCCTTCAAGTTGCTGCTGTAAAGGCGCCTGGTTTCGGTGACAGGAGAAAAGACATGCTTGGTGATATTGCTGTAATAGTAGGCGCTAAGTATGTAGTAAATGACGAGCTTGCTGTTAAGATGGAAGACATCGCTCTAAGCGATCTTGGTACTGCTAAGAGCGTACGCATCACAAAAGACGCA…
NW92xb10	Cervus elaphus	Norway	1	GGATATCTTTCGCCTTACTTTGTTACAAATGCTGAAAAAATGCTGGTGGAATTTGAAAATCCATACATATTCCTTACTGAAAAGAAGATTAATCTTGTACAAAGCATTCTACCAATCTTAGAAAACGTTGCACGGTCTGGAAGGCCATTGCTCATCATAGCTGAAGACGTTGAAGGTGAAGCTCTTAGCACGCTTGTACTCAATAAGCTCCGTGGTGGCCTTCAAGTTGCTGCTGTAAAGGCGCCTGGTTTTGGTGACAGGAGAAAAGACATGCTTGGCGATATTGCTGTAATAGTAGGCGCTAAGTATGTAGTAAATGACGAGCTTGCTGTTAAGATGGAAGATATCGCTCTAAGCGATCTTGGTACTGCTAAGAGCGTACGCATCACAAAAGACGCA…
NW92xc6	Cervus elaphus	Norway	1	GGATATCTTTCGCCTTACTTTGTTACAAATGCTGAAAAAATGCTGGTGGAATTTGAAAATCCATACATATTCCTTACTGAAAAGAAGATTAATCTTGTACAAAGCATTCTACCAATCTTAGAAAACGTTGCACGGTCTGGAAGACCATTGCTCATCATAGCTGAAGACGTTGAAGGTGAAGCTCTGAGCACGCTTGTACTCAATAAGCTCCGTGGTGGCCTTCAAGTTGCTGCTGTAAAGGCGCCTGGTTTCGGTGACAGAAGAAAAGACATGCTTGGCGATATTGCTGTAATAGTAGGTGCTAAGTATGTAGTAAATGACGAGCTTGCTGTTAAGATGGAAGATATCGCTCTAAGCGATTTGGGTACTGCTAAGAGCGTACGCATCACAAAAGACTCA…
NW92xd9	Cervus elaphus	Norway	1	GGATATCTTTCGCCTTACTTTGTTACAAATGCTGAAAAAATGCTGGTGGAATTTGAAAATCCATACATATTCCTTACTGAAAAGAAGATTAATCTTGTACAAAGCATTCTACCAATCTTAGAAAACGTTGCACGGTCTGGAAGACCATTGCTCATCATAGCTGAAGACGTTGAAGGTGAAGCTCTGAGCACGCTTGTACTCAATAAGCTCCGTGGTGGCCTTCAAGTTGCTGCTGTAAAGGCGCCTGGTTTCGGTGATAGAAGAAAAGACATGCTTGGCGATATTGCTGTAATAGTAGGCGCTAAGTATGTAGTAAATGACGAGCTTGCTGTTAAGATGGAAGATATCGCTCTAAGCGATCTTGGTACTGCTAAGAGCGTACGCATCACAAAAGACGCA…
NW92xe1	Cervus elaphus	Norway	1	GGATATCTTTCGCCTTACTTTGTTACAAATGCTGAAAAAATGCTGGTGGAATTTGAAAATCCATACATATTCCTTACTGAAAAGAAGATTAATCTTGTACAAAGCATTCTACCAATCTTAGAAAACGTTGCACGGTCTGGAAGACCATTGCTCATCATAGCTGAAGACGTTGAAGGTGAAGCTCTTAGCACGCTTGTACTCAATAAGCTCCGTGGTGGCCTTCAAGTTGCTGCTGTAAAGGCGCCTGGTTTTGGTGACAGAAGAAAAGACATGCTTGGCGATATTGCTGTAATAGTAGGCGCTAAGTATGTAGTAAATGACGAGCTTGCTGTTAAGATGGAAGATATCGCTCTAAGCGATCTTGGTACTGCTAAGAGCGTACGCATCACAAAAGACGCA…
NW92xf8	Cervus elaphus	Norway	1	TTACTTTGTTACAAATGCTGAAAAAATGCTGGTGGAATTTGAAAATCCATACATATTCCTTACTGAAAAGAAGATTAATCTTGTACAAAGCATTCTACCAATCTTAGAAAACGTTGCACGGTCTGGAAGACCATTGCTCATCATAGCTGAAGACGTTGAAGGTGAAGCTCTGAGCACGCTTGTACTCAATAAGCTCCGTGGTGGCCTTCAAGTTGCTGCTGTAAAGGCGCCTGGTTTCGGTGACAGGAGAAAAGACATGCTTGGCGATATTGCTGTAATAGTAGGCGCTAAGTATGTAGTAAATGACGAGCTTGCTGTTAAGATGGAAGACATCGCTCTAAGCGATCTTGGTACTGCTAAGAGCGTACGCATCACAAAAGACGCAACTACTATCATAGG…
NW92xf9	Cervus elaphus	Norway	1	TTACTTTGTTACAAATGCTGAAAAAATGCTGGTGGAATTTGAAAATCCATACATATTCCTTACTGAAAAGAAGATTAATCTTGTACAAAGCATTCTACCAATCTTAGAAAACGTTGCACGGTCTGGAAGACCATTGCTCATCATAGCTGAAGACGTTGAAGGTGAAGCTCTTAGCACGCTTGTACTCAATAAGCTCCGTGGTGGCCTTCAAGTTGCTGCTGTAAAGGCGCCTGGTTTTGGTGACAGGAGAAAAGACATGCTTGGCGATATTGCTGTAATAGTAGGCGCTAAGTATGTAGTAAATGACGAGCTTGCTGTTAAGATGGAAGATATCGCTCTAAGCGATCTTGGTACTGCTAAGAGCGTACGCATCACAAAAGACGCAACTACTATCATAGG…
NW92xg7	Cervus elaphus	Norway	1	GGATATCTTTCGCCTTACTTTGTTACAAATGCTGAAAAAATGCTGGTGGAATTTGAAAATCCATACATATTCCTTACTGAAAAGAAGATTAATCTTGTACAAAGCATTCTACCAATCTTAGAAAACGTTGCACGGTCTGGAAGACCATTGCTCATCATAGCCGAAGACGTTGAAGGTGAAGCTCTGAGCACGCTTGTACTCAATAAGCTCCGTGGTGGCCTTCAAGTTGCTGCTGTAAAGGCGCCTGGTTTTGGTGACAGGAGAAAAGACATGCTTGGCGATATTGCTGTAATAGTAGGCGCTAAGTATGTAGTAAATGACGAGCTTGCTGTTAAGATGGAAGATATCGCTCTAAGCGATCTTGGTACTGCTAAGAGCGTACGCATCACAAAAGACGCA…
NW92xh5	Cervus elaphus	Norway	1	GGATATCTTTCGCCTTACTTTGTTACAAATGCTGAAAAAATGCTGGTGGAATTTGAAAATCCATACATATTCCTTACTGAAAAGAAGATTAATCTTGTACAAAGCATTCTACCAATCTTAGAAAACGTTGCACGGTCTGGAAGACCATTGCTCATCATAGCTGAAGACGTTGAAGGTGAAGCTCTGAGCACGCTTGTACTCAATAAGCTCCGTGGTGGCCTTCAAGTTGCTGCTGTAAAGGCGCCTGGTTTTGGTGACAGGAGAAAAGACATGCTTGGCGATATTGCTGTAATAGTAGGCGCTAAGTATGTAGTAAATGACGAGCTTGCTGTTAAGATGGAAGATATCGCTCTAAGCGATCTTGGTACTGCTAAGAGCGTACGCATCACAAAAGACGCA…
NW93xa12	Cervus elaphus	Norway	1	GGATATCTTTCGCCTTACTTTGTTACAAATGCTGAAAAAATGCTGGTGGAATTTGAAAATCCATACATATTCCTTACTGAAAAGAAGATTAATCTTGTACAAAGCATTCTACCAATCTTAGAAAACGTTGCACGGTCTGGAAGACCATTGCTCATCATAGCTGAAGACGTTGAAGGTGAAGCTCTGAGCACGCTTGTACTCAATAAGCTCCGTGGTGGCCTTCAAGTTGCTGCTGTAAAGGCGCCTGGTTTTGGTGACAGGAGAAAAGACATGCTTGGCGATATTGCTGTAATAGTAGGCGCTAAGTATGTAGTAAATGACGAGCTTGCTGTTAAGATGGAAGATATCGCTCTAAGCGATCTTGGTACTGCTAAGAGCGTACGCATCACAAAAGACGCA…
NW93xa6	Alces alces	Norway	1	GGATATCTTTCGCCTTACTTTGTTACAAATGCTGAAAAAATGCTGGTGGAATTTGAAAATCCATACATATTCCTTACTGAAAAGAAGATTAATCTTGTACAAAGCATTCTACCAATCTTAGAAAACGTTGCACGGTCTGGAAGACCATTGCTCATCATAGCTGAAGACGTTGAAGGTGAAGCTCTGAGCACACTTGTACTCAATAAGCTCCGTGGTGGCCTTCAAGTTGCTGCTGTAAAGGCGCCTGGTTTTGGTGACAGGAGAAAAGACATGCTTGGCGATATTGCTGTAATAGTAGGCGCTAAGTATGTAGTAAATGACGAGCTTGCTGTTAAGATGGAAGATATCGCTCTAAGCGATCTTGGTACTGCTAAGAGCGTACGCATCACAAAAGACGCA…
NW93xa8	Alces alces	Norway	2	GGATATCTTTCGCCTTACTTTGTTACAAATGCTGAAAAAATGCTGGTGGAATTTGAAAATCCATACATATTCCTTACTGAAAAGAAGATTAATCTTGTACAAAGCATTTTACCAATATTAGAAAACGTTGCGAGAGCTGGCAGACCATTGCTCATCATAGCTGAAGATGTTGAAGGTGAAGCTCTGAGCACGCTTGTACTCAATAAGCTCCGTGGTGGGCTTCAAGTTGCTGCTGTAAAGGCGCCTGGTTTCGGTGATAGAAGAAAAGACATGCTTGGCGATATTGCTGTAATAGTAGGCGCTAAGTATGTAGTAAATGACGAGCTTGCTGTTAAGATGGAAGATATCGCTCTAAGCGATCTTGGTACTGCTAAGAGCGTACGCATCACAAAAGACGCA…
NW93xb6	Alces alces	Norway	1	GGATATCTTTCGCCTTACTTTGTTACAAATGCTGAAAAAATGCTGGTGGAATTTGAAAATCCATACATATTCCTTACTGAAAAGAAGATTAATCTTGTACAAAGCATTCTACCAATCTTAGAAAACGTTGCACGGTCTGGAAGACCATTGCTCATCATAGCTGAAGACGTTGAAGGTGAAGCTCTTAGCACGCTTGTACTCAATAAGCTCCGTGGTGGCCTTCAAGTTGCTGCTGTAAAGGCGCCTGGTTTTGGTGACAGGAGAAAAGACATGCTTGGCGATATTGCTGTAATAGTAGGCGCTAAGTATGTAGTAAATGACGAGCTTGCTGTTAAGATGGAAGATATCGCTCTAAGCGATCTTGGTACTGCTAAGAGCGTACGCATCACAAAAGACGCA…
NW93xc3	Alces alces	Norway	1	GGATATCTTTCGCCTTACTTTGTTACAAATGCTGAAAAAATGCTGGTGGAATTTGAAAATCCATACATATTCCTTACTGAAAAGAAGATTAATCTTGTACAAAGCATTCTACCAATCTTAGAAAACGTTGCACGGTCTGGAAGACCATTGCTCATCATAGCTGAAGACGTTGAAGGTGAAGCTCTGAGCACGCTTGTACTCAATAAGCTCCGTGGTGGCCTTCAAGTTGCTGCTGTAAAGGCGCCTGGTTTTGGTGACAGGAGAAAAGACATGCTTGGCGATATTGCTGTAATAGTAGGCGCTAAGTATGTAGTAAATGACGAGCTTGCTGTTAAGATGGAAGATATCGCTCTAAGCGATCTTGGTACTGCTAAGAGCGTACGCATCACAAAAGACGCG…
NW93xc9	Alces alces	Norway	2	GGATATCTTTCGCCTTACTTTGTTACAAATGCTGAAAAAATGCTGGTGGAATTTGAAAATCCATACATATTCCTTACTGAAAAGAAGATTAATCTTGTACAAAGCATTCTACCAATATTAGAAAACGTTGCGAGAGCTGGTAGACCATTGCTTATCATAGCTGAAGATGTTGAAGGTGAAGCTCTGAGCACGCTTGTACTCAATAAGCTCCGTGGTGGGCTTCAAGTTGCTGCTGTAAAGGCGCCTGGTTTCGGTGACAGAAGAAAAGACATGCTAGGCGATATTGCCGTAATAGTAGGCGCTAAGTATGTAGTAAATGACGAGCTTGCTGTTAAGATGGAAGATATCGCTCTAAGCGATCTTGGTACTGCTAAGAGCGTACGCATCACAAAAGACGCA…
NW93xd12	Cervus elaphus	Norway	1	GGATATCTTTCGCCTTACTTTGTTACAAATGCTGAAAAAATGCTGGTGGAATTTGAAAATCCATACATATTCCTTACTGAAAAGAAGATTAATCTTGTACAAAGCATTCTACCAATCTTAGAAAACGTTGCACGGTCTGGAAGACCATTGCTCATCATAGCTGAAGACGTTGAAGGTGAAGCTCTTAGCACGCTTGTACTCAATAAGCTCCGTGGTGGCCTTCAAGTTGCTGCTGTAAAGGCGCCTGGTTTTGGTGACAGGAGAAAAGACATGCTTGGCGATATTGCTGTAATAGTAGGCGCTAAGTATGTAGTAAATGACGAGCTTGCTGTTAAGATGGAAGACATCGCTCTAAGCGATCTTGGTACTGCTAAGAGCGTACGCATCACAAAAGACGCA…
NW93xd5	Cervus elaphus	Norway	1	GGATATCTTTCGCCTTACTTTGTTACAAATGCTGAAAAAATGCTGGTGGAATTTGAAAATCCATACATATTCCTTACTGAAAAGAAGATTAATCTTGTACAAAGCATTCTACCAATCTTAGAAAACGTTGCACGGTCTGGAAGACCATTGCTCATCATAGCTGAAGACGTTGAAGGTGAAGCTCTGAGCACGCTTGTACTCAATAAGCTCCGTGGTGGCCTTCAAGTTGCTGCTGTAAAGGCGCCTGGTTTCGGTGACAGGAGAAAAGACATGCTTGGTGATATTGCTGTAATAGTAGGCGCTAAGTATGTAGTAAATGACGAGCTTGCTGTTAAGATGGAAGACATCGCTCTAAGCGATCTTGGTACTGCTAAGAGCGTACGTATCACAAAAGACGCA…
NW93xd7	Alces alces	Norway	2	GGATATCTTTCGCCTTACTTTGTTACAAATGCTGAAAAAATGCTGGTGGAATTTGAAAATCCATACATATTCCTTACTGAAAAGAAGATTAATCTTGTACAAAGCATTTTACCAATATTAGAAAACGTTGCGAGAGCTGGCAGACCATTGCTCATCATAGCTGAAGATGTTGAAGGTGAAGCTCTGAGCACGCTTGTACTCAATAAGCTCCGTGGTGGGCTTCAAGTTGCTGCTGTAAAGGCGCCTGGTTTCGGTGATAGAAGAAAAGACATGCTAGGCGATATTGCCGTAATAGTAGGCGCTAAGTATGTAGTAAATGACGAGCTTGCTGTTAAGATGGAAGATATCGCTCTAAGCGATCTTGGTACTGCTAAGAGCGTGCGTATCACAAAAGACGCA…
NW93xg8	Alces alces	Norway	1	GGATATCTTTCGCCTTACTTTGTTACAAATGCTGAAAAAATGCTGGTGGAATTTGAAAATCCATACATATTCCTTACTGAAAAGAAGATTAATCTTGTACAAAGCATTCTACCAATCTTAGAAAACGTTGCACGGTCTGGAAGACCATTGCTCATCATAGCTGAAGATGTTGAAGGTGAAGCTCTGAGCACGCTTGTACTCAATAAGCTCCGTGGTGGCCTTCAAGTTGCTGCTGTAAAGGCGCCTGGTTTTGGTGACAGGAGAAAAGACATGCTTGGCGATATTGCTGTAATAGTAGGCGCTAAGTATGTAGTAAATGACGAGCTTGCTGTTAAGATGGAAGATATCGCTCTAAGCGATCTTGGTACTGCTAAGAGCGTACGCATCACAAAAGACGCA…
NW94xc5	Alces alces	Norway	1	GGATATCTTTCGCCTTACTTTGTTACAAATGCTGAAAAAATGCTGGTGGAATTTGAAAATCCATACATATTCCTTACTGAAAAGAAGATTAATCTTGTACAAAGCATTCTACCAATCTTAGAAAACGTTGCACGGTCTGGAAGACCATTGCTCATCATAGCTGAAGACGTTGAAGGTGAAGCTCTTAGCACGCTTGTACTCAATAAGCTCCGTGGTGGCCTTCAAGTTGCTGCTGTAAAGGCGCCTGGTTTTGGTGACAGGAGAAAAGACATGCTTGGCGATATTGCTGTAATAGTAGGCGCTAAGTATGTAGTAAATGACGAGCTTGCTGTTAAGATGGAAGATATCGCTCTAAGCGATCTTGGTACTGCTAAGAGCGTACGCATCACAAAAGACGCA…
NW94xd1	Cervus elaphus	Norway	1	GGATATCTTTCGCCTTACTTTGTTACAAATGCTGAAAAAATGCTGGTGGAATTTGAAAATCCATACATATTCCTTACTGAAAAGAAGATTAATCTTGTACAAAGCATTCTACCAATCTTAGAAAACGTTGCACGGTCTGGAAGGCCATTGCTCATCATAGCTGAAGACGTTGAAGGTGAAGCTCTGAGCACGCTTGTACTCAATAAGCTCCGTGGTGGCCTTCAAGTTGCTGCTGTAAAGGCGCCTGGTTTTGGTGACAGGAGAAAAGACATGCTTGGCGATATTGCTGTAATAGTAGGCGCTAAGTATGTAGTAAATGACGAGCTTGCTGTTAAGATGGAAGATATCGCTCTAAGCGATCTTGGTACTGCTAAGAGCGTACGCATCACAAAAGACGCA…
NW94xe2	Cervus elaphus	Norway	1	GGATATCTTTCGCCTTACTTTGTTACAAATGCTGAAAAAATGCTGGTGGAATTTGAAAATCCATACATATTCCTTACTGAAAAGAAGATTAATCTTGTACAAAGCATTCTACCAATCTTAGAAAACGTTGCGCGGTCTGGAAGACCATTGCTCATCATAGCTGAAGACGTTGAAGGTGAAGCTCTGAGCACGCTTGTACTCAATAAGCTCCGTGGTGGCCTTCAAGTTGCTGCTGTAAAGGCTCCTGGTTTCGGTGACAGAAGAAAAGACATGCTTGGCGATATTGCTGTAATAGTAGGCGCTAAGTATGTAGTAAATGACGAGCTTGCTGTTAAGATGGAAGATATCGCTCTAAGCGATCTTGGTACTGCTAAGAGCGTACGCATCACAAAAGACGCA…
NW94xg3	Cervus elaphus	Norway	1	GGATATCTTTCGCCTTACTTTGTTACAAATGCTGAAAAAATGCTGGTGGAATTTGAAAATCCATACATATTCCTTACTGAAAAGAAGATTAATCTTGTACAAAGCATTCTACCAATCTTAGAAAACGTTGCACGGTCTGGAAGACCATTGCTCATCATAGCTGAAGACGTTGAAGGTGAAGCTCTGAGCACGCTTGTACTCAATAAGCTCCGTGGTGGCCTTCAAGTTGCTGCTGTAAAGGCGCCTGGTTTCGGTGACAGGAGAAAAGACATGCTTGGTGATATTGCTGTAATAGTAGGCGCTAAGTATGTAGTAAATGACGAGCTTGCTGTTAAGATGGAAGACATCGCTCTAAGCGATCTTGGTACTGCTAAGAGCGTACGCATCACAAAAGACGCA…
PWN19fd	Dama dama	Netherlands	1	GGATATCTTTCGCCTTACTTTGTTACAAATGCTGAAAAAATGCTGGTGGAATTTGAAAATCCATACATATTCCTTACTGAAAAGAAGATTAATCTTGTACAAAGCATTCTACCAATCTTAGAAAACGTTGCACGGTCTGGAAGACCATTGCTCATCATAGCTGAAGACGTTGAAGGTGAAGCTCTGAGCACACTTGTACTCAATAAGCTCCGTGGTGGCCTTCAAGTTGCTGCTGTAAAGGCGCCTGGTTTTGGTGACAGGAGAAAAGACATGCTTGGCGATATTGCTGTAATAGTAGGCGCTAAGTATGTAGTAAATGACGAGCTTGCTGTTAAGATGGAAGATATCGCTCTAAGCGATCTTGGTACTGCTAAGAGCGTACGCATCACAAAAGACGCA…
PWN27fd	Dama dama	Netherlands	1	GGATATCTTTCGCCTTACTTTGTTACAAATGCTGAAAAAATGCTGGTGGAATTTGAAAATCCATACATATTCCTTACTGAAAAGAAGATTAATCTTGTACAAAGCATTCTACCAATCTTAGAAAACGTTGCACGGTCTGGAAGACCATTGCTCATCATAGCTGAAGACGTTGAAGGTGAAGCTCTGAGCACGCTTGTACTCAATAAGCTCCGTGGTGGCCTTCAAGTTGCTGCTGTAAAGGCGCCTGGTTTCGGTGACAGGAGAAAAGACATGCTTGGCGATATTGCTGTAATAGTAGGCGCTAAGTATGTAGTAAATGACGAGCTTGCTGTTAAGATGGAAGATATCGCTCTAAGCGATCTTGGTACTGCTAAGAGCGTACGCATCACAAAAGACGCA…
ree41	Capreolus capreolus	Netherlands	2	TCTTTCGCCTTACTTTGTTACAAATGCTGAAAAAATGCTGGTGGAATTTGAAAATCCATACATATTCCTTACTGAAAAGAAGATTAATCTTGTACAAAGCATTCTACCAATATTAGAAAACGTTGCGAGAGCTGGTAGACCATTGCTTATCATAGCTGAAGATGTTGAAGGTGAAGCTCTGAGCACGCTTGTACTCAATAAGCTCCGTGGTGGGCTTCAAGTTGCTGCTGTAAAGGCGCCTGGTTTCGGTGACAGAAGAAAAGACATGCTAGGCGATATTGCCGTAATAGTAGGCGCTAAGTATGTAGTAAATGACGAGCTTGCTGTTAAGATGGAAGATATCGCTCTAAGCGATCTTGGTACTGCTAAGAGCGTGCGCATCACAAAAGACGCAACTAC…
ree43	Capreolus capreolus	Netherlands	2	TGATCGCGGATATCTTTCGCCTTACTTTGTTACAAATGCTGAAAAAATGCTGGTGGAATTTGAAAATCCATACATATTCCTTACTGAAAAGAAGATTAATCTTGTACAAAGCATTTTACCAATATTAGAAAACGTTGCGAGAGCTGGTAGACCATTGCTTATCATAGCTGAAGATGTTGAAGGTGAAGCTCTGAGCACGCTTGTACTCAATAAGCTCCGTGGTGGGCTTCAAGTTGCTGCTGTAAAGGCGCCTGGTTTCGGTGACAGAAGAAAAGACATGCTAGGCGATATTGCCGTAATAGTAGGCGCTAAGTATGTAGTAAATGACGAGCTTGCTGTTAAGATGGAAGATATCGCTCTAAGCGATCTTGGTACTGCTAAGAGCGTGCGCATCACAAA…
ree45	Capreolus capreolus	Netherlands	2	GGTATGCAGTTTGATCGCGGATATCTTTCGCCTTACTTTGTTACAAATGCTGAAAAAATGCTGGTGGAATTTGAAAATCCATACATATTCCTTACTGAAAAGAAGATTAATCTTGTACAAAGCATTCTACCAATATTAGAAAACGTTGCGAGAGCTGGTAGACCATTGCTTATCATAGCTGAAGATGTTGAAGGTGAAGCTCTGAGCACGCTTGTACTCAATAAGCTCCGTGGTGGGCTTCAAGTTGCTGCTGTAAAGGCGCCTGGTTTCGGTGACAGAAGAAAAGACATGCTAGGCGATATTGCCGTAATAGTAGGCGCTAAGTATGTAGTAAATGACGAGCTTGCTGTTAAGATGGAAGATATCGCTCTAAGCGATCTTGGTACTGCTAAGAGCGTG…
ree46	Capreolus capreolus	Netherlands	2	GGTATGCAGTTTGATCGCGGATATCTTTCGCCTTACTTTGTTACAAATGCTGAAAAAATGCTGGTGGAATTTGAAAATCCATACATATTCCTTACTGAAAAGAAGATTAATCTTGTACAAAGCATTCTACCAATATTAGAAAACGTTGCGAGAGCTGGTAGACCATTGCTTATCATAGCTGAAGATGTTGAAGGTGAAGCTCTGAGCACGCTTGTACTCAATAAGCTCCGTGGTGGGCTTCAAGTTGCTGCTGTAAAGGCGCCTGGTTTCGGTGACAGAAGAAAAGACATGCTAGGCGATATTGCCGTAATAGTAGGCGCTAAGTATGTAGTAAATGACGAGCTTGCTGTTAAGATGGAAGATATCGCTCTAAGCGATCTTGGTACTGCTAAGAGCGTG…
ReljaCham37D	Rupicapra rupicapra	Croatia	1	ATATTCCTCACTGAAAAGAAGATTAATCTTGTACAAAGCATTCTACCAATCTTAGAAAACGTTGCACGGTCTGGAAGACCATTGCTCATCATAGCTGAAGACGTTGAAGGTGAAGCTCTGAGCACGCTTGTACTCAATAAGCTCCGTGGTGGCCTTCAAGTTGCTGCTGTAAAGGCGCCTGGTTTCGGTGACAGAAGAAAGGACATGCTTGGCGATATTGCTGTAATAGTAGGCGCTAAGTATGTGGTAAATGACGAGCTTGCTGTTAAGATGGAAGATATCGCTCTAAGCGATTTGGGTACTGCTAAGAGCGTTCGCATCACAAAAGACGCAACTACTATCATAGGTAGTGTTGATAGCAGTTCT
ReljaCham41D	Rupicapra rupicapra	Croatia	1	ATATTCCTCACTGAAAAGAAGATTAATCTTGTACAAAGCATTCTACCAATCTTAGAAAACGTTGCACGGTCTGGAAGACCATTGCTCATCATAGCTGAAGACGTTGAAGGTGAAGCTCTGAGCACGCTTGTACTCAATAAGCTCCGTGGTGGCCTTCAAGTTGCTGCTGTAAAGGCGCCTGGTTTCGGTGACAGAAGAAAGGACATGCTAGGCGATATTGCTGTAATAGTAGGCGCTAAGTATGTAGTAAATGACGAGCTTGCTGTTAAGATGGAAGATATCGCTCTAAGCGATTTGGGTACTGCTAAGAGCGTTCGCATCACAAAAGACGCAACTACTATCATAGGTAGTGTTGATAGCAGTTCT
ReljaCham43D	Rupicapra rupicapra	Croatia	1	ATATTCCTCACTGAAAAGAAGATTAATCTTGTACAAAGCATTCTACCAATCTTAGAAAACGTTGCACGGTCTGGAAGACCATTGCTCATCATAGCTGAAGACGTTGAAGGTGAAGCTCTGAGCACGCTTGTACTCAATAAGCTCCGTGGTGGCCTTCAAGTTGCTGCTGTAAAGGCGCCTGGTTTCGGTGACAGAAGAAAGGACATGCTTGGCGATATTGCTGTAATAGTAGGCGCTAAGTATGTGGTAAATGACGAGCTTGCTGTTAAGATGGAAGATATCGCTCTAAGCGATTTGGGTACTGCTAAGAGCGTTCGCATCACAAAAGACGCTACTACTATCATAGGTAGTGTTGATAGCAGTTCT
ReljaDeerSJ105	Cervus elaphus	Croatia	1	ATATTCCTTACTGAAAAGAAGATTAATCTTGTACAAAGCATTCTACCAATCTTAGAAAACGTTGCACGGTCTGGAAGACCATTGCTCATCATAGCTGAAGACGTTGAAGGTGAAGCTCTGAGCACGCTTGTACTCAATAAGCTCCGTGGTGGCCTTCAAGTTGCTGCTGTAAAGGCGCCTGGTTTTGGTGACAGGAGAAAAGACATGCTTGGCGATATTGCTGTAATAGTAGGCGCTAAGTATGTAGTAAATGACGAGCTTGCTGTTAAGATGGAAGATATCGCTCTAAGCGATCTTGGTACTGCTAAGAGCGTACGCATCACAAAAGACGCAACTACTATCATAGGCAGTGTTGATAGCAGTTCT
ReljaDeerSJ124	Cervus elaphus	Croatia	2	ATATTCCTTACTGAAAAGAAGATTAATCTTGTACAAAGCATTCTACCAATATTAGAAAACGTTGCGAGAGCTGGTAGACCATTGCTTATCATAGCTGAAGATGTTGAAGGTGAAGCTCTGAGCACGCTTGTACTCAATAAGCTCCGTGGTGGGCTTCAAGTTGCTGCTGTAAAGGCGCCTGGTTTCGGTGACAGAAGAAAAGACATGCTAGGCGATATTGCCGTAATAGTAGGCGCTAAGTATGTAGTAAATGACGAGCTTGCTGTTAAGATGGAAGATATCGCTCTAAGCGATCTTGGTACTGCTAAGAGCGTGCGCATCACAAAAGACGCAACTACTATTATAGGTAGTGTTGATAGCAGTTCT
ReljaDeerSJ125	Cervus elaphus	Croatia	1	ATATTCCTTACTGAAAAGAAGATTAATCTTGTACAAAGCATTCTACCAATCTTAGAAAACGTTGCACGGTCTGGAAGACCATTGCTCATCATAGCTGAAGACGTTGAAGGTGAAGCTCTGAGCACGCTTGTACTCAATAAGCTCCGTGGTGGCCTTCAAGTTGCTGCTGTAAAGGCGCCTGGTTTCGGTGACAGAAGAAAAGACATGCTTGGCGATATTGCTGTAATAGTAGGTGCTAAGTATGTAGTAAATGACGAGCTTGCTGTTAAGATGGAAGATATCGCTCTAAGCGATTTGGGTACTGCTAAGAGCGTACGTATCACAAAAGACGCAACTACTATCATAGGTAGTGTTGATAGCAGTTCT
ReljaDeerSJ39	Capreolus capreolus	Croatia	1	ATATTCCTTACTGAAAAGAAGATTAATCTTGTACAAAGCATTCTACCAATCTTAGAAAACGTTGCACGGTCTGGAAGACCATTGCTCATCATAGCTGAAGACGTTGAAGGTGAAGCTCTGAGCACGCTTGTACTCAATAAGCTCCGTGGTGGCCTTCAAGTTGCTGCTGTAAAGGCGCCTGGTTTCGGTGACAGGAGAAAAGACATGCTTGGCGATATTGCTGTAATAGTAGGCGCTAAGTATGTAGTAAATGACGAGCTTGCTGTTAAGATGGAAGATATCGCTCTAAGCGATCTTGGTACTGCTAAGAGCGTACGCATCACAAAAGACGCAACTACTATCATAGGTAGTGTTGATAGCAGTTCT
ReljaDeerSJ69	Capreolus capreolus	Croatia	1	ATATTCCTTACTGAAAAGAAGATTAATCTTGTACAAAGCATTCTACCAATCTTAGAAAACGTTGCGCGGTCTGGAAGACCATTGCTCATCATAGCTGAAGACGTTGAAGGTGAAGCTCTGAGCACGCTTGTACTCAATAAGCTCCGTGGTGGCCTTCAAGTTGCTGCTGTAAAGGCGCCTGGTTTCGGTGATAGAAGAAAAGACATGCTTGGCGATATTGCTGTAATAGTAGGCGCTAAGTATGTAGTAAATGACGAGCTTGCTGTTAAGATGGAAGATATCGCTCTAAGCGATCTTGGTACTGCTAAGAGCGTACGCATCACAAAAGACGCAACTACTATCATAGGTAGTGTTGATAGCAGTTCT
ReljaDeerSJ87	Cervus elaphus	Croatia	2	ATATTCCTTACTGAAAAGAAGATTAATCTTGTACAAAGCATTTTACCAATATTAGAAAACGTTGCGAGAGCTGGTAGACCATTGCTTATCATAGCTGAAGATGTTGAAGGTGAAGCTCTGAGCACGCTTGTACTCAATAAGCTCCGTGGTGGGCTTCAAGTTGCTGCTGTAAAGGCGCCTGGTTTCGGTGACAGAAGAAAAGACATGCTAGGCGATATTGCCGTAATAGTAGGCGCTAAGTATGTAGTAAATGACGAGCTTGCTGTTAAGATGGAAGATATCGCTCTAAGCGATCTTGGTACTGCTAAGAGCGTGCGCATCACAAAAGACGCAACTACTATTATAGGTAGTGTTGATAGCAGTTCT
ReljaDeerSJ93	Cervus elaphus	Croatia	2	ATATTCCTTACTGAAAAGAAGATTAATCTTGTACAAAGCATTCTACCAATATTAGAAAACGTTGCGAGAGCTGGTAGACCATTGCTTATCATAGCTGAAGATGTTGAAGGTGAAGCTCTGAGCACGCTTGTACTCAATAAGCTCCGTGGTGGGCTTCAAGTTGCTGCTGTAAAGGCGCCTGGTTTCGGTGACAGAAGAAAAGACATGCTAGGCGATATTGCCGTAATAGTAGGCGCTAAGTATGTAGTAAATGACGAGCTTGCTGTTAAGATGGAAGATATCGCTCTAAGCGATCTTGGTACTGCTAAGAGCGTGCGCATCACAAAAGACGCAACTACTATCATAGGTAGTGTTGATAGCAGTTCT
ReljaMUF11	Ovis musimon	Croatia	1	ATATTCCTTACTGAAAAGAAGATTAATCTTGTACAAAGCATTCTACCAATCTTAGAAAACGTTGCACGGTCTGGAAGGCCATTGCTCATCATAGCTGAAGACGTTGAAGGTGAAGCTCTGAGCACACTTGTACTCAATAAGCTCCGTGGTGGCCTTCAAGTTGCTGCTGTAAAGGCGCCTGGTTTTGGTGACAGGAGAAAAGACATGCTTGGCGATATTGCTGTAATAGTAGGCGCTAAGTATGTAGTAAATGACGAGCTTGCTGTTAAGATGGAAGATATTGCTCTAAGCGATCTTGGTACTGCTAAGAGCGTACGCATCACAAAAGACGCAACTACTATCATAGGTAGTGTTGATAGCAGTTCT
ReljaMUF19	Ovis musimon	Croatia	1	ATATTCCTCACTGAAAAGAAGATTAATCTTGTACAAAGCATTCTACCAATCTTAGAAAACGTTGCACGGTCTGGAAGACCATTGCTCATCATAGCTGAGGACGTTGAAGGTGAAGCTCTGAGCACGCTTGTACTAAATAAGCTCCGTGGTGGCCTTCAAGTTGCTGCTGTAAAGGCGCCTGGTTTCGGTGACAGAAGAAAGGACATGCTTGGAGATATTGCTGTAATAGTAGGCGCTAAGTATGTAGTAAATGACGAGCTTGCTGTTAAGATGGAAGATATCGCTCTAAGCGATTTGGGTACTGCTAAGAGCGTTCGCATCACAAAAGACGCAACTACTATCATAGGTAGTGTTGATAGCAGTTCT
ReljaMUF53	Ovis musimon	Croatia	1	ATATTCCTTACTGAAAAGAAGATTAATCTTGTACAAAGCATTCTACCAATCTTAGAAAACGTTGCACGGTCTGGAAGGCCATTGCTCATCATAGCTGAAGACGTTGAAGGTGAAGCTCTTAGCACGCTTGTACTCAATAAGCTCCGTGGTGGCCTTCAAGTTGCTGCTGTAAAGGCGCCTGGTTTTGGTGACAGGAGAAAAGACATGCTTGGCGATATTGCTGTAATAGTAGGCGCTAAGTATGTAGTAAATGACGAGCTTGCTGTTAAGATGGAAGACATCGCTCTAAGCGATCTTGGTACTGCTAAGAGCGTACGCATCACAAAAGACGCAACTACTATCATAGGCAGTGTTGATAGCAGTTCT
ReljaMUF57	Ovis musimon	Croatia	1	ATATTCCTTACTGAAAAGAAGATTAATCTTGTACAAAGCATTCTACCAATCTTAGAAAACGTTGCACGGTCTGGAAGACCATTGCTCATCATAGCTGAAGACGTTGAAGGTGAAGCTCTTAGCACGCTTGTACTCAATAAGCTCCGTGGTGGCCTTCAAGTTGCTGCTGTAAAGGCGCCTGGTTTTGGTGACAGGAGAAAAGACATGCTTGGCGATATTGCTGTAATAGTAGGCGCTAAGTATGTAGTAAATGACGAGCTTGCTGTTAAGATGGAAGATATCGCTCTAAGCGATCTTGGTACTGCTAAGAGCGTACGCATCACAAAAGACGCAACTACTATCATAGGTAGTGTTGATAGCAGTTCT
ReljaMUF59	Ovis musimon	Croatia	1	ATATTCCTTACTGAAAAGAAGATTAATCTTGTACAAAGCATTCTACCAATCTTAGAAAACGTTGCACGGTCTGGAAGACCATTGCTCATCATAGCTGAAGACGTTGAAGGTGAAGCTCTTAGCACGCTTGTACTCAATAAGCTCCGTGGTGGCCTTCAAGTTGCTGCTGTAAAGGCGCCTGGTTTTGGTGACAGGAGAAAAGACATGCTTGGCGATATTGCTGTAATAGTAGGCGCTAAGTATGTAGTAAATGACGAGCTTGCTGTTAAGATGGAAGACATCGCTCTAAGCGATCTTGGTACTGCTAAGAGCGTACGCATCACAAAAGACGCAACTACTATCATAGGTAGTGTTGATAGCAGTTCT
ReljaRfoxL 205Sx22	Vulpes vulpes	Croatia	1	ATATTTCTTACTGAAAAGAAGATTAATCTTGTACAAAGCATTCTACCAATCTTAGAAAACGTTGCACGGTCTGGAAGACCATTGCTCATCATAGCTGAAGACGTTGAAGGTGAAGCTCTGAGCACGCTTGTACTCAATAAGCTCCGTGGTGGCCTTCAAGTTGCTGCTGTAAAGGCGCCTGGTTTCGGTGACAGGAGAAAAGACATGCTTGGCGATATTGCTGTAATAGTAGGCGCTAAGTATGTAGTAAATGACGAGCTTGCTGTTAAGATGGAAGACATCGCTCTAAGCGATCTTGGTACTGCTAAGAGCGTACGCATCACAAAAGACGCAACTACTATCATAGGTAGTGTTGATAGCAGTTCT
ReljaRfoxL51S	Vulpes vulpes	Croatia	1	ATATTTCTTACTGAAAAGAAGATTAATCTTGTACAAAGCATTCTACCAATCTTAGAAAACGTTGCACGGTCTGGAAGACCATTGCTCATCATAGCTGAAGACGTTGAAGGTGAAGCTCTGAGCACGCTTGTACTCAATAAGCTCCGTGGTGGCCTTCAAGTTGCTGCTGTAAAGGCGCCTGGTTTCGGTGACAGGAGAAAAGACATGCTTGGCGATATTGCTGTAATAGTAGGCGCTAAGTATGTAGTAAATGACGAGCTTGCTGTTAAGATGGAAGACATCGCTCTAAGCGATCTTGGTACTGCTAAGAGCGTACGCATCACAAAAGACGTAACTACTATCATAGGTAGTGTTGATAGCAGTTCT
ReljaSheep12S	Ovis aries	Croatia	1	ATATTCCTCACTGAAAAGAAGATTAATCTTGTACAAAGCATTCTACCAATCTTAGAAAACGTTGCACGGTCTGGAAGACCATTGCTCATCATAGCTGAGGACGTTGAAGGTGAAGCTCTGAGCACGCTTGTACTCAATAAGCTCCGTGGTGGCCTTCAAGTTGCTGCTGTAAAGGCGCCTGGTTTCGGTGATAGAAGAAAGGACATGCTTGGAGATATTGCTGTAATAGTAGGCGCTAAGTATGTAGTAAATGACGAGCTTGCTGTTAAGATGGAAGATATCGCTCTAAGCGATTTGGGTACTGCTAAGAGCGTTCGCATCACAAAAGACGCAACTACTATCATAGGTAGTGTTGATAGCAGTTCT
ReljaSheep14S	Ovis aries	Croatia	1	ATATTCCTCACTGAAAAGAAGATTAATCTTGTACAAAGCATTCTACCAATCTTAGAAAACGTTGCACGGTCTGGAAGACCATTGCTCATCATAGCTGAAGACGTTGAAGGTGAAGCTCTGAGCACGCTTGTGCTCAATAAGCTCCGTGGTGGCCTTCAAGTTGCTGCTGTAAAGGCACCTGGTTTCGGTGACAGAAGAAAAGACATGCTTGGAGATATTGCTGTAATAGTAGGCGCTAAGTATGTAGTAAATGACGAGCTTGCTGTTAAGATGGAAGATATCGCTCTAAGCGATTTGGGTACTGCTAAGAGCGTTCGCATCACAAAAGACGCAACTACTATCATAGGTAGTGTTGATAGCAGTTCT
ReljaSheep15S	Ovis aries	Croatia	2	ATATTCCTAACAGAGAAAAAAATTAATCTGGTACAAAACATCCTACCGGTTCTTGAAAATGTTGCTCGGTCAGGTAGGCCTCTATTGATAATCGCTGAAGATGTTGAAGGTGAAGCTTTAAGCACATTGGTACTCAATAAACTGCGTGGTGGCCTACAAGTTGCTGCGGTAAAAGCGCCTGGATTTGGGGATAGAAGAAAAGACATGCTGGGTGATATAGCTGTCATCGCCGGAGCGAAATACGTAGTCAACGACGAGCTAGCTGTAAAGATGGAAGATATTGCTCTTAGTGACTTGGGAACTGCTAAGCATGTGCGCATAACTAAGGACACTACAACAATCATTGGCAGTGTTGACAGTAGCTCT
ReljaSheep18S	Ovis aries	Croatia	1	ATATTCCTCACTGAAAAGAAGATTAATCTTGTACAAAGCATTCTACCAATCTTAGAAAACGTTGCACGGTCTGGAAGACCATTGCTCATCATAGCTGAAGACGTTGAAGGTGAAGCTCTGAGCACGCTTGTACTCAATAAGCTCCGTGGTGGCCTTCAAGTTGCTGCTGTAAAGGCGCCTGGTTTCGGTGACAGAAGAAAGGACATGCTAGGCGATATTGCTGTAATAGTAGGCGCTAAGTATGTGGTAAATGACGAGCTTGCTGTTAAGATGGAAGATATCGCTCTAAGCGATTTGGGTACTGCTAAGAGCGTTCGCATCACAAAAGACGCTACTACTATCATAGGTAGTGTTGATAGCAGTTCT
ReljaSheep22S	Ovis aries	Croatia	1	ATATTCCTCACTGAAAAGAAGATTAATCTTGTACAAAGCATTCTACCAATCTTAGAAAACGTTGCACGGTCTGGAAGACCATTGCTCATCATAGCTGAAGACGTTGAAGGTGAAGCTCTGAGCACGCTTGTACTCAATAAGCTCCGTGGTGGCCTTCAAGTTGCTGCTGTAAAGGCACCTGGTTTCGGTGACAGAAGAAAGGACATGCTAGGCGATATTGCTGTAATAGTAGGCGCTAAGTATGTGGTAAATGACGAGCTTGCTGTTAAGATGGAAGATATCGCTCTAAGCGATTTGGGTACTGCTAAGAGCGTTCGCATCACAAAAGACGCAACTACTATCATAGGTAGTGTTGATAGCAGTTCT
ReljaSheep29S	Ovis aries	Croatia	1	ATATTCCTTACTGAAAAGAAGATTAATCTTGTACAAAGCATTCTACCAATCTTAGAAAACGTTGCACGGTCTGGAAGACCATTGCTCATCATAGCTGAAGACGTTGAAGGTGAAGCTCTGAGCACGCTTGTACTCAATAAGCTCCGTGGTGGCCTTCAAGTTGCTGCTGTAAAGGCGCCTGGTTTTGGTGACAGGAGAAGAGACATGCTTGGCGATATTGCTGTAATAGTAGGCGCTAAGTATGTAGTAAATGACGAGCTTGCTGTTAAGATGGAAGATATCGCTCTAAGCGATCTTGGTACTGCTAAGAGCGTACGCATCACAAAAGACGCAACTACTATCATAGGTAGTGTTGATAGCAGTTCT
ReljaSheep2S	Ovis aries	Croatia	1	ATATTCCTCACTGAAAAGAAGATTAATCTTGTACAAAGCATTCTACCAATCTTAGAAAACGTTGCACGGTCTGGAAGACCATTGCTCATCATAGCTGAAGACGTTGAAGGTGAAGCTCTGAGCACGCTTGTACTCAATAAGCTCCGTGGTGGCCTTCAAGTTGCTGCTGTAAAGGCGCCTGGTTTCGGTGACAGAAGAAAGGACATGCTAGGCGATATCGCTGTAATAGTAGGTGCGAAGTATGTAGTAAATGACGAGCTTGCTGTTAAGATGGAAGATATCGCTCTAAGCGATTTGGGTACTGCTAAGAGCGTTCGCATCACAAAAGACGCAACTACTATCATAGGTAGTGTTGATAGCAGCTCT
ReljaSheep30S	Ovis aries	Croatia	1	ATATTCCTCACTGAAAAGAAGATTAATCTTGTACAAAGCATTCTACCAATCTTAGAAAACGTTGCACGGTCTGGAAGACCATTGCTCATCATAGCTGAGGACGTTGAAGGTGAAGCTCTGAGCACGCTTGTACTCAATAAGCTCCGTGGTGGCCTTCAAGTTGCTGCTGTAAAGGCACCTGGTTTCGGTGACAGAAGAAAAGACATGCTTGGCGATATTGCTGTAATAGTAGGTGCTAAGTATGTAGTAAATGACGAGCTTGCTGTTAAGATGGAAGATATCGCTCTAAGCGATTTGGGTACTGCTAAGAGCGTTCGCATCACAAAAGACGCAACTACTATCATAGGTAGTGTTGATAGCAGTTCT
ReljaSheep46S	Ovis aries	Croatia	2	CATTCTTCCGGTATTGGAAAATGTTGCRAGGKCTGGCAGACCGTTGCTGATAATAGCTGAAGACGTGGAAGGTGAAGCTTTAAGCACTTTGGTGCTGAACAAGCTGCGTGGTGGCCTCCAAGTTGCCGCTGTAAAAGCTCCTGGTTTCGGTGACAGACGGAAAGACATGCTGGGTGATATTGCGGTCATTGCTGGCGCTAAATACGTAGTGAACGACGAGCTTGCTATGAAGGTAGAAGACATAGCTCTCAGTGATCTTGGTACTGCTAAGCATGTTCGCATAACGAAGGATACTACTACGATTATTGGCAGTGTCGATAGCAGCTCGGAAAGCATAGCTAGCAG
ReljaSheep49S	Ovis aries	Croatia	1	ATATTCCTCACTGAAAAGAAGATTAATCTTGTACAAAGCATTCTACCAATCTTAGAAAACGTTGCACGGTCCGGAAGACCATTGCTCATCATAGCTGAAGACGTTGAAGGTGAAGCTCTGAGCACGCTTGTACTCAATAAGCTCCGTGGTGGCCTTCAAGTTGCTGCTGTAAAGGCACCTGGTTTCGGTGACAGAAGAAAGGACATGCTAGGCGATATTGCTGTAATAGTAGGCGCTAAGTATGTGGTAAATGACGAGCTTGCTGTTAAGATGGAAGATATCGCTCTAAGCGATTTGGGTACTGCTAAGAGCGTTCGCATCACAAAAGACGCAACTACTATCATAGGTAGTGTTGATAGCAGTTCT
ReljaSheep51S	Ovis aries	Croatia	1	ATATTCCTCACTGAAAAGAAGATTAATCTTGTACAAAGCATTCTACCAATCTTAGAAAACGTTGCACGGTCTGGAAGACCATTGCTCATCATAGCTGAAGACGTTGAAGGTGAAGCTCTGAGCACGCTTGTACTCAATAAGCTCCGTGGTGGCCTTCAAGTTGCTGCTGTAAAGGCGCCTGGTTTCGGTGACAGAAGAAAGGACATGCTAGGCGATATCGCTGTAATAGTAGGCGCTAAGTATGTAGTAAATGACGAGCTTGCTGTTAAGATGGAAGATATAGCTCTAAGCGATTTGGGTACTGCTAAGAGCGTTCGCATCACAAAAGACGCAACTACTATCATAGGTAGTGTTGATAGCAGTTCT
ReljaSheep61S	Ovis aries	Croatia	1	ATATTCCTCACTGAAAAGAAGATTAATCTTGTACAAAGCATTCTACCAATCTTAGAAAACGTTGCACGGTCTGGAAGACCATTGCTCATCATAGCTGAAGACGTTGAAGGTGAAGCTCTGAGCACTCTTGTGCTCAATAAGCTCCGTGGTGGCCTTCAAGTTGCTGCTGTAAAGGCACCTGGTTTCGGTGACAGAAGAAAAGACATGCTAGGAGATATTGCTGTAATAGTAGGCGCTAAGTATGTAGTAAATGACGAGCTTGCTGTTAAGATGGAAGATATCGCTCTAAGCGATTTGGGTACTGCTAAGAGCGTTCGCATCACAAAAGACGCAACTACTATCATAGGTAGTGTTGATAGCAGCTCT
ReljaSheep7S	Ovis aries	Croatia	1	ATATTCCTCACTGAAAAGAAGATTAATCTTGTACAAAGCATTCTACCAATCTTAGAAAACGTTGCACGGTCTGGAAGACCATTGCTCATCATAGCTGAAGACGTTGAAGGTGAAGCTCTGAGCACGCTTGTGCTCAATAAGCTCCGTGGTGGCCTTCAAGTTGCTGCTGTAAAGGCACCTGGTTTCGGTGACAGAAGAAAAGACATGCTAGGAGATATTGCTGTAATAGTAGGCGCTAAGTATGTAGTAAATGACGAGCTTGCTGTTAAGATGGAAGATATCGCTCTAAGCGATTTGGGTACTGCTAAGAGCGTTCGCATCACAAAAGACGCAACTACTATCATAGGTAGTGTTGATAGCAGTTCT
RJSheep15744	Ovis aries	Netherlands	1	ATATTCCTTACTGAAAAGAAGATTAATCTTGTACAAAGCATTCTACCAATCTTAGAAAACGTTGCACGGTCTGGAAGGCCATTGCTCATCATAGCTGAAGACGTTGAAGGTGAAGCTCTGAGCACGCTTGTACTCAATAAGCTCCGTGGTGGCCTTCAAGTTGCTGCTGTAAAGGCGCCTGGTTTCGGTGACAGGAGAAAAGACATGCTTGGCGATATTGCTGTAATAGTAGGCGCTAAGTATGTAGTAAATGACGAGCTTGCTGTTAAGATGGAAGATATCGCTCTAAGCGATCTTGGTACTGCTAAGAGCGTACGCATCACAAAAGACGCAACTACTATCATAGGCAGTGTTGATAGCAGTTCT
RJSheep27486	Ovis aries	Netherlands	1	GGATATCTTTCGCCTTACTTTGTTACAAATGCTGAAAAAATGCTGGTGGAATTTGAAAATCCATACATATTCCTTACTGAAAAGAAGATTAATCTTGTACAAAGCATTCTACCAATCTTAGAAAACGTTGCACGGTCTGGAAGACCATTGCTCATCATAGCTGAAGACGTTGAAGGTGAAGCTCTGAGCACGCTTGTACTCAATAAGCTCCGTGGTGGCCTTCAAGTTGCTGCTGTAAAGGCGCCTGGTTTCGGTGACAGGAGAAAAGACATGCTTGGCGATATTGCTGTAATAGTAGGCGCTAAGTATGTAGTAAATGACGAGCTTGCTGTTAAGATGGAAGATATCGCTCTAAGCGATCTTGGTACTGCTAAGAGCGTACGCATCACAAAAGACGCA…
RJSheep27521	Ovis aries	Netherlands	1	ATATTCCTTACTGAAAAGAAGATTAATCTTGTACAAAGCATTCTACCAATCTTAGAAAACGTTGCACGGTCTGGAAGACCATTGCTCATCATAGCTGAAGACGTTGAAGGTGAAGCTCTGAGCACGCTTGTACTCAATAAGCTCCGTGGTGGCCTTCAAGTTGCTGCTGTAAAGGCGCCTGGTTTCGGTGACAGGAGAAAAGACATGCTTGGCGATATTGCTGTAATAGTAGGCGCTAAGTATGTAGTAAATGACGAGCTTGCTGTTAAGATGGAAGATATCGCTCTAAGCGATCTTGGTACTGCTAAGAGCGTACGCATCACAAAAGACGCAACTACTATCATAGGCAGTGTTGATAGCAGTTCT
RJSheep44980	Ovis aries	Netherlands	1	ATATTCCTTACTGAAAAGAAGATTAATCTTGTACAAAGCATTCTACCAATCTTAGAAAACGTTGCACGGTCTGGAAGGCCATTGCTCATCATAGCTGAAGACGTTGAAGGTGAAGCTCTGAGCACGCTTGTACTCAATAAGCTCCGTGGTGGCCTTCAAGTTGCTGCTGTAAAGGCGCCTGGTTTTGGTGACAGGAGAAAAGACATGCTTGGCGATATTGCTGTAATAGTAGGCGCTAAGTATGTAGTAAATGACGAGCTTGCTGTTAAGATGGAAGATATCGCTCTAAGCGATCTTGGTACTGCTAAGAGCGTACGCATCACAAAAGACGCAACTACTATCATAGGTAGTGTTGATAGCAGTTCT
RJSheep63756	Ovis aries	Netherlands	2	ATATTCCTTACTGAAAAGAAGATTAATCTTGTACAAAGCATTTTACCAATATTAGAAAACGTTGCGAGAGCTGGCAGACCATTGCTCATCATAGCTGAAGATGTTGAAGGTGAAGCTCTGAGCACGCTTGTACTCAATAAGCTCCGTGGTGGGCTTCAAGTTGCTGCTGTAAAGGCGCCTGGTTTCGGTGACAGAAGAAAAGACATGCTAGGCGATATTGCCGTAATAGTAGGCGCTAAGTATGTAGTAAATGACGAGCTTGCTGTTAAGATGGAAGATATCGCTCTAAGCGATCTTGGTACTGCTAAGAGCGTGCGCATCACAAAAGACGCAACTACTATCATAGGTAGTGTTGATAGCAGTTCT
RJSheep66200	Ovis aries	Netherlands	1	GGATATCTTTCGCCTTACTTTGTTACAAATGCTGAAAAAATGCTGGTGGAATTTGAAAATCCATACATATTCCTTACTGAAAAGAAGATTAATCTTGTACAAAGCATTCTACCAATCTTAGAAAACGTTGCACGGTCTGGAAGACCATTGCTCATCATAGCTGAAGACGTTGAAGGTGAAGCTCTGAGCACACTTGTACTCAATAAGCTCCGTGGTGGCCTTCAAGTTGCTGCTGTAAAGGCGCCTGGTTTTGGTGACAGGAGAAAAGACATGCTTGGCGATATTGCTGTAATAGTAGGCGCTAAGTATGTAGTAAATGACGAGCTTGCTGTTAAGATGGAAGATATCGCTCTAAGCGATCTTGGTACTGCTAAGAGCGTACGCATCACAAAAGACGCA…
RJSheep66572	Ovis aries	Netherlands	1	ATATTCCTTACTGAAAAGAAGATTAATCTTGTACAAAGCATTCTACCAATCTTAGAAAACGTTGCACGGTCTGGAAGACCATTGCTCATCATAGCTGAAGACGTTGAAGGTGAAGCTCTGAGCACACTTGTACTCAATAAGCTCCGTGGTGGCCTTCAAGTTGCTGCTGTAAAGGCGCCTGGTTTTGGTGACAGGAGAAAAGACATGCTTGGCGATATTGCTGTAATAGTAGGCGCTAAGTATGTAGTAAATGACGAGCTTGCTGTTAAGATGGAAGATATCGCTCTAAGCGATCTTGGTACTGCTAAGAGCGTACGCATCACAAAAGACGCAACTACTATCATAGGTAGTGTTGATAGCAGTTCT
RJSheep83810	Ovis aries	Netherlands	1	ATATTCCTTACTGAAAAGAAGATTAATCTTGTACAAAGCATTCTACCAATCTTAGAAAACGTTGCACGGTCTGGAAGACCATTGCTCATCATAGCTGAAGACGTTGAAGGTGAAGCTCTGAGCACGCTTGTACTCAATAAGCTCCGTGGTGGCCTTCAAGTTGCTGCTGTAAAGGCGCCTGGTTTCGGTGACAGGAGAAAAGACATGCTTGGCGATATTGCTGTAATAGTAGGCGCTAAGTATGTAGTAAATGACGAGCTTGCTGTTAAGATGGAAGACATCGCTCTAAGCGATCTTGGTACTGCTAAGAGCGTACGCATCACAAAAGACGCAACTACTATCATAGGCAGTGTTGATAGCAGTTCT
RJSheep97436	Ovis aries	Netherlands	1	ATATTCCTTACTGAAAAGAAGATTAATCTTGTACAAAGCATTCTACCAATCTTAGAAAACGTTGCACGGTCTGGAAGACCATTGCTCATCATAGCTGAAGACGTTGAAGGTGAAGCTCTGAGCACGCTTGTACTCAATAAGCTCCGTGGTGGCCTTCAAGTTGCTGCTGTAAAGGCGCCTGGTTTTGGTGACAGGAGAAAAGACATGCTTGGCGATATTGCTGTAATAGTAGGCGCTAAGTATGTAGTAAATGACGAGCTTGCTGTTAAGATGGAAGATATCGCTCTAAGCGATCTTGGTACTGCTAAGAGCGTACGCATCACAAAAGACGCAACTACTATCATAGGTAGTGTTGATAGCAGTTCT
RJSheepB41	Ovis aries	Netherlands	2	ATATTCCTTACTGAAAAGAAGATTAATCTTGTACAAAGCATTTTACCAATATTAGAAAACGTTGCGAGAGCTGGTAGACCATTGCTTATCATAGCTGAAGATGTTGAAGGTGAAGCTCTGAGCACGCTTGTACTCAATAAGCTCCGTGGTGGGCTTCAAGTTGCTGCTGTAAAGGCGCCTGGTTTCGGTGACAGAAGAAAAGACATGCTAGGCGATATTGCCGTAATAGTAGGCGCTAAGTATGTAGTAAATGACGAGCTTGCTGTTAAGATGGAAGATATCGCTCTAAGCGATCTTGGTACTGCTAAGAGCGTGCGCATCACAAAAGACGCAACTACTATCATAGGTAGTGTTGATAGCAGTTCT
roedeer42	Capreolus capreolus	Netherlands	2	GCAGTTTGATCGCGGATATCTTTCGCCTTACTTTGTTACAAATGCTGAAAAAATGCTGGTGGAATTTGAAAATCCATACATATTCCTCACTGAAAAGAAGATTAATCTTGTACAAAGCATTCTACCAATATTAGAAAACGTTGCGAGAGCTGGGAGACCATTGCTCATCATAGCTGAAGACGTTGAAGGTGAAGCTCTGAGCACGCTTGTACTCAATAAGCTCCGTGGTGGGCTTCAAGTTGCTGCTGTAAAGGCGCCTGGTTTCGGTGACAGAAGAAAAGACATGCTAGGCGATATTGCCGTAATAGTAGGCGCTAAGTATGTAGTAAATGACGAGCTTGCTGTTAAGATGGAAGATATCGCTCTAAGCGATCTTGGTACTGCTAAGAGCGTGCGCAT…
roedeer44	Capreolus capreolus	Netherlands	2	TGATCGCGGATATCTTTCGCCTTACTTTGTTACAAATGCTGAAAAAATGCTGGTGGAATTTGAAAATCCATACATATTCCTTACTGAAAAGAAGATTAATCTTGTACAAAGCATTCTACCAATATTAGAAAACGTTGCGAGAGCTGGTAGACCATTGCTTATCATAGCTGAAGATGTTGAAGGTGAAGCTCTGAGCACGCTTGTACTCAATAAGCTCCGTGGTGGGCTTCAAGTTGCTGCTGTAAAGGCGCCTGGTTTCGGTGACAGAAGAAAAGACATGCTAGGCGATATTGCCGTAATAGTAGGCGCTAAGTATGTAGTAAATGACGAGCTTGCTGTTAAGATGGAAGATATCGCTCTAAGCGATCTTGGTACTGCTAAGAGCGTGCGCATCACAAA…
RoedeerTick45	Capreolus capreolus	Netherlands	2	TGATCGCGGATATCTTTCGCCTTACTTTGTTACAAATGCTGAAAAAATGCTGGTGGAATTTGAAAATCCATACATATTCCTTACTGAAAAGAAGATTAATCTTGTACAAAGCATTCTACCAATATTAGAAAACGTTGCGAGAGCTGGTAGACCATTGCTTATCATAGCTGAAGATGTTGAAGGTGAAGCTCTGAGCACGCTTGTACTCAATAAGCTCCGTGGTGGGCTTCAAGTTGCTGCTGTAAAGGCGCCTGGTTTCGGTGACAGAAGAAAAGACATGCTAGGCGATATTGCCGTAATAGTAGGCGCTAAGTATGTAGTAAATGACGAGCTTGCTGTTAAGATGGAAGATATCGCTCTAAGCGATCTTGGTACTGCTAAGAGCGTGCGCATCACAAA…
Sandor_Roadkill_E33	Erinaceus roumanicus	Hungary	1	GGATATCTTTCGCCTTACTTTGTTACAAATGCTGAAAAAATGCTGGTGGAATTTGAAAATCCATACATATTCCTTACTGAAAAGAAGATTAATCTTGTACAAAGCATTCTACCAATCTTAGAAAACGTTGCACGGTCTGGAAGACCATTGCTCATCATAGCTGAAGACGTTGAAGGTGAAGCTCTGAGCACGCTTGTACTCAATAAGCTCCGTGGTGGCCTTCAAGTTGCTGCTGTAAAGGCGCCTGGTTTCGGTGACAGGAGAAAAGACATGCTTGGCGATATTGCTGTAATAGTAGGCGCTAAGTATGTAGTAAATGACGAGCTTGCTGTTAAGATGGAAGACATCGCTCTAAGCGATCTTGGTACTGCTAAGAGCGTACGCATCACAAAAGACGCA…
sheepVp194	Ovis aries	Netherlands	1	TGATCGCGGATATCTTTCGCCTTACTTTGTTACAAATGCTGAAAAAATGCTGGTGGAATTTGAAAATCCATACATATTCCTTACTGAAAAGAAGATTAATCTTGTACAAAGCATTCTACCAATCTTAGAAAACGTTGCACGGTCTGGAAGACCATTGCTCATCATAGCTGAAGACGTTGAAGGTGAAGCTCTGAGCACGCTTGTACTCAATAAGCTCCGTGGTGGCCTTCAAGTTGCTGCTGTAAAGGCGCCTGGTTTCGGTGACAGGAGAAAAGACATGCTTGGCGATATTGCTGTAATAGTAGGCGCTAAGTATGTAGTAAATGACGAGCTTGCTGTTAAGATGGAAGACATCGCTCTAAGCGATCTTGGTACTGCTAAGAGCGTACGCATCACAAA…
sheepVp254	Ovis aries	Netherlands	1	TGATCGCGGATATCTTTCGCCTTACTTTGTTACAAATGCTGAAAAAATGCTGGTGGAATTTGAAAATCCATACATATTCCTTACTGAAAAGAAGATTAATCTTGTACAAAGCATTCTACCAATCTTAGAAAACGTTGCACGGTCTGGAAGACCATTGCTCATCATAGCTGAAGACGTTGAAGGTGAAGCTCTGAGCACGCTTGTACTCAATAAGCTCCGTGGTGGCCTTCAAGTTGCTGCTGTAAAGGCGCCTGGTTTTGGTGACAGGAGAAAAGACATGCTTGGCGATATTGCTGTAATAGTAGGCGCTAAGTATGTAGTAAATGACGAGCTTGCTGTTAAGATGGAAGACATCGCTCTAAGCGATCTTGGTACTGCTAAGAGCGTACGCATCACAAA…
sheepVp37	goat/sheep	Netherlands	1	TGATGGTATGCAGTTTGATCGCGGATATCTTTCGCCTTACTTTGTTACAAATGCTGAAAAAATGCTGGTGGAATTTGAAAATCCATACATATTCCTTACTGAAAAGAAGATTAATCTTGTACAAAGCATTCTACCAATCTTAGAAAACGTTGCACGGTCTGGAAGACCATTGCTCATCATAGCTGAAGACGTTGAAGGTGAAGCTCTTAGCACGCTTGTACTCAATAAGCTCCGTGGTGGCCTTCAAGTTGCTGCTGTAAAGGCGCCTGGTTTTGGTGACAGGAGAAAAGACATGCTTGGCGATATTGCTGTAATAGTAGGCGCTAAGTATGTAGTAAATGACGAGCTTGCTGTTAAGATGGAAGATATCGCTCTAAGCGATCTTGGTACTGCTAAGAG…
sheepVp40	Ovis aries	Netherlands	1	AGTTTGATCGCGGATATCTTTCGCCTTACTTTGTTACAAATGCTGAAAAAATGCTGGTGGAATTTGAAAATCCATACATATTCCTTACTGAAAAGAAGATTAATCTTGTACAAAGCATTCTACCAATCTTAGAAAACGTTGCACGGTCTGGAAGACCATTGCTCATCATAGCTGAAGACGTTGAAGGTGAAGCTCTTAGCACGCTTGTACTCAATAAGCTCCGTGGTGGCCTTCAAGTTGCTGCTGTAAAGGCGCCTGGTTTTGGTGACAGGAGAAAAGACATGCTTGGCGATATTGCTGTAATAGTAGGCGCTAAGTATGTAGTAAATGACGAGCTTGCTGTTAAGATGGAAGATATCGCTCTAAGCGATCTTGGTACTGCTAAGAGCGTACGCATCA…
sheepVp51	Ovis aries	Netherlands	1	GGTATGCAGTTTGATCGCGGATATCTTTCGCCTTACTTTGTTACAAATGCTGAAAAAATGCTGGTGGAATTTGAAAATCCATACATATTCCTTACTGAAAAGAAGATTAATCTTGTACAAAGCATTCTACCAATCTTAGAAAACGTTGCACGGTCTGGAAGACCATTGCTCATCATAGCTGAAGACGTTGAAGGTGAAGCTCTTAGCACGCTTGTACTCAATAAGCTCCGTGGTGGCCTTCAAGTTGCTGCTGTAAAGGCGCCTGGTTTTGGTGACAGGAGAAAAGACATGCTTGGCGATATTGCTGTAATAGTAGGCGCTAAGTATGTAGTAAATGACGAGCTTGCTGTTAAGATGGAAGATATCGCTCTAAGCGATCTTGGTACTGCTAAGAGCGTA…
sheepVp64	Ovis aries	Netherlands	1	GTTTGATCGCGGATATCTTTCGCCTTACTTTGTTACAAATGCTGAAAAAATGCTGGTGGAATTTGAAAATCCATACATATTCCTTACTGAAAAGAAGATTAATCTTGTACAAAGCATTCTACCAATCTTAGAAAACGTTGCACGGTCTGGAAGACCATTGCTCATCATAGCTGAAGACGTTGAAGGTGAAGCTCTGAGCACGCTTGTACTCAATAAGCTCCGTGGTGGCCTTCAAGTTGCTGCTGTAAAGGCGCCTGGTTTCGGTGACAGGAGAAAAGACATGCTTGGCGATATTGCTGTAATAGTAGGCGCTAAGTATGTAGTAAATGACGAGCTTGCTGTTAAGATGGAAGATATCGCTCTAAGCGATCTTGGTACTGCTAAGAGCGTACGCATCAC…
sheepVp68	Ovis aries	Netherlands	1	TGATCGCGGATATCTTTCGCCTTACTTTGTTACAAATGCTGAAAAAATGCTGGTGGAATTTGAAAATCCATACATATTCCTTACTGAAAAGAAGATTAATCTTGTACAAAGCATTCTACCAATCTTAGAAAACGTTGCACGGTCTGGAAGACCATTGCTCATCATAGCTGAAGACGTTGAAGGTGAAGCTCTGAGCACGCTTGTACTCAATAAGCTCCGTGGTGGCCTTCAAGTTGCTGCTGTAAAGGCGCCTGGTTTCGGTGACAGGAGAAAAGACATGCTTGGCGATATTGCTGTAATAGTAGGCGCTAAGTATGTAGTAAATGACGAGCTTGCTGTTAAGATGGAAGATATCGCTCTAAGCGATCTTGGTACTGCTAAGAGCGTACGCATCACAAA…
sheepVp71	Ovis aries	Netherlands	1	AGTTTGATCGCGGATATCTTTCGCCTTACTTTGTTACAAATGCTGAAAAAATGCTGGTGGAATTTGAAAATCCATACATATTCCTTACTGAAAAGAAGATTAATCTTGTACAAAGCATTCTACCAATCTTAGAAAACGTTGCACGGTCTGGAAGACCATTGCTCATCATAGCTGAAGACGTTGAAGGTGAAGCTCTGAGCACGCTTGTACTCAATAAGCTCCGTGGTGGCCTTCAAGTTGCTGCTGTAAAGGCGCCTGGTTTCGGTGACAGAAGAAAAGACATGCTTGGCGATATTGCTGTAATAGTAGGTGCTAAGTATGTAGTAAATGACGAGCTTGCTGTTAAGATGGAAGATATCGCTCTAAGCGATTTGGGTACTGCTAAGAGCGTACGCATCA…
sheepVp73	Ovis aries	Netherlands	1	GGTATGCAGTTTGATCGCGGATATCTTTCGCCTTACTTTGTTACAAATGCTGAAAAAATGCTGGTGGAATTTGAAAATCCATACATATTCCTTACTGAAAAGAAGATTAATCTTGTACAAAGCATTCTACCAATCTTAGAAAACGTTGCACGGTCTGGAAGACCATTGCTCATCATAGCTGAAGACGTTGAAGGTGAAGCTCTGAGCACGCTTGTACTCAATAAGCTCCGTGGTGGCCTTCAAGTTGCTGCTGTAAAGGCGCCTGGTTTCGGTGACAGAAGAAAAGACATGCTTGGCGATATTGCTGTAATAGTAGGTGCTAAGTATGTAGTAAATGACGAGCTTGCTGTTAAGATGGAAGATATCGCTCTAAGCGATTTGGGTACTGCTAAGAGCGTA…
sheepVp74	Ovis aries	Netherlands	1	AGTTTGATCGCGGATATCTTTCGCCTTACTTTGTTACAAATGCTGAAAAAATGCTGGTGGAATTTGAAAATCCATACATATTCCTTACTGAAAAGAAGATTAATCTTGTACAAAGCATTCTACCAATCTTAGAAAACGTTGCACGGTCTGGAAGACCATTGCTCATCATAGCTGAAGACGTTGAAGGTGAAGCTCTGAGCACGCTTGTACTCAATAAGCTCCGTGGTGGCCTTCAAGTTGCTGCTGTAAAGGCGCCTGGTTTCGGTGACAGAAGAAAAGACATGCTTGGCGATATTGCTGTAATAGTAGGTGCTAAGTATGTAGTAAATGACGAGCTTGCTGTTAAGATGGAAGATATCGCTCTAAGCGATTTGGGTACTGCTAAGAGCGTACGCATCA…
sheepVp82	Ovis aries	Netherlands	1	ATCGCGGATATCTTTCGCCTTACTTTGTTACAAATGCTGAAAAAATGCTGGTGGAATTTGAAAATCCATACATATTCCTTACTGAAAAGAAGATTAATCTTGTACAAAGCATTCTACCAATCTTAGAAAACGTTGCACGGTCTGGAAGACCATTGCTCATCATAGCTGAAGACGTTGAAGGTGAAGCTCTTAGCACGCTTGTACTCAATAAGCTCCGTGGTGGCCTTCAAGTTGCTGCTGTAAAGGCGCCTGGTTTTGGTGACAGGAGAAAAGACATGCTTGGCGATATTGCTGTAATAGTAGGCGCTAAGTATGTAGTAAATGACGAGCTTGCTGTTAAGATGGAAGATATCGCTCTAAGCGATCTTGGTACTGCTAAGAGCGTACGCATCACAAAAG…
U96727	Equus caballus	USA	1	AGAGTTCGACGGTAAGAAGTTCATAGTGATGAAGGAGAGTGACATAATAGCTAAGGAAGCATAGTCTTATGCTACGGTTGTTTGTTCTATTGGTCTAAAGTTTAGGAGGTTCAAAAATGTCAAATACGGTAGTCACGGGTGAGGTATTAGATAAGTCTATTAGGGAGGTAGTACGCATCCTAGAAGATGCAGTTGGTTGTACTGCTGGTCCTAAAGGCCTCACTGTAGCGATTAGTAAGCCTTATGGGTCGCCAGAGATCACAAAGGATGGCTACAAGGTAATGAAGAGTATAAAGCCTGAAGAACCACTGGCTGCCGCTATAGCGAGCATCATTACTCAGAGTGCTTCTCAGTGTAATGATAAGGTGGGAGATGGAACTACTACATGCTCCATACTAA…
U96728	Homo sapiens	USA	1	AGAGTTCGACGGTAAGAAGTTCATAGTGATGAAGGAGAGTGACATAATAGCTAAGGAAGCATAGTCTTATGCTACGGTTGTTTGTTCTATTGGTCTAAAGTTTAGGAGGTTCAAAAATGTCAAATACGGTAGTCACGGGTGAGGTATTAGATAAGTCTATTAGGGAGGTAGTACGCATCCTAGAAGATGCAGTTGGTTGTACTGCTGGTCCTAAAGGCCTCACTGTAGCGATTAGTAAGCCTTATGGGTCGCCAGAGATCACAAAGGATGGCTACAAGGTAATGAAGAGTATAAAGCCTGAAGAACCACTGGCTGCCGCTATAGCGAGCATCATTACTCAGAGTGCTTCTCAGTGTAATGATAAGGTGGGAGATGGAACTACTACATGCTCCATACTAA…
U96729	Capra aegagrus	Scotland	1	AGAGTTCGAGGTAAGAAGTTCATAGTGATGAAGGAGAGTGACATAATAGCTAAGGAAGCATAGTCTTATGCTACGGTTGTTTGTTCTATTGGTCTAAAGTTTAGGAGGTTCAAAAATGTCAAATACGGTAGTCACGGGTGAGGTATTAGATAAGTCTATTAGGGAGGTAGTACGCATCCTAGAAGATGCAGTTGGTTGTACTGCTGGTCCTAAAGGCCTCACTGTAGCGATTAGTAAGCCTTATGGGTCGCCAGAGATCACAAAGGATGGCTACAAGGTAATGAAGAGTATAAAGCCTGAAGAACCACTGGCTGCCGCTATAGCGAGCATCATTACTCAGAGTGCTTCTCAGTGTAATGATAAGGTGGGAGATGGAACTACTACATGCTCCATACTAAC…
U96730	Ovis aries	Scotland	1	GCTAAGGAAGCATAGTCTTATGCTACGGTTGTTTGTTCTATTGGTCTAAAGTTTAGGAGGTTCAAAAATGTCAAATACGGTAGTCACGGGTGAGGTATTAGATAAGTCTATTAGGGAGGTAGTACGCATCCTAGAAGATGCAGTTGGTTGTACTGCTGGTCCTAAAGGCCTCACTGTAGCGATTAGTAAGCCTTATGGGTCGCCAGAGATCACAAAGGATGGCTACAAGGTAATGAAGAGTATAAAGCCTGAAGAACCACTGGCTGCCGCTATAGCGAGCATCATTACTCAGAGTGCTTCTCAGTGTAATGATAAGGTGGGAGATGGAACTACTACATGCTCCATACTAACAGCAAAAGTGATTGAAGAAGTCTCAAAAGCGAAAGCTGCTGGATCTGA…
U96735	Equus caballus	Switzerland	1	AGAGTTCGACGGTAAGAAGTTCATAGTGATGAAGGAGAGTGACATAATAGCTAAGGAAGCATAGTCTTATGCTACGGTTGTTTGTTCTATTGGTCTAAAGTTTAGGAGGTTCAAAAATGTCAAATACGGTAGTCACGGGTGAGGTATTAGATAAGTCTATTAGGGAAGTAGTACGCATCCTAGAAGATGCAGTTGGTTGTACTGCTGGTCCTAAAGGCCTCACTGTAGCGATTAGTAAGCCTTATGGGTCGCCAGAGATCACAAAGGATGGCTACAAGGTAATGAAGAGTATAAAGCCTGAAGAACCACTGGCTGCCGCTATAGCGAGCATCATTACTCAGAGTGCTTCTCAGTGTAATGATAAGGTGGGAGATGGAACTACTACATGCTCCATACTAA…
wildboar505	Sus scrofa	Netherlands	1	TTGTTACAAATGCTGAAAAAATGCTGGTGGAATTTGAAAATCCATACATATTCCTTACTGAAAAGAAGATTAATCTTGTACAAAGCATTCTACCAATCTTAGAAAACGTTGCACGGTCTGGAAGACCATTGCTCATCATAGCTGAAGACGTTGAAGGTGAAGCTCTGAGCACGCTTGTACTCAATAAGCTCCGTGGTGGCCTTCAAGTTGCTGCTGTAAAGGCGCCTGGTTTTGGTGACAGGAGAAAAGACATGCTTGGCGATATTGCTGTAATAGTAGGCGCTAAGTATGTAGTAAATGACGAGCTTGCTGTTAAGATGGAAGATATCGCTCTAAGCGATCTTGGTACTGCTAAGAGCGTACGCATCACAAAAGACGCAACTACTATCATAGGTAGTG…
